# Supplementary material for: Achieving short ignition delay and high specific impulse with cyanoborohydride-based hypergolic ionic liquids
Source: Royal Society of Chemistry journal article supplement (doi:10.1039/d2nj03372k), 2022-01-01
Supplement: d2nj03372k1.pdf [file d2nj03372k1.pdf]

## Supporting Information

### Achieving short ignition delay and high specific impulse with cyanoborohydride-based hypergolic ionic liquids

Amélie Pialat,<sup>a</sup> Alexandros A. Kitos,<sup>a</sup> Tomasz G. Witkowski,<sup>a,b</sup> Cyril Cook,<sup>a</sup> Shiliang Wang,<sup>c</sup> Anguang Hu<sup>\*c</sup> and Muralee Murugesu<sup>\*a</sup>

<sup>a</sup> Department of Chemistry, University of Ottawa, 10 Marie Curie, Ottawa, Ontario, Canada, K1N 6N5

<sup>b</sup> Present affiliation: Federal Institute for Materials Research and Testing (BAM), Division 2.6 Testing and Evaluation of Explosives and Pyrotechnics, Unter den Eichen 87, D-12205 Berlin, Germany

<sup>c</sup> Defense R&D Canada-Suffield Research Centre, PO Box 4000 Station Main  
Medicine Hat, AB, Canada, T1A 8K6

### Table of Contents

|                                                                        |           |
|------------------------------------------------------------------------|-----------|
| <b>X-Ray crystallographic studies .....</b>                            | <b>2</b>  |
| <b>Characterization of the starting materials 2-9, 16 and 18.....</b>  | <b>7</b>  |
| <b>Characterization of the ionic liquids 10-15, 17, 19 and 20.....</b> | <b>17</b> |
| <b>Computational Methods .....</b>                                     | <b>40</b> |
| <b>Theoretical studies.....</b>                                        | <b>42</b> |
| <b>Differential scanning calorimetry (DSC) curves.....</b>             | <b>43</b> |
| <b><sup>23</sup>Na-NMR of 17 .....</b>                                 | <b>44</b> |
| <b>References .....</b>                                                | <b>44</b> |

## X-Ray crystallographic studies

X-ray crystallographic data for compound **20** were collected on a single crystal mounted on a loop fibre. Data were collected using a Bruker Venture diffractometer equipped with a Photon 100 CMOS Detector, a Helios MX optics (Ga  $K\alpha$  radiation,  $\lambda = 1.34139 \text{ \AA}$ ) and a Kappa goniometer. The crystal-to-detector distance was 4.0 cm, and the data collection was carried out in 1024 x 1024 pixel mode. SADABS2014/5 (Bruker, 2014/5) was used for absorption correction. H atoms were treated by a mixture of independent and constrained refinement. Crystallographic data for the structure reported in this paper have been deposited with the Cambridge Crystallographic Centre (CCDC) as supplementary publication no. 1549198.

**Table 1.** Selected crystallographic data for **20**.

| <b>20</b>                                                                |                                                         |
|--------------------------------------------------------------------------|---------------------------------------------------------|
| Empirical formula                                                        | [C <sub>28</sub> H <sub>60</sub> N][CH <sub>3</sub> BN] |
| Formula weight/ gmol <sup>-1</sup>                                       | 450.62                                                  |
| T/ K                                                                     | 105                                                     |
| Crystal system                                                           | Triclinic                                               |
| Space group                                                              | <i>P</i> -1                                             |
| <i>a</i> /Å                                                              | 9.5425 (6)                                              |
| <i>b</i> /Å                                                              | 11.4283 (7)                                             |
| <i>c</i> /Å                                                              | 14.5168 (9)                                             |
| $\alpha$ °                                                               | 89.121 (4)                                              |
| $\beta$ °                                                                | 78.840 (3)                                              |
| $\gamma$ °                                                               | 88.990 (3)                                              |
| <i>V</i> / Å <sup>3</sup>                                                | 1552.83 (17)                                            |
| <i>Z</i>                                                                 | 2                                                       |
| Radiation type                                                           | Ga $K\alpha$ , $\lambda = 1.34139 \text{ \AA}$          |
| Crystal size/ mm                                                         | 0.36 x 0.18 x 0.1                                       |
| $\mu$ / mm <sup>-1</sup>                                                 | 0.25                                                    |
| Reflections collected                                                    | 6484                                                    |
| Independent reflns [ <i>R</i> <sub>int</sub> ]                           | 6484 [0.094]                                            |
| Goodness-of-fit on <i>F</i> <sup>2</sup>                                 | 1.031                                                   |
| <i>R</i> [ <i>F</i> <sup>2</sup> > 2 <i>s</i> ( <i>F</i> <sup>2</sup> )] | 0.086                                                   |
| <i>wR</i> ( <i>F</i> <sup>2</sup> )                                      | 0.251                                                   |

**Table S2.** Selected geometric parameters (Å, °)

|        |           |          |           |
|--------|-----------|----------|-----------|
| N1—C1  | 1.522 (4) | C15—H15B | 0.9900    |
| N1—C8  | 1.519 (3) | C15—C16  | 1.506 (4) |
| N1—C15 | 1.520 (3) | C16—H16A | 0.9900    |
| N1—C22 | 1.518 (3) | C16—H16B | 0.9900    |
| C1—H1A | 0.9900    | C16—C17  | 1.527 (4) |
| C1—H1B | 0.9900    | C17—H17A | 0.9900    |
| C1—C2  | 1.515 (4) | C17—H17B | 0.9900    |
| C2—H2A | 0.9900    | C17—C18  | 1.521 (4) |
| C2—H2B | 0.9900    | C18—H18A | 0.9900    |

|          |           |          |           |
|----------|-----------|----------|-----------|
| C2—C3    | 1.520 (4) | C18—H18B | 0.9900    |
| C3—H3A   | 0.9900    | C18—C19  | 1.525 (4) |
| C3—H3B   | 0.9900    | C19—H19A | 0.9900    |
| C3—C4    | 1.514 (4) | C19—H19B | 0.9900    |
| C4—H4A   | 0.9900    | C19—C20  | 1.510 (4) |
| C4—H4B   | 0.9900    | C20—H20A | 0.9900    |
| C4—C5    | 1.519 (4) | C20—H20B | 0.9900    |
| C5—H5A   | 0.9900    | C20—C21  | 1.522 (4) |
| C5—H5B   | 0.9900    | C21—H21A | 0.9800    |
| C5—C6    | 1.510 (4) | C21—H21B | 0.9800    |
| C6—H6A   | 0.9900    | C21—H21C | 0.9800    |
| C6—H6B   | 0.9900    | C22—H22A | 0.9900    |
| C6—C7    | 1.513 (4) | C22—H22B | 0.9900    |
| C7—H7A   | 0.9800    | C22—C23  | 1.513 (4) |
| C7—H7B   | 0.9800    | C23—H23A | 0.9900    |
| C7—H7C   | 0.9800    | C23—H23B | 0.9900    |
| C8—H8A   | 0.9900    | C23—C24  | 1.525 (4) |
| C8—H8B   | 0.9900    | C24—H24A | 0.9900    |
| C8—C9    | 1.507 (4) | C24—H24B | 0.9900    |
| C9—H9A   | 0.9900    | C24—C25  | 1.510 (4) |
| C9—H9B   | 0.9900    | C25—H25A | 0.9900    |
| C9—C10   | 1.530 (4) | C25—H25B | 0.9900    |
| C10—H10A | 0.9900    | C25—C26  | 1.534 (4) |
| C10—H10B | 0.9900    | C26—H26A | 0.9900    |
| C10—C11  | 1.508 (4) | C26—H26B | 0.9900    |
| C11—H11A | 0.9900    | C26—C27  | 1.508 (4) |
| C11—H11B | 0.9900    | C27—H27A | 0.9900    |
| C11—C12  | 1.526 (4) | C27—H27B | 0.9900    |
| C12—H12A | 0.9900    | C27—C28  | 1.521 (4) |
| C12—H12B | 0.9900    | C28—H28A | 0.9800    |
| C12—C13  | 1.504 (4) | C28—H28B | 0.9800    |

|            |           |               |           |
|------------|-----------|---------------|-----------|
| C13—H13A   | 0.9900    | C28—H28C      | 0.9800    |
| C13—H13B   | 0.9900    | N2—C29        | 1.093 (5) |
| C13—C14    | 1.524 (4) | C29—B1        | 1.611 (7) |
| C14—H14A   | 0.9800    | B1—H1C        | 1.11 (4)  |
| C14—H14B   | 0.9800    | B1—H1D        | 0.97 (4)  |
| C14—H14C   | 0.9800    | B1—H1E        | 1.10 (4)  |
| C15—H15A   | 0.9900    |               |           |
|            |           |               |           |
| C8—N1—C1   | 105.8 (2) | N1—C15—H15B   | 108.2     |
| C8—N1—C15  | 110.8 (2) | H15A—C15—H15B | 107.3     |
| C15—N1—C1  | 111.6 (2) | C16—C15—N1    | 116.4 (2) |
| C22—N1—C1  | 111.0 (2) | C16—C15—H15A  | 108.2     |
| C22—N1—C8  | 111.5 (2) | C16—C15—H15B  | 108.2     |
| C22—N1—C15 | 106.3 (2) | C15—C16—H16A  | 109.6     |
| N1—C1—H1A  | 108.1     | C15—C16—H16B  | 109.6     |
| N1—C1—H1B  | 108.1     | C15—C16—C17   | 110.4 (2) |
| H1A—C1—H1B | 107.3     | H16A—C16—H16B | 108.1     |
| C2—C1—N1   | 117.0 (2) | C17—C16—H16A  | 109.6     |
| C2—C1—H1A  | 108.1     | C17—C16—H16B  | 109.6     |
| C2—C1—H1B  | 108.1     | C16—C17—H17A  | 109.2     |
| C1—C2—H2A  | 109.5     | C16—C17—H17B  | 109.2     |
| C1—C2—H2B  | 109.5     | H17A—C17—H17B | 107.9     |
| C1—C2—C3   | 110.5 (2) | C18—C17—C16   | 112.0 (2) |
| H2A—C2—H2B | 108.1     | C18—C17—H17A  | 109.2     |
| C3—C2—H2A  | 109.5     | C18—C17—H17B  | 109.2     |
| C3—C2—H2B  | 109.5     | C17—C18—H18A  | 108.7     |
| C2—C3—H3A  | 109.1     | C17—C18—H18B  | 108.7     |
| C2—C3—H3B  | 109.1     | C17—C18—C19   | 114.3 (3) |
| H3A—C3—H3B | 107.9     | H18A—C18—H18B | 107.6     |
| C4—C3—C2   | 112.4 (2) | C19—C18—H18A  | 108.7     |
| C4—C3—H3A  | 109.1     | C19—C18—H18B  | 108.7     |

|            |           |               |           |
|------------|-----------|---------------|-----------|
| C4—C3—H3B  | 109.1     | C18—C19—H19A  | 108.6     |
| C3—C4—H4A  | 108.3     | C18—C19—H19B  | 108.6     |
| C3—C4—H4B  | 108.3     | H19A—C19—H19B | 107.6     |
| C3—C4—C5   | 115.8 (2) | C20—C19—C18   | 114.6 (3) |
| H4A—C4—H4B | 107.4     | C20—C19—H19A  | 108.6     |
| C5—C4—H4A  | 108.3     | C20—C19—H19B  | 108.6     |
| C5—C4—H4B  | 108.3     | C19—C20—H20A  | 108.9     |
| C4—C5—H5A  | 109.1     | C19—C20—H20B  | 108.9     |
| C4—C5—H5B  | 109.1     | C19—C20—C21   | 113.2 (3) |
| H5A—C5—H5B | 107.8     | H20A—C20—H20B | 107.8     |
| C6—C5—C4   | 112.7 (2) | C21—C20—H20A  | 108.9     |
| C6—C5—H5A  | 109.1     | C21—C20—H20B  | 108.9     |
| C6—C5—H5B  | 109.1     | C20—C21—H21A  | 109.5     |
| C5—C6—H6A  | 108.5     | C20—C21—H21B  | 109.5     |
| C5—C6—H6B  | 108.5     | C20—C21—H21C  | 109.5     |
| C5—C6—C7   | 114.9 (2) | H21A—C21—H21B | 109.5     |
| H6A—C6—H6B | 107.5     | H21A—C21—H21C | 109.5     |
| C7—C6—H6A  | 108.5     | H21B—C21—H21C | 109.5     |
| C7—C6—H6B  | 108.5     | N1—C22—H22A   | 108.1     |
| C6—C7—H7A  | 109.5     | N1—C22—H22B   | 108.1     |
| C6—C7—H7B  | 109.5     | H22A—C22—H22B | 107.3     |
| C6—C7—H7C  | 109.5     | C23—C22—N1    | 116.7 (2) |
| H7A—C7—H7B | 109.5     | C23—C22—H22A  | 108.1     |
| H7A—C7—H7C | 109.5     | C23—C22—H22B  | 108.1     |
| H7B—C7—H7C | 109.5     | C22—C23—H23A  | 109.7     |
| N1—C8—H8A  | 108.3     | C22—C23—H23B  | 109.7     |
| N1—C8—H8B  | 108.3     | C22—C23—C24   | 109.8 (2) |
| H8A—C8—H8B | 107.4     | H23A—C23—H23B | 108.2     |
| C9—C8—N1   | 116.0 (2) | C24—C23—H23A  | 109.7     |
| C9—C8—H8A  | 108.3     | C24—C23—H23B  | 109.7     |
| C9—C8—H8B  | 108.3     | C23—C24—H24A  | 108.9     |

|               |           |               |           |
|---------------|-----------|---------------|-----------|
| C8—C9—H9A     | 109.7     | C23—C24—H24B  | 108.9     |
| C8—C9—H9B     | 109.7     | H24A—C24—H24B | 107.7     |
| C8—C9—C10     | 110.0 (2) | C25—C24—C23   | 113.3 (2) |
| H9A—C9—H9B    | 108.2     | C25—C24—H24A  | 108.9     |
| C10—C9—H9A    | 109.7     | C25—C24—H24B  | 108.9     |
| C10—C9—H9B    | 109.7     | C24—C25—H25A  | 108.8     |
| C9—C10—H10A   | 109.1     | C24—C25—H25B  | 108.8     |
| C9—C10—H10B   | 109.1     | C24—C25—C26   | 113.9 (2) |
| H10A—C10—H10B | 107.8     | H25A—C25—H25B | 107.7     |
| C11—C10—C9    | 112.7 (2) | C26—C25—H25A  | 108.8     |
| C11—C10—H10A  | 109.1     | C26—C25—H25B  | 108.8     |
| C11—C10—H10B  | 109.1     | C25—C26—H26A  | 108.3     |
| C10—C11—H11A  | 108.7     | C25—C26—H26B  | 108.3     |
| C10—C11—H11B  | 108.7     | H26A—C26—H26B | 107.4     |
| C10—C11—C12   | 114.2 (3) | C27—C26—C25   | 115.8 (3) |
| H11A—C11—H11B | 107.6     | C27—C26—H26A  | 108.3     |
| C12—C11—H11A  | 108.7     | C27—C26—H26B  | 108.3     |
| C12—C11—H11B  | 108.7     | C26—C27—H27A  | 109.2     |
| C11—C12—H12A  | 109.0     | C26—C27—H27B  | 109.2     |
| C11—C12—H12B  | 109.0     | C26—C27—C28   | 112.2 (3) |
| H12A—C12—H12B | 107.8     | H27A—C27—H27B | 107.9     |
| C13—C12—C11   | 113.1 (3) | C28—C27—H27A  | 109.2     |
| C13—C12—H12A  | 109.0     | C28—C27—H27B  | 109.2     |
| C13—C12—H12B  | 109.0     | C27—C28—H28A  | 109.5     |
| C12—C13—H13A  | 108.9     | C27—C28—H28B  | 109.5     |
| C12—C13—H13B  | 108.9     | C27—C28—H28C  | 109.5     |
| C12—C13—C14   | 113.6 (3) | H28A—C28—H28B | 109.5     |
| H13A—C13—H13B | 107.7     | H28A—C28—H28C | 109.5     |
| C14—C13—H13A  | 108.9     | H28B—C28—H28C | 109.5     |
| C14—C13—H13B  | 108.9     | N2—C29—B1     | 179.1 (5) |
| C13—C14—H14A  | 109.5     | C29—B1—H1C    | 113 (2)   |

|                |            |                 |            |
|----------------|------------|-----------------|------------|
| C13—C14—H14B   | 109.5      | C29—B1—H1D      | 113 (2)    |
| C13—C14—H14C   | 109.5      | C29—B1—H1E      | 111 (2)    |
| H14A—C14—H14B  | 109.5      | H1C—B1—H1D      | 108 (3)    |
| H14A—C14—H14C  | 109.5      | H1C—B1—H1E      | 106 (3)    |
| H14B—C14—H14C  | 109.5      | H1D—B1—H1E      | 105 (3)    |
| N1—C15—H15A    | 108.2      |                 |            |
| N1—C1—C2—C3    | -177.8 (2) | C10—C11—C12—C13 | -169.5 (3) |
| N1—C8—C9—C10   | -174.4 (2) | C11—C12—C13—C14 | -177.9 (2) |
| N1—C15—C16—C17 | -179.6 (2) | C15—N1—C1—C2    | -49.4 (3)  |
| N1—C22—C23—C24 | 176.9 (2)  | C15—N1—C8—C9    | 67.9 (3)   |
| C1—N1—C8—C9    | -171.0 (2) | C15—N1—C22—C23  | -174.6 (3) |
| C1—N1—C15—C16  | -54.9 (3)  | C15—C16—C17—C18 | -178.9 (3) |
| C1—N1—C22—C23  | 63.9 (3)   | C16—C17—C18—C19 | 178.9 (3)  |
| C1—C2—C3—C4    | -167.3 (2) | C17—C18—C19—C20 | 67.9 (4)   |
| C2—C3—C4—C5    | -173.5 (3) | C18—C19—C20—C21 | -178.6 (3) |
| C3—C4—C5—C6    | -176.9 (2) | C22—N1—C1—C2    | 69.0 (3)   |
| C4—C5—C6—C7    | -175.8 (3) | C22—N1—C8—C9    | -50.2 (3)  |
| C8—N1—C1—C2    | -169.9 (2) | C22—N1—C15—C16  | -176.1 (3) |
| C8—N1—C15—C16  | 62.7 (3)   | C22—C23—C24—C25 | 176.8 (3)  |
| C8—N1—C22—C23  | -53.9 (3)  | C23—C24—C25—C26 | -176.9 (3) |
| C8—C9—C10—C11  | -166.0 (2) | C24—C25—C26—C27 | -69.6 (4)  |
| C9—C10—C11—C12 | 178.7 (2)  | C25—C26—C27—C28 | 177.7 (2)  |

**Table S3.** Selected hydrogen-bond parameters.

| <i>D</i> —H··· <i>A</i> | <i>D</i> —H (Å) | H··· <i>A</i> (Å) | <i>D</i> ··· <i>A</i> (Å) | <i>D</i> —H··· <i>A</i> (°) |
|-------------------------|-----------------|-------------------|---------------------------|-----------------------------|
| C23—H23B···N2           | 0.99            | 2.58              | 3.380 (5)                 | 137.7                       |

## Characterization of the starting materials 2-9, 16 and 18

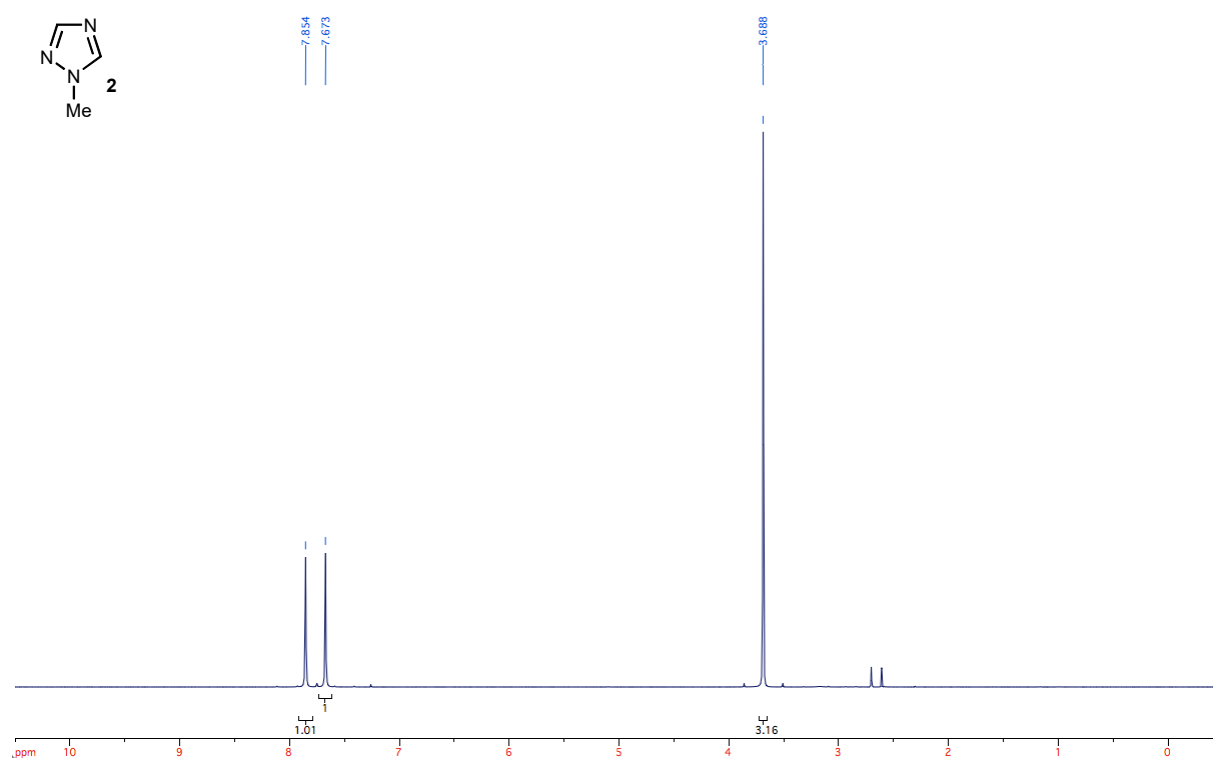

**Fig. S1.** <sup>1</sup>H NMR of 1-Methyl-1H-1,2,4-triazole (2).



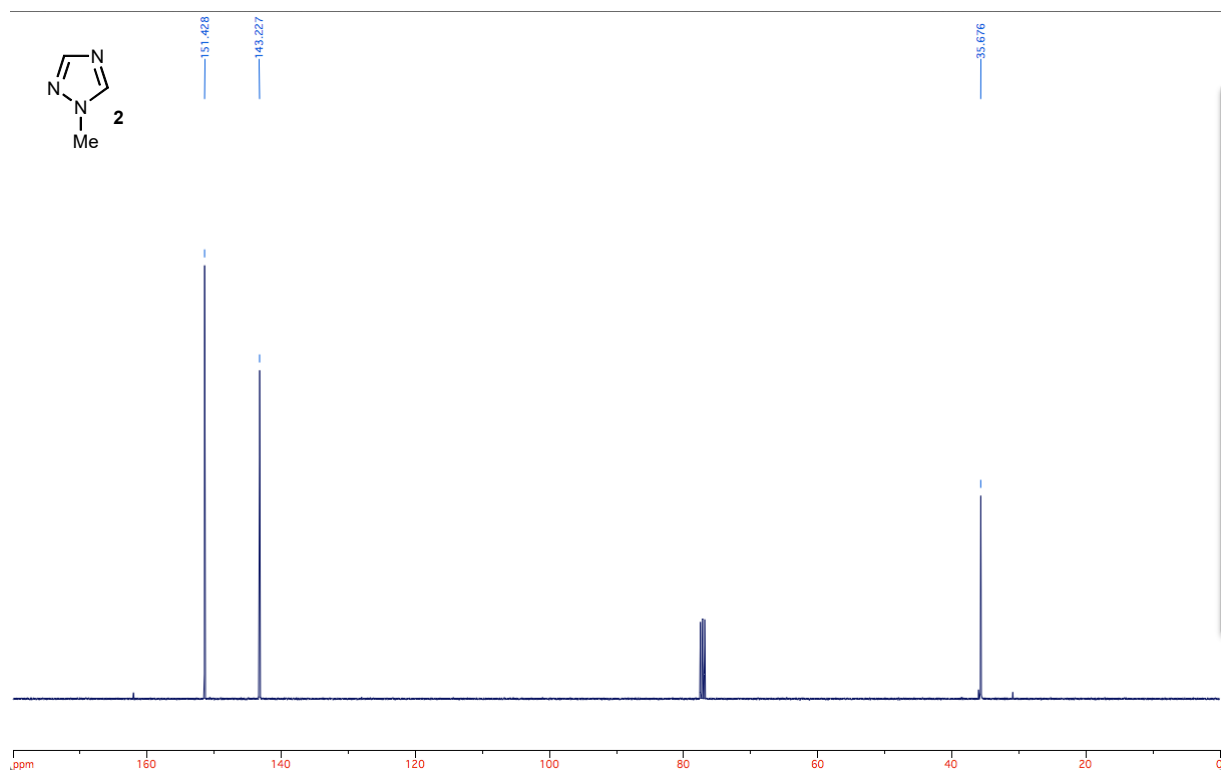

Fig. S2. <sup>13</sup>C NMR of 1-Methyl-1H-1,2,4-triazole (2).

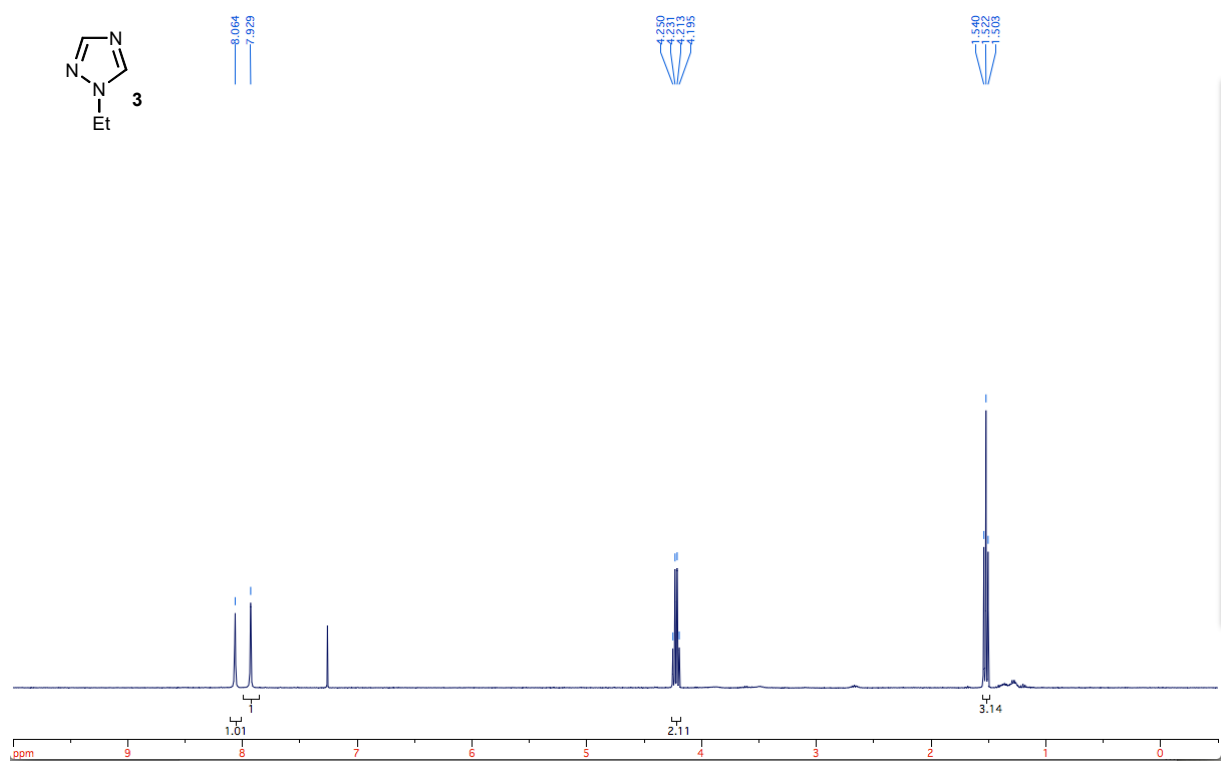

Fig. S3. <sup>1</sup>H NMR of 1-Ethyl-1H-1,2,4-triazole (3).

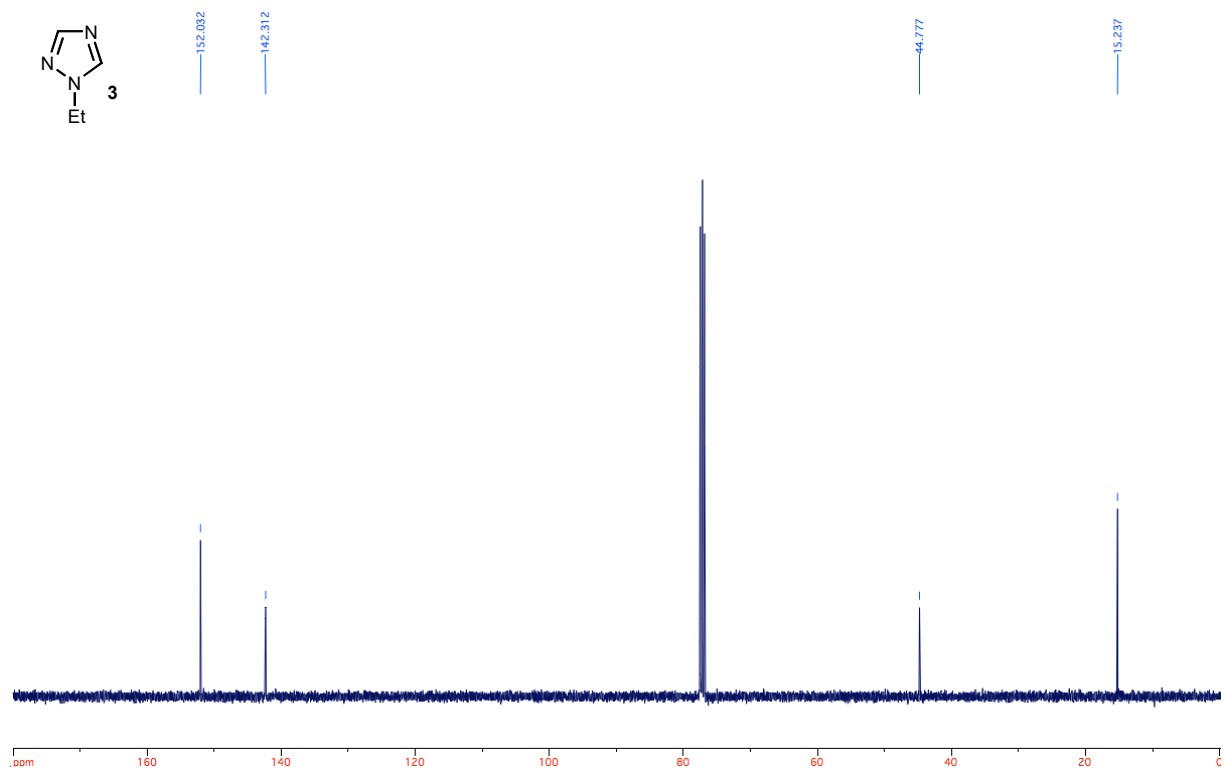

Fig. S4.  $^{13}\text{C}$  NMR of 1-Ethyl-1H-1,2,4-triazole (3).

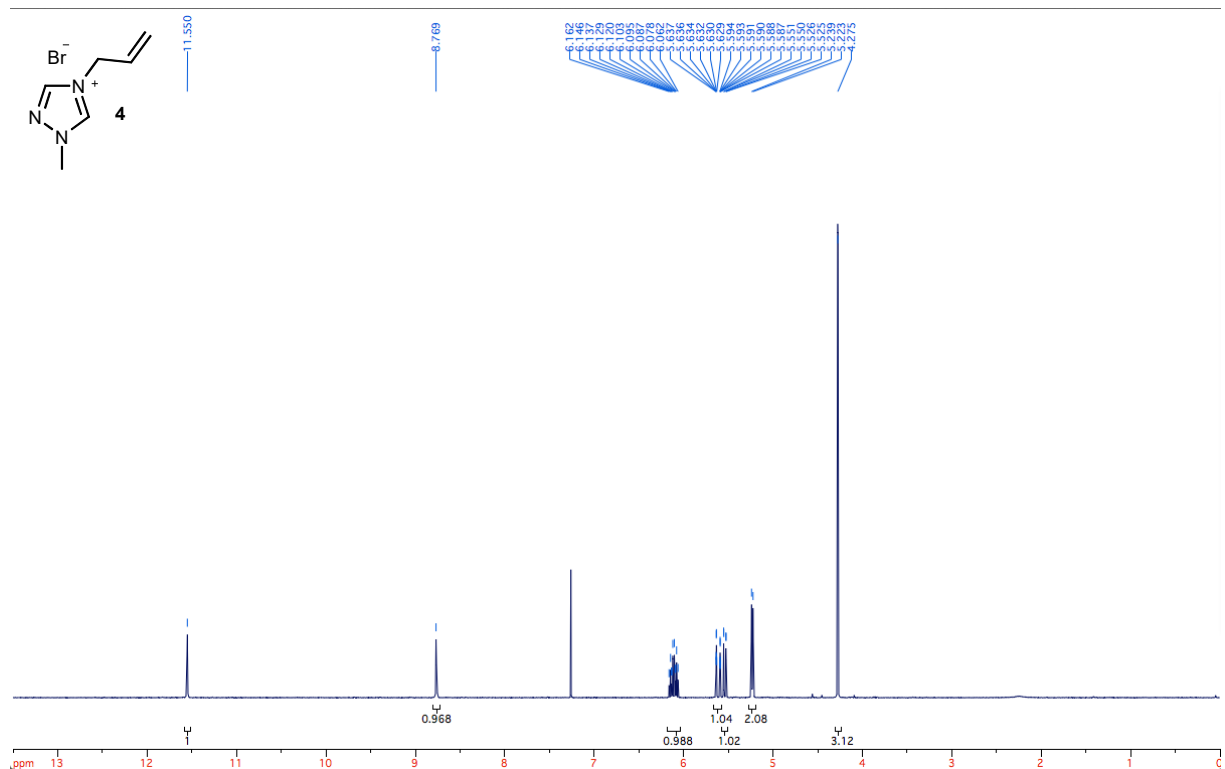

Fig. S5.  $^1\text{H}$  NMR of 4-Allyl-1-methyl-1H-1,2,4-triazol-4-ium (4).

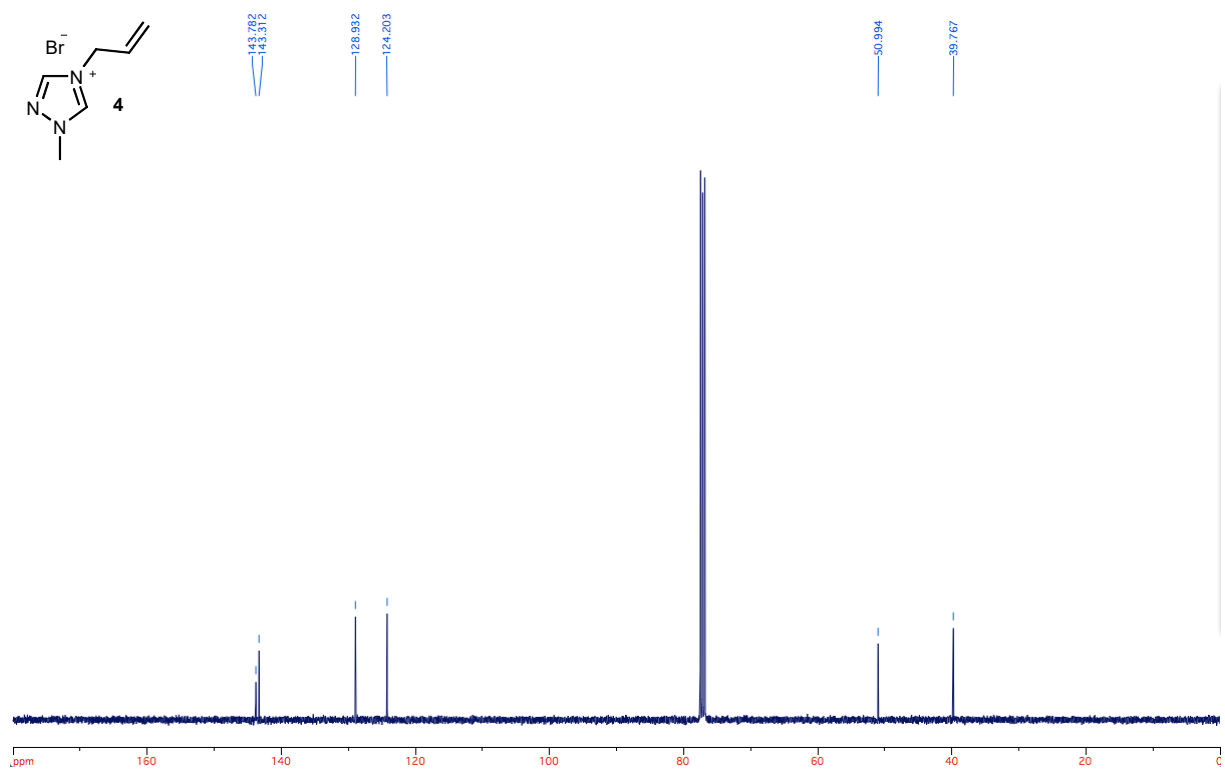

Fig. S6. <sup>13</sup>C NMR of 4-Allyl-1-methyl-1H-1,2,4-triazol-4-ium (4).

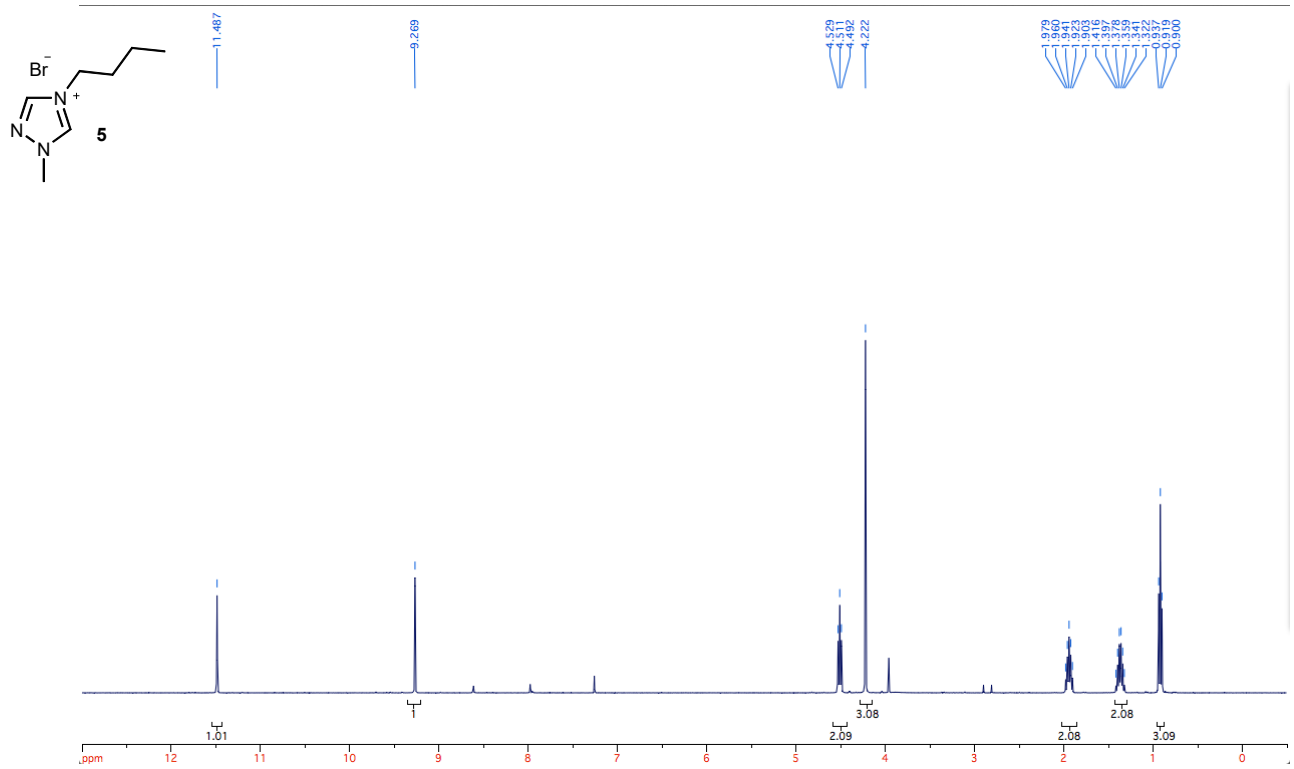

Fig. S7. <sup>1</sup>H NMR of 4-Butyl-1-methyl-1H-1,2,4-triazol-4-ium bromide (5).

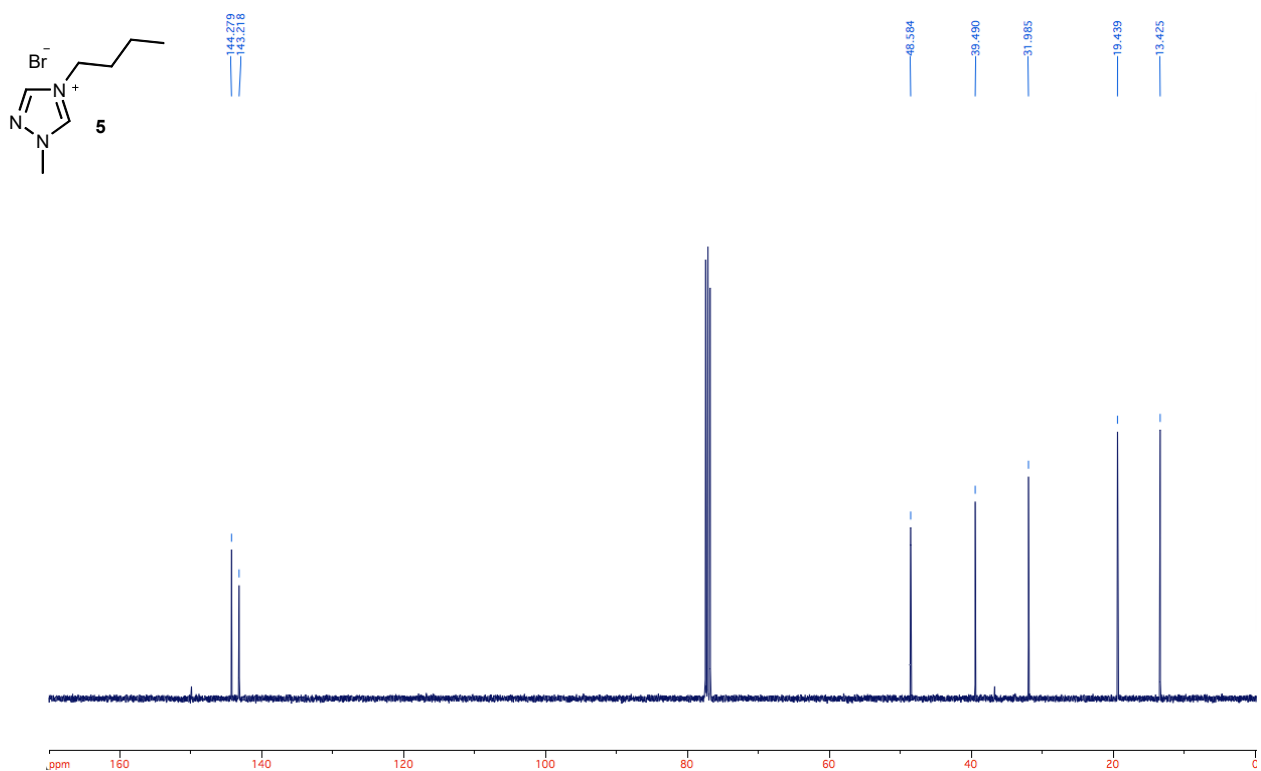

**Fig. S8.**  $^{13}\text{C}$  NMR of 4-Butyl-1-methyl-1*H*-1,2,4-triazol-4-ium bromide (5).

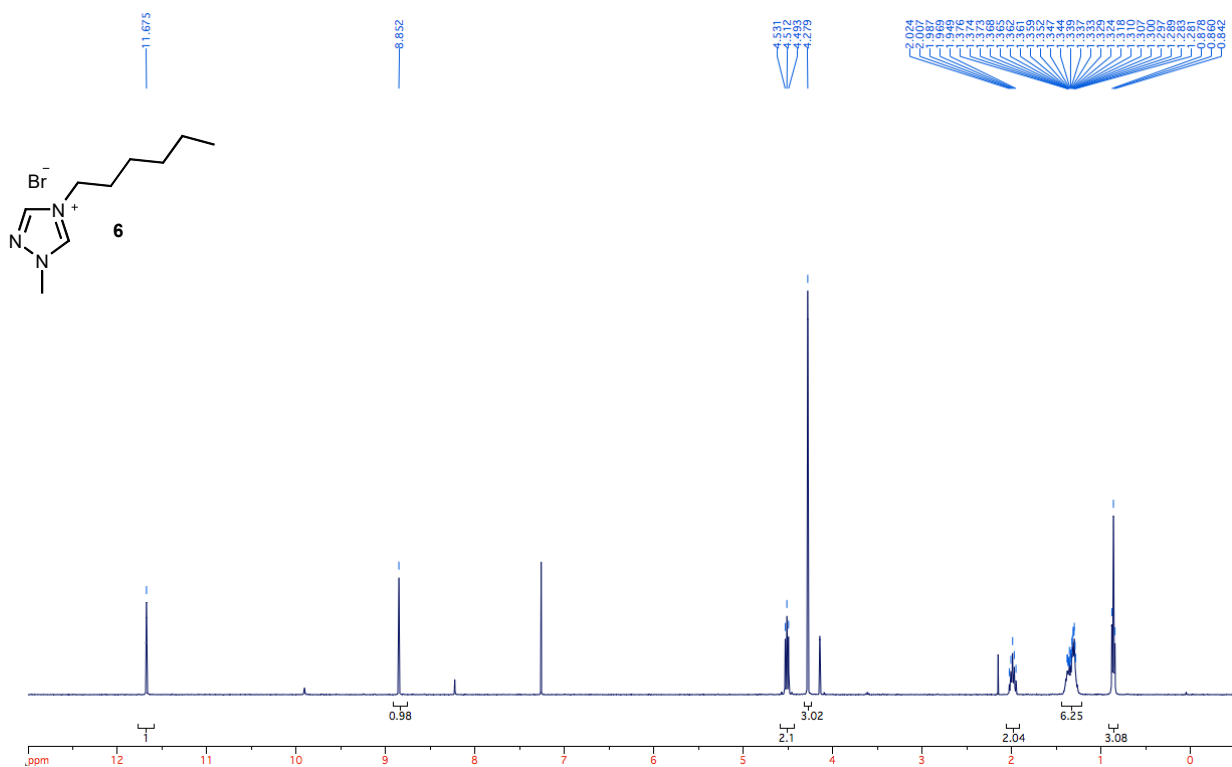

**Fig. S9.**  $^1\text{H}$  NMR of 4-Hexyl-1-methyl-1*H*-1,2,4-triazol-4-ium bromide (6).

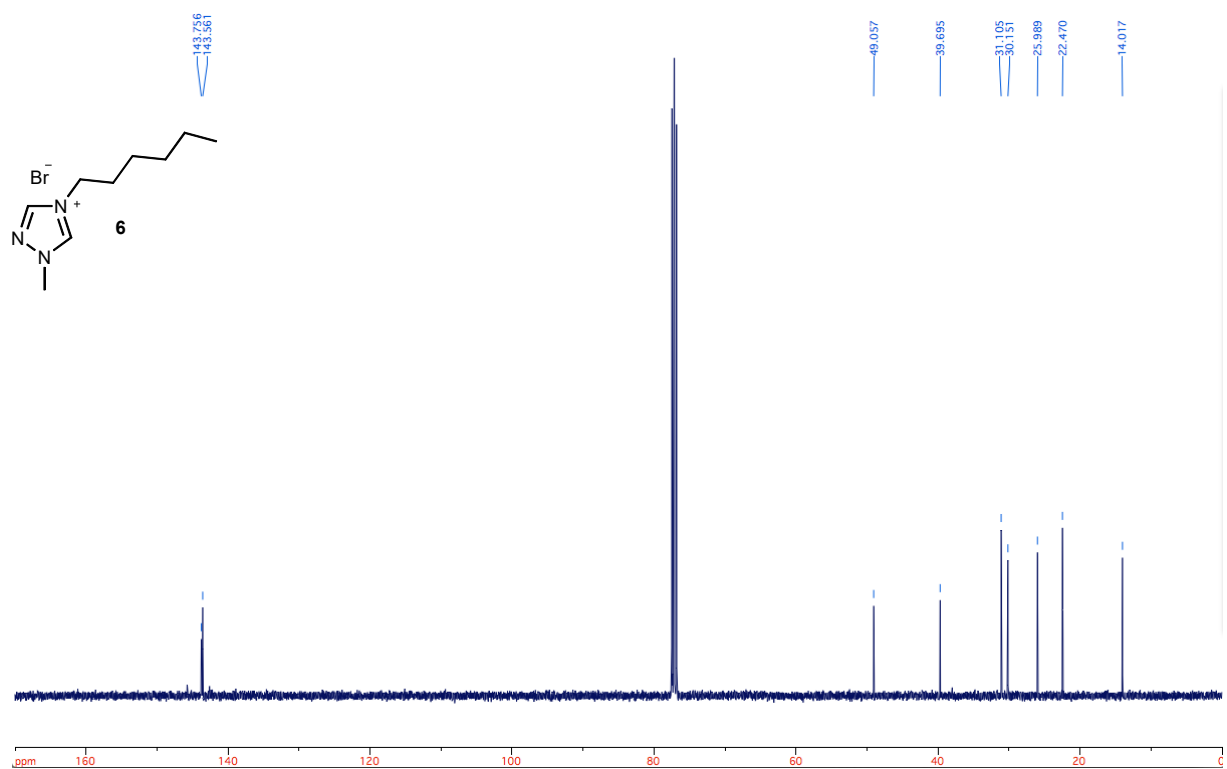

Fig. S10. <sup>13</sup>C NMR of 4-Hexyl-1-methyl-1H-1,2,4-triazol-4-ium (6).

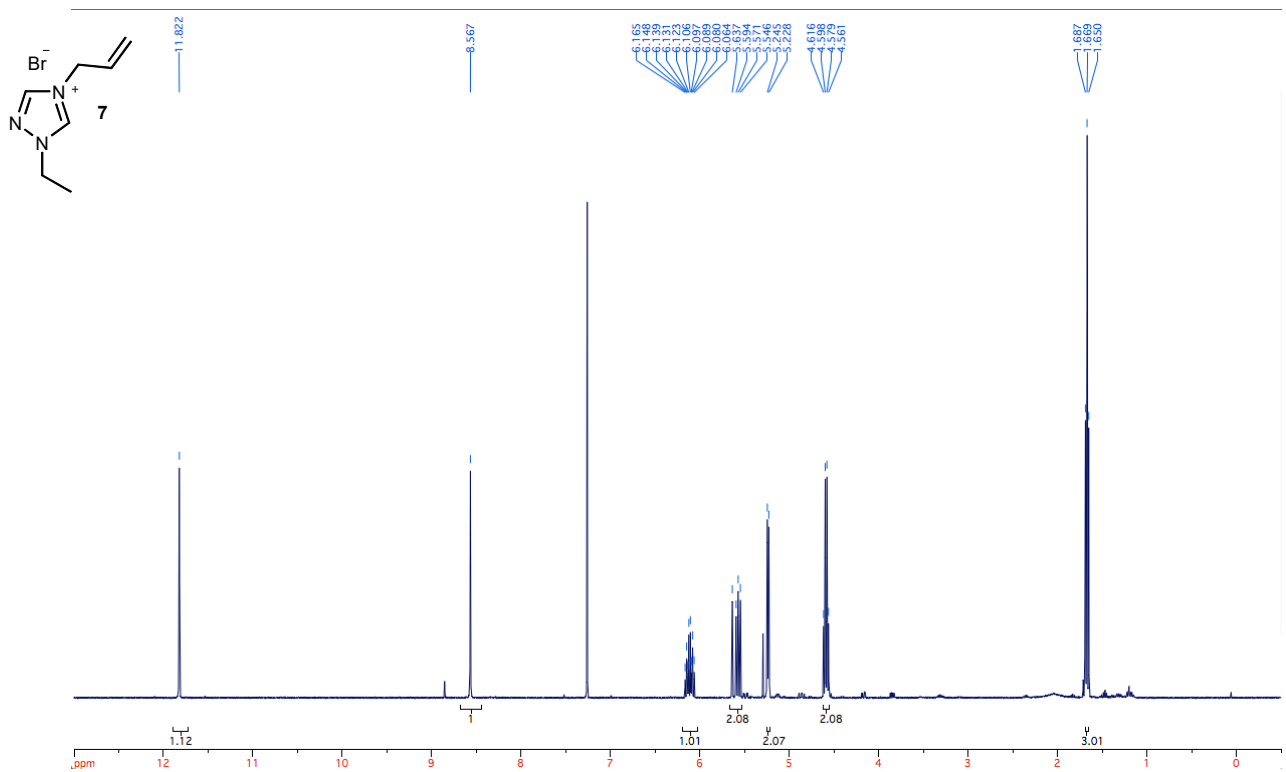

Fig. S11. <sup>1</sup>H NMR of 4-Allyl-1-ethyl-1H-1,2,4-triazol-4-ium bromide (7).

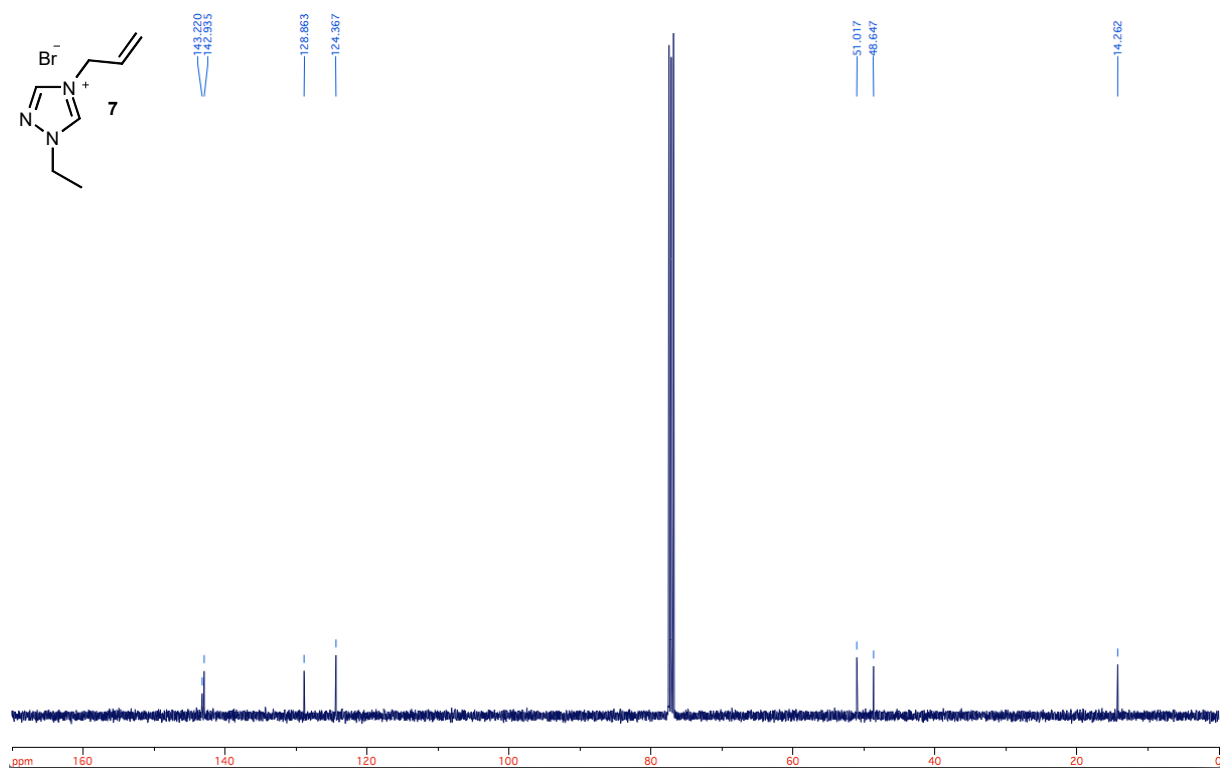

Fig. S12. <sup>13</sup>C NMR of 4-Allyl-1-ethyl-1*H*-1,2,4-triazol-4-ium bromide (7).

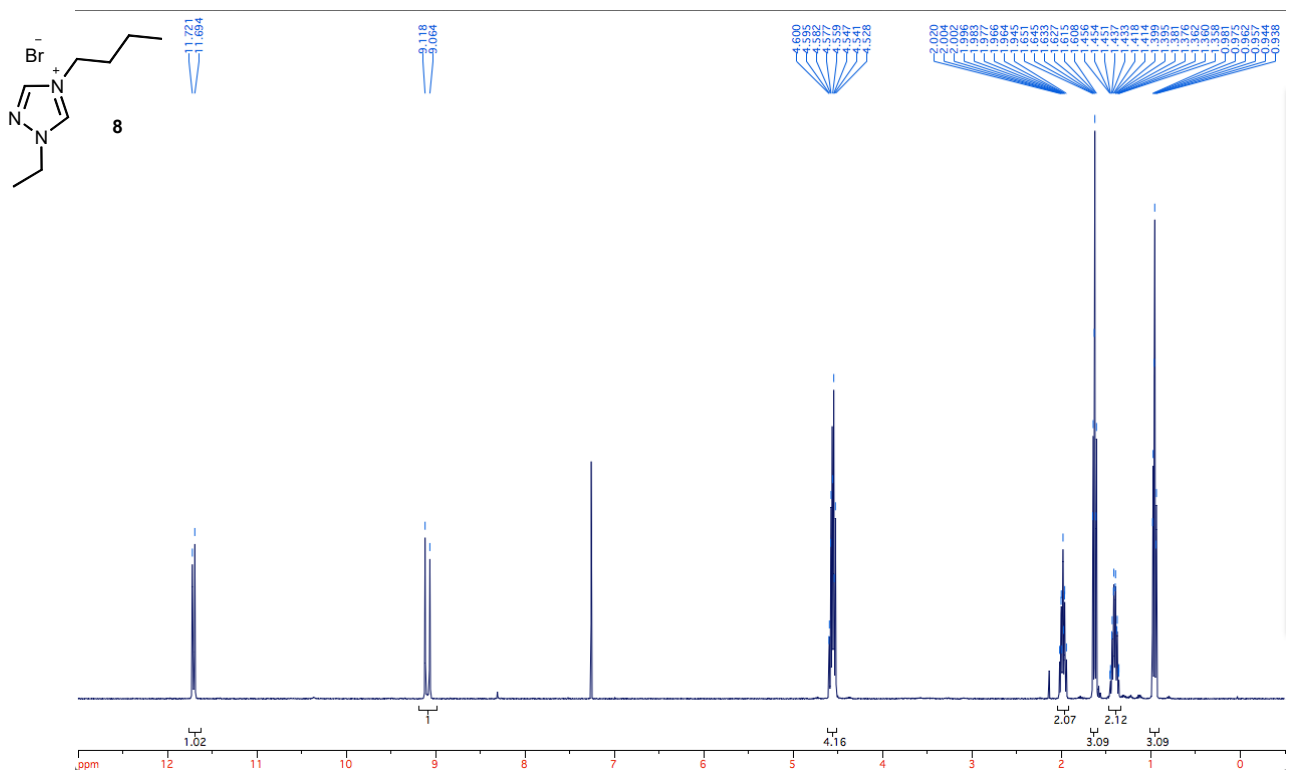

Fig. S13. <sup>1</sup>H NMR of 4-Butyl-1-ethyl-1*H*-1,2,4-triazol-4-ium bromide (8).

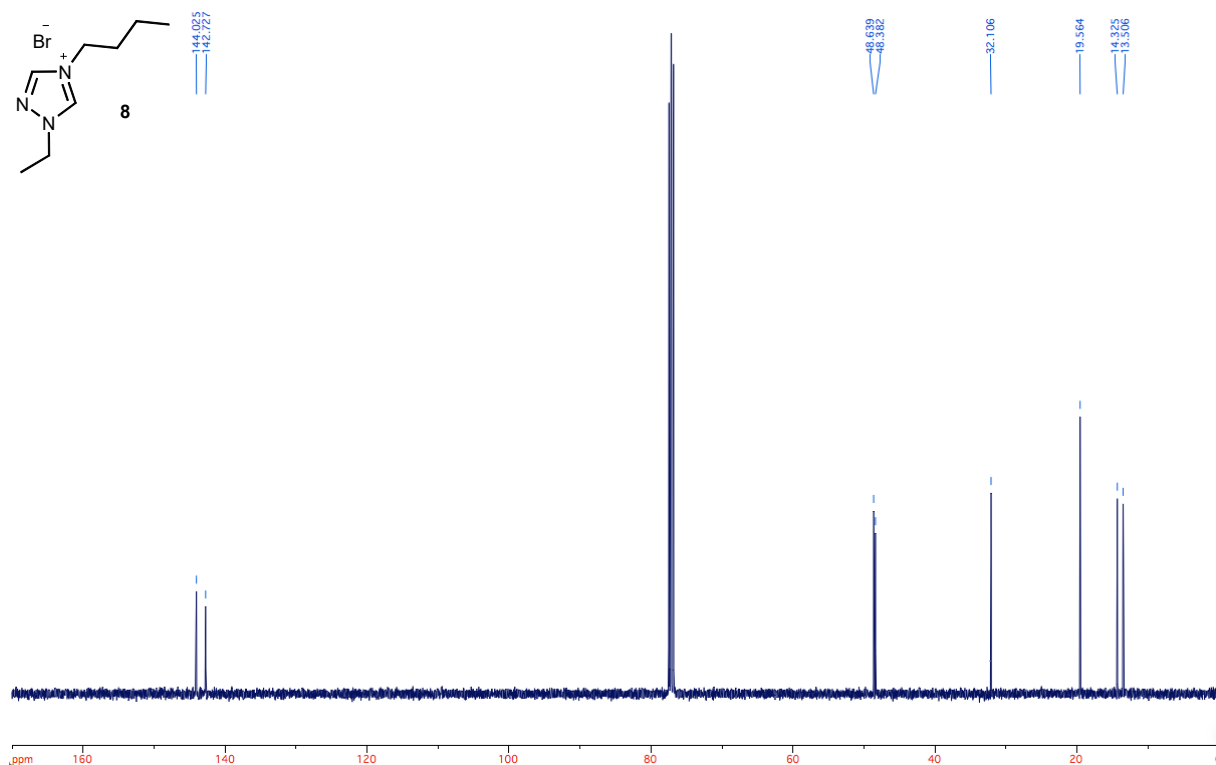

**Fig. S14.** <sup>13</sup>C NMR of 4-Butyl-1-ethyl-1*H*-1,2,4-triazol-4-ium bromide (8).

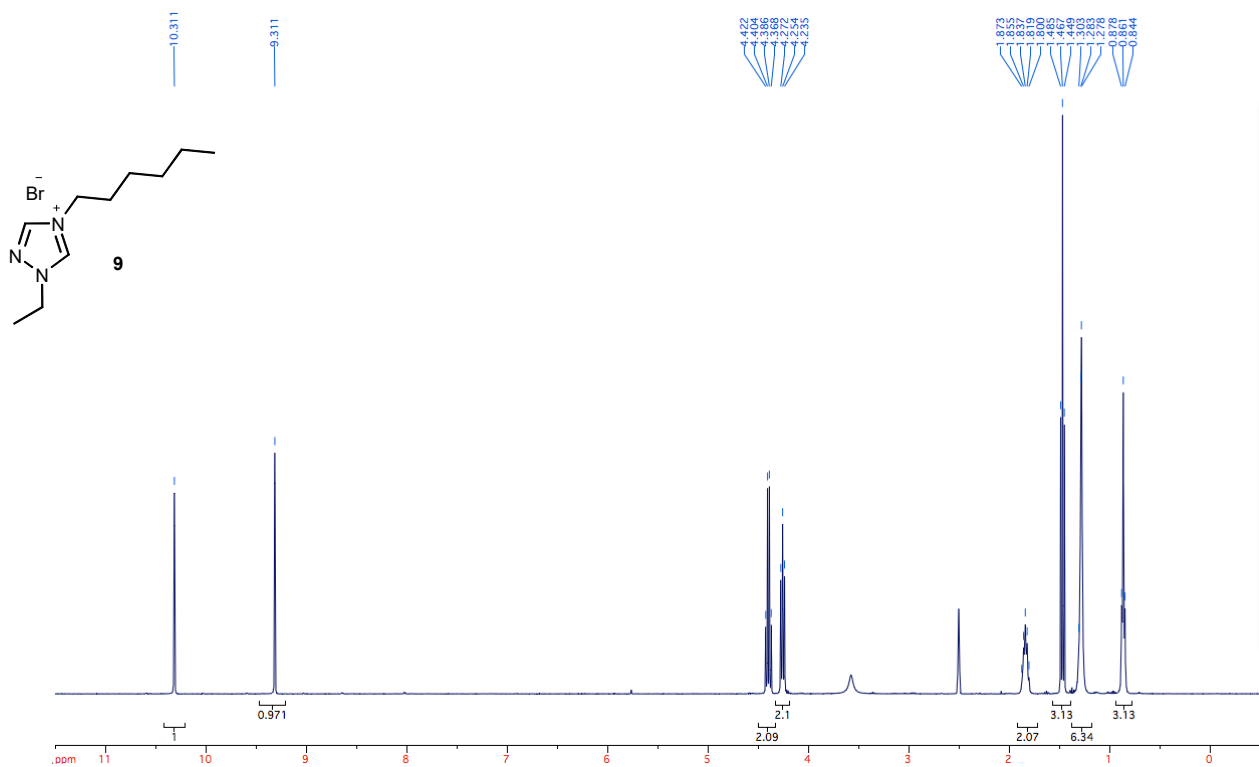

**Fig. S15.** <sup>1</sup>H NMR of 1-Ethyl-4-hexyl-1*H*-1,2,4-triazol-4-ium bromide (9).

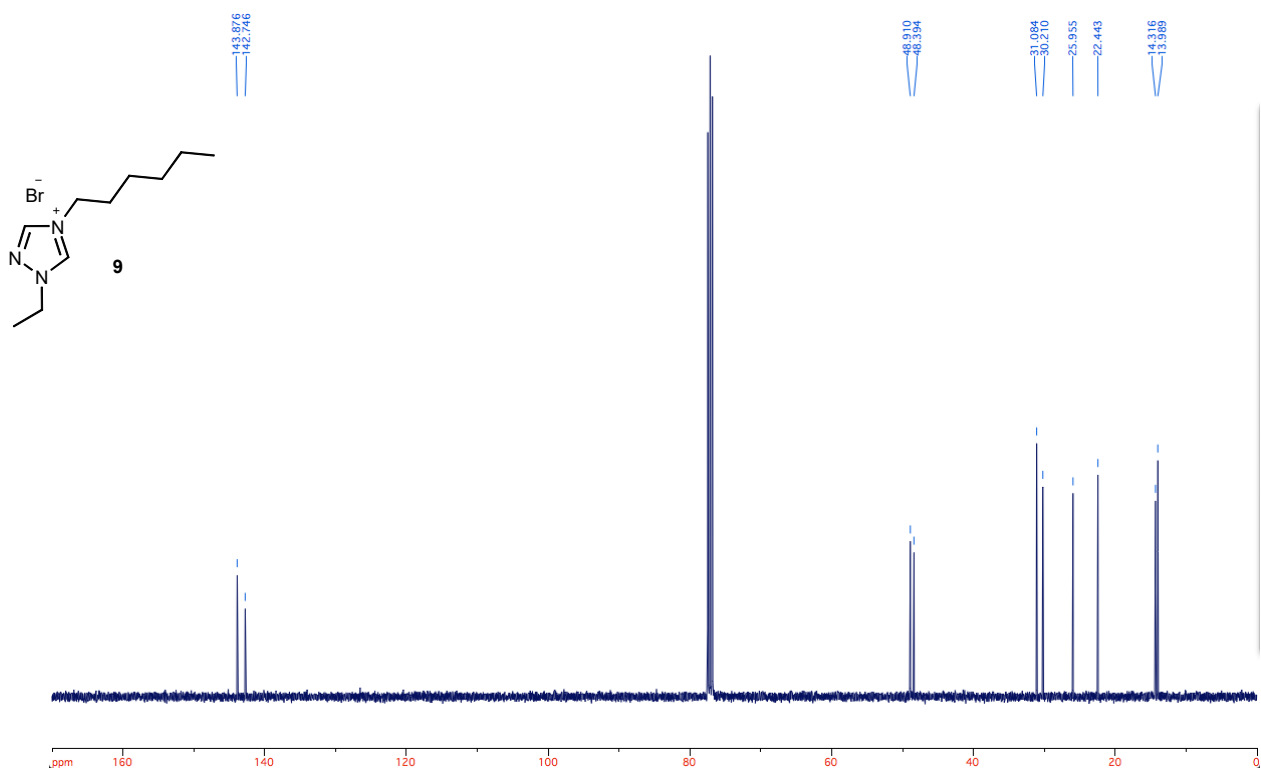

Fig. S16.  $^{13}\text{C}$  NMR of 1-Ethyl-4-hexyl-1H-1,2,4-triazol-4-ium bromide (**9**).

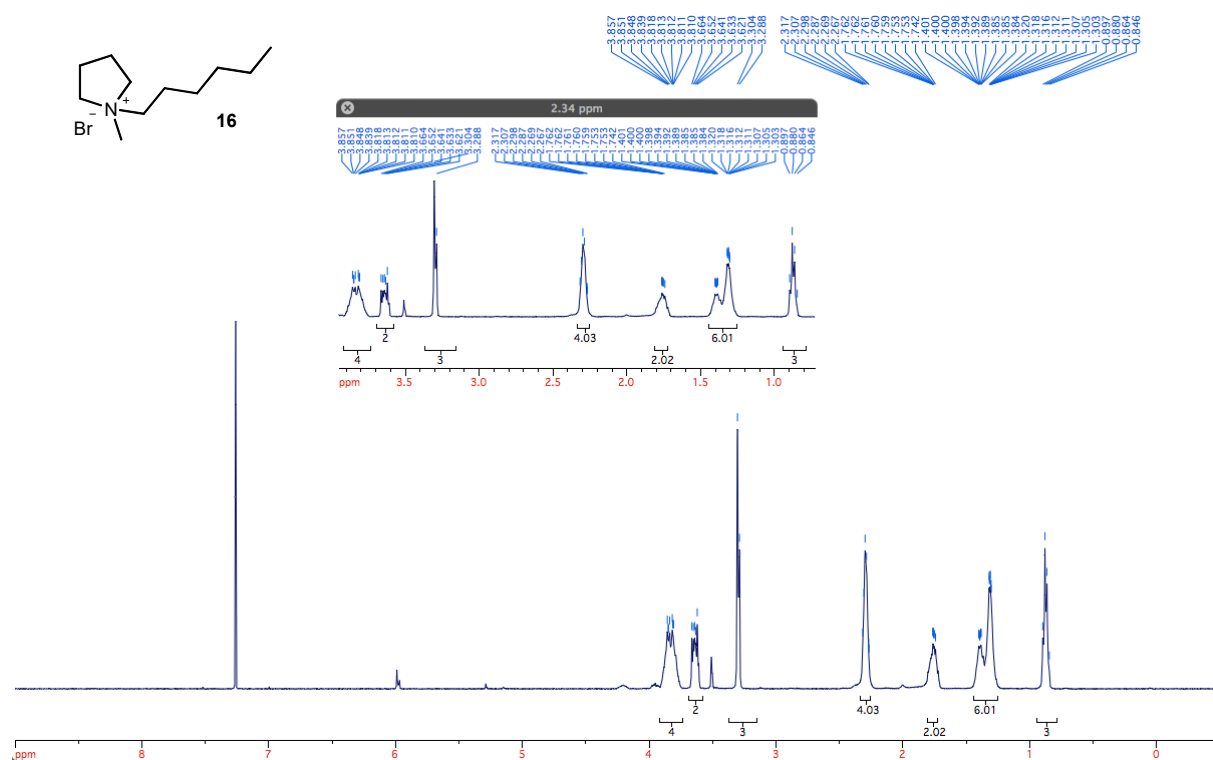

Fig. S17.  $^1\text{H}$  NMR of 1-Hexyl-1-methylpyrrolidin-1-ium bromide (**16**).



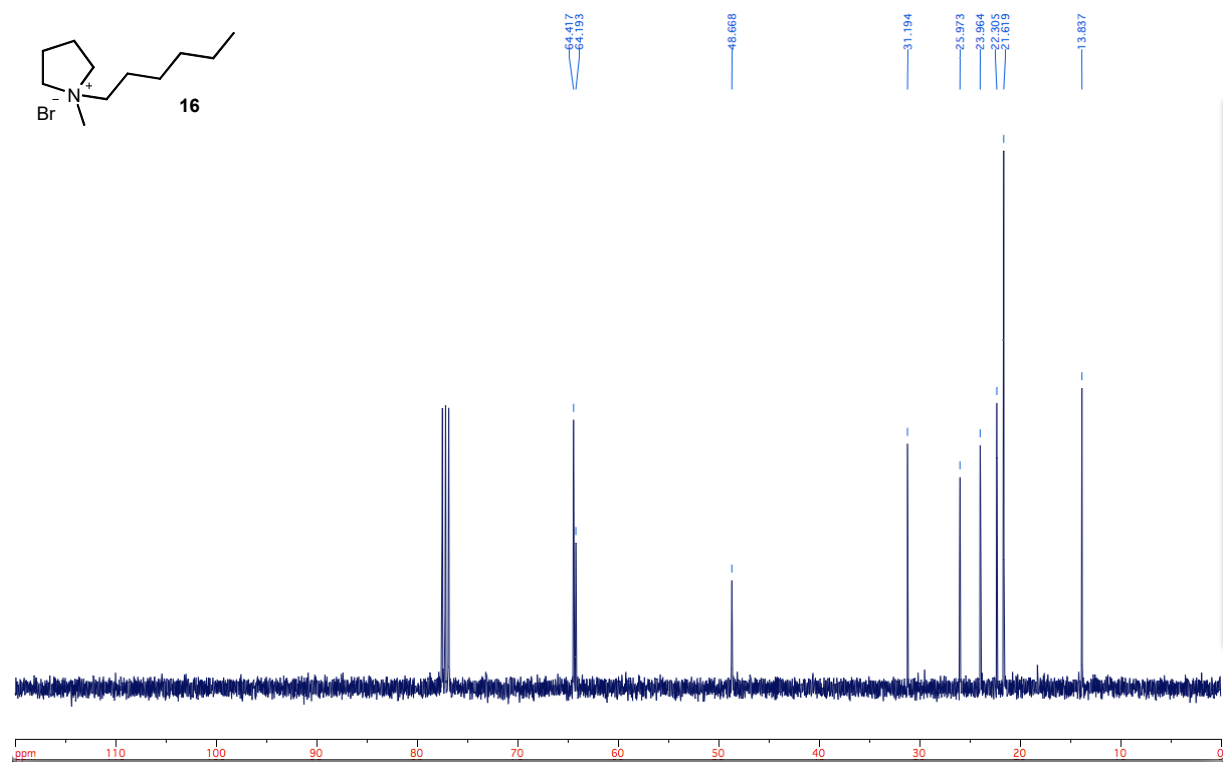

**Fig. S18.** <sup>13</sup>C NMR of 1-Hexyl-1-methylpyrrolidin-1-ium bromide (**16**).

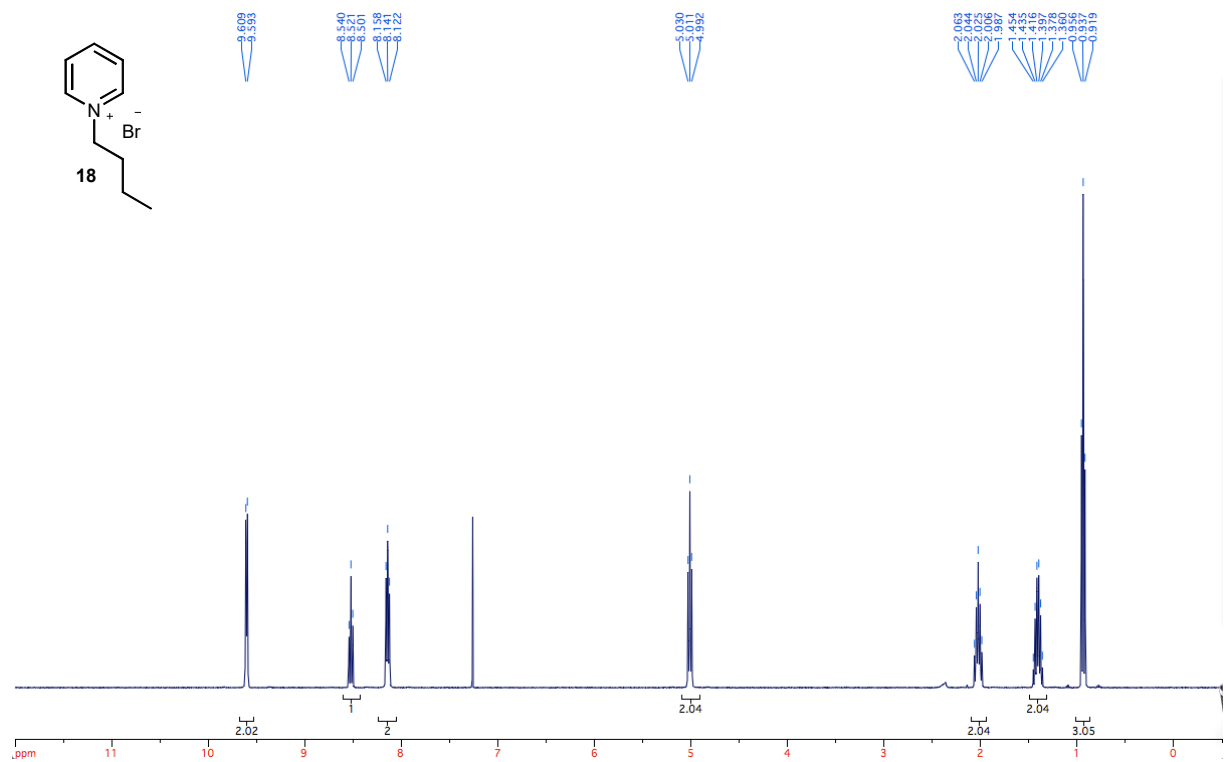

**Fig. S19.** <sup>1</sup>H NMR of 1-Butylpyridin-1-ium bromide (**18**).

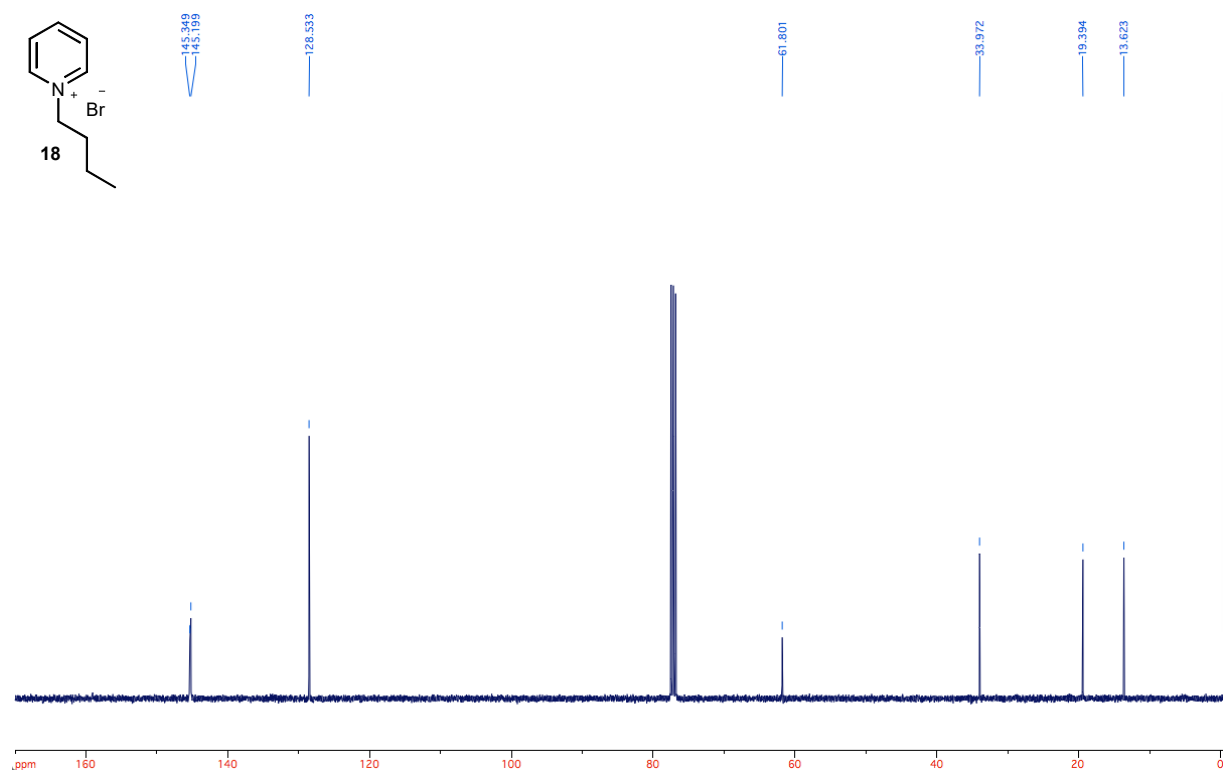

**Fig. S20.**  $^{13}\text{C}$  NMR of 1-Butylpyridin-1-ium bromide (**18**).

**Characterization of the ionic liquids 10-15, 17, 19 and 20**

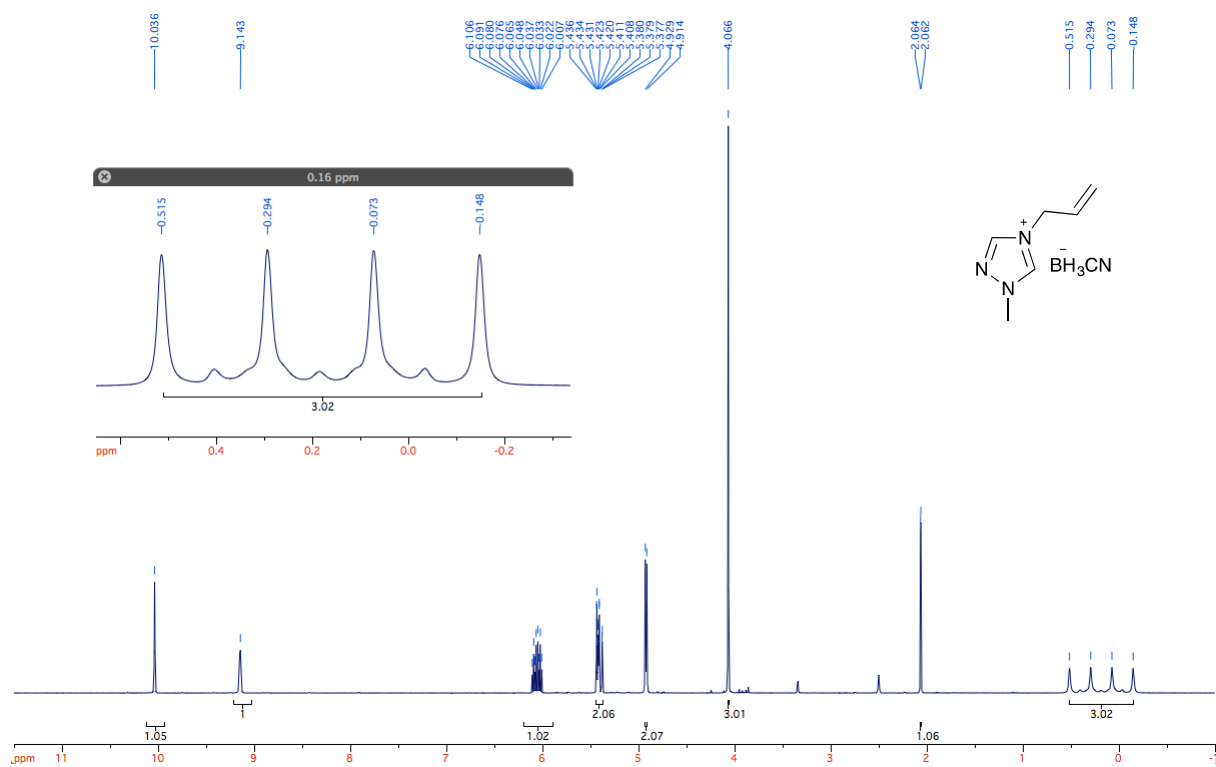

**Fig. S21.**  $^1\text{H}$  NMR of 4-Allyl-1-methyl-1*H*-1,2,4-triazol-4-ium cyanotrihydroborate (**10**).

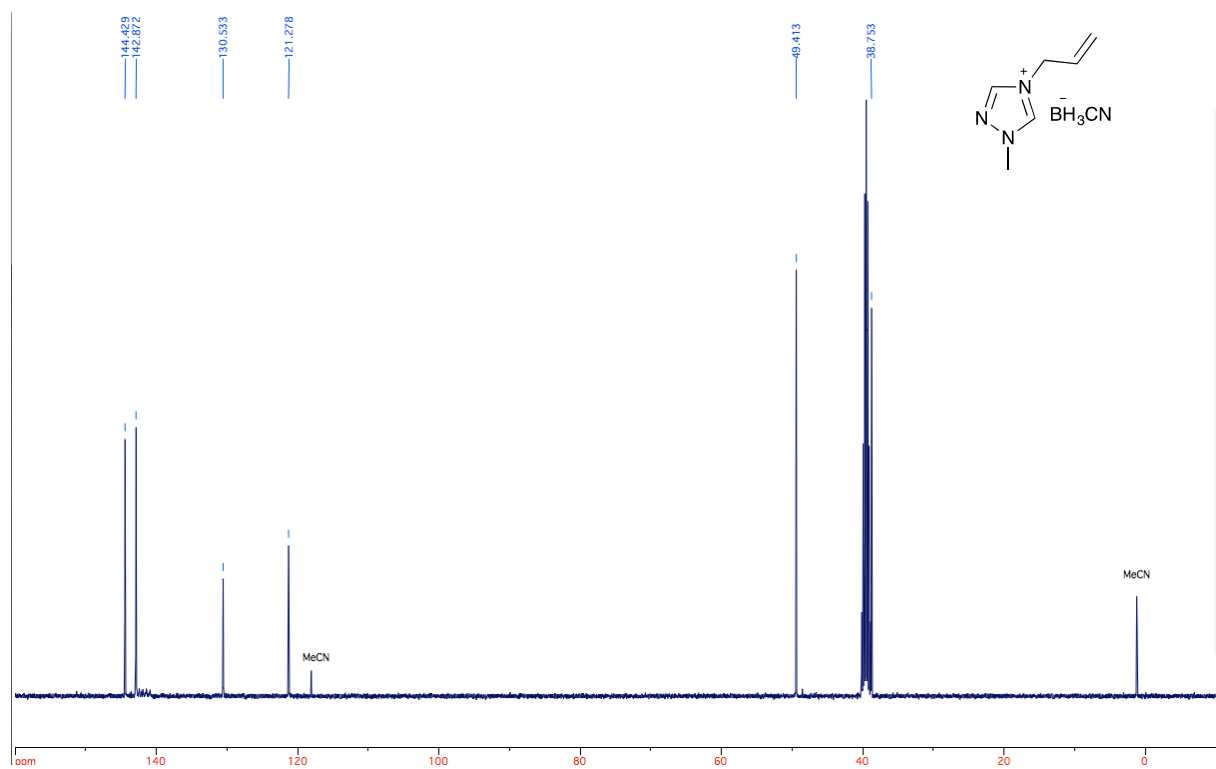

**Fig. S22.**  $^{13}\text{C}$  NMR of 4-Allyl-1-methyl-1*H*-1,2,4-triazol-4-ium cyanotrihydroborate (**10**).

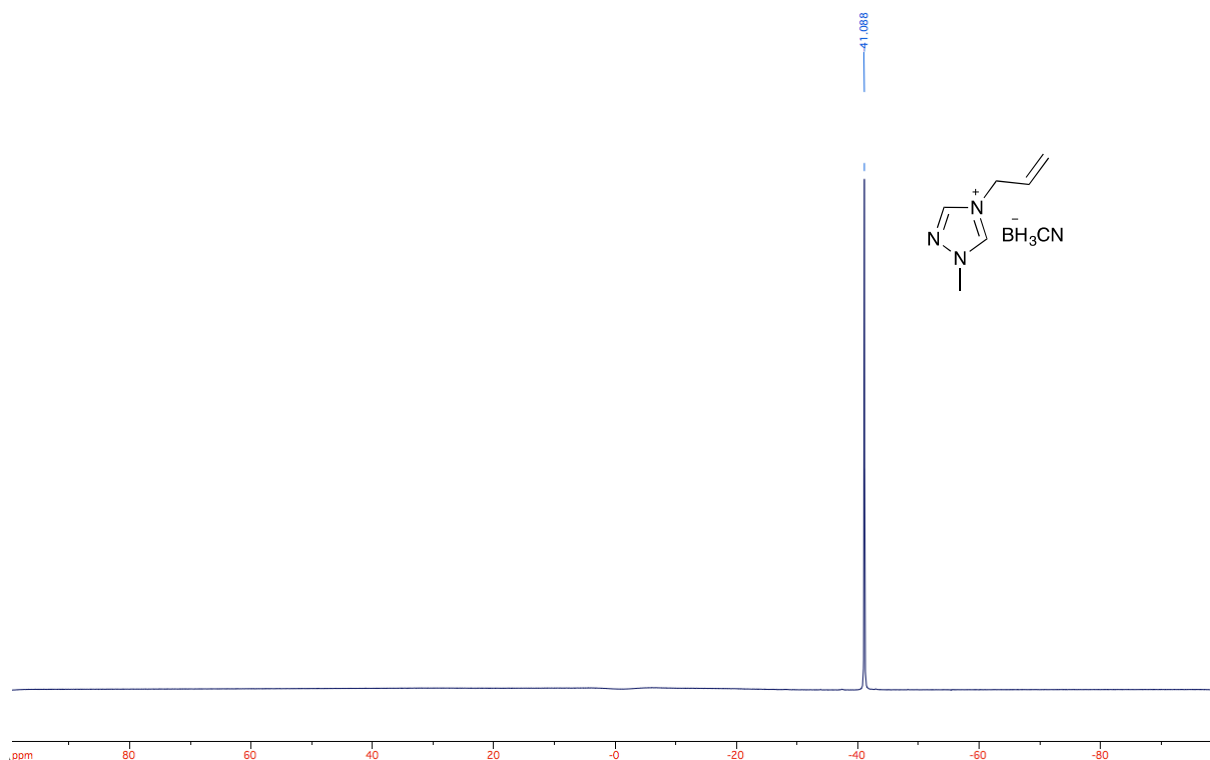

**Fig. S23.**  $^{11}\text{B}$  NMR of 4-Allyl-1-methyl-1H-1,2,4-triazol-4-ium cyanotrihydroborate (**10**).

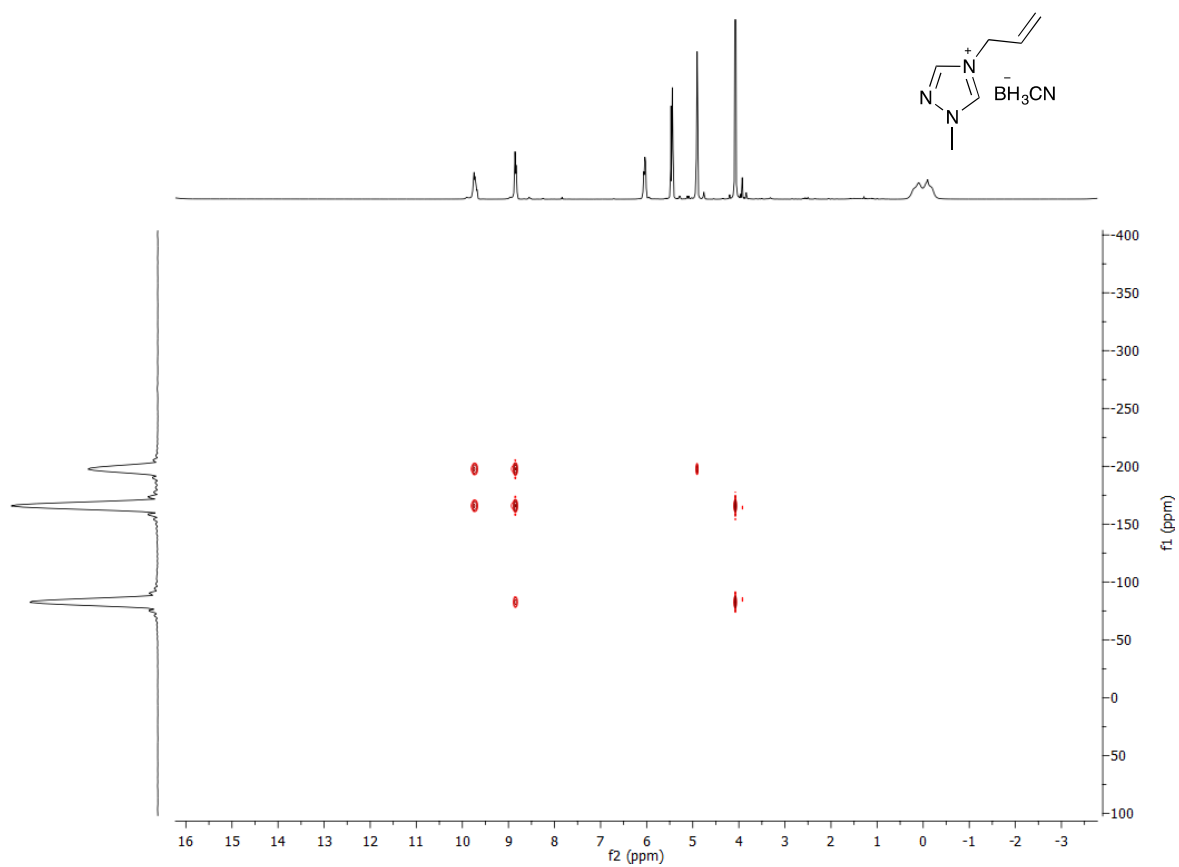

**Fig. S24.**  $^1\text{H}$ - $^{15}\text{N}$  HSQC of 4-Allyl-1-methyl-1H-1,2,4-triazol-4-ium cyanotrihydroborate (**10**).

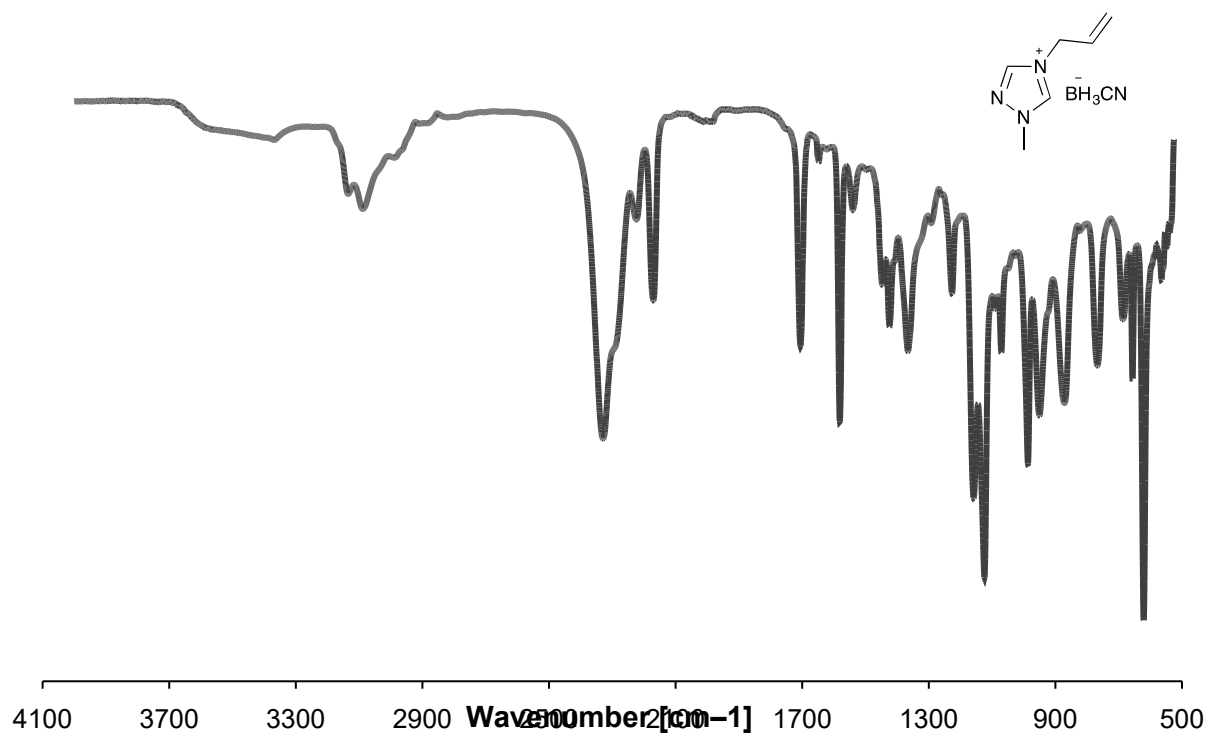

**Fig. S25.** IR Spectrum of 4-Allyl-1-methyl-1*H*-1,2,4-triazol-4-ium cyanotrihydroborate (**10**).

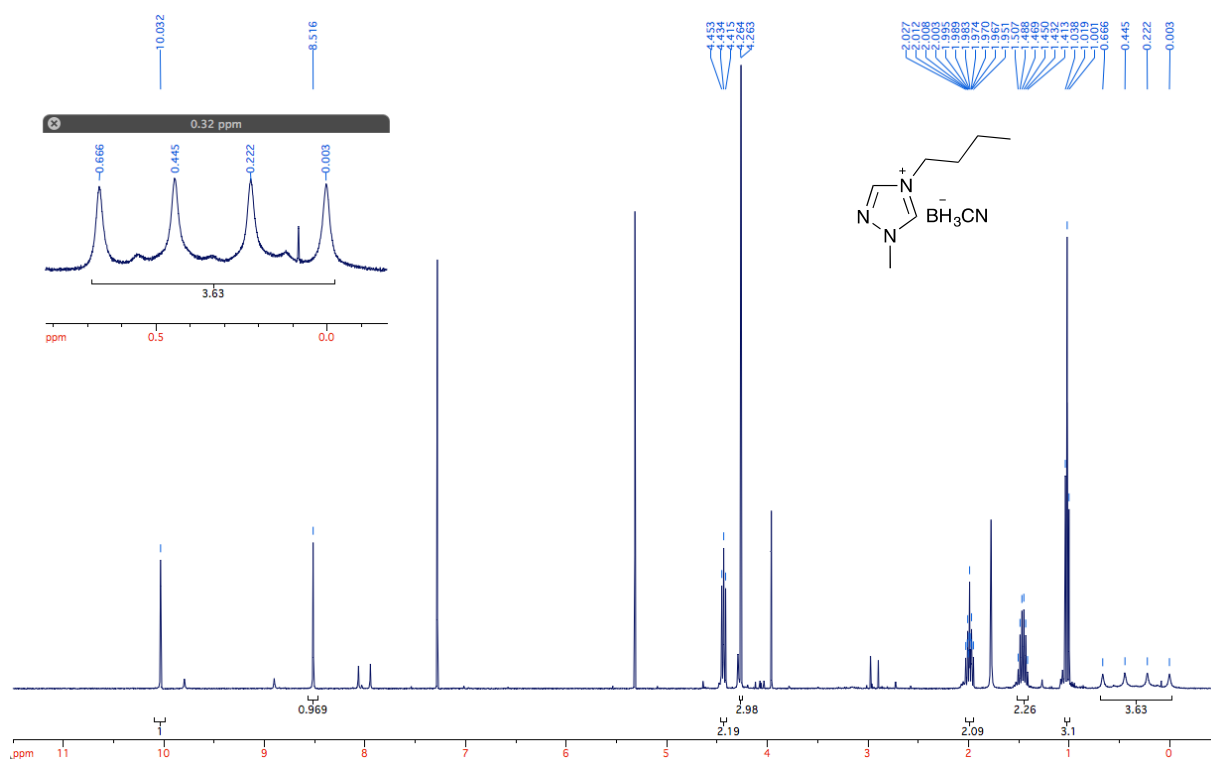

**Fig. S26.** <sup>1</sup>H NMR of 4-Butyl-1-methyl-1*H*-1,2,4-triazol-4-ium cyanotrihydroborate (**11**).

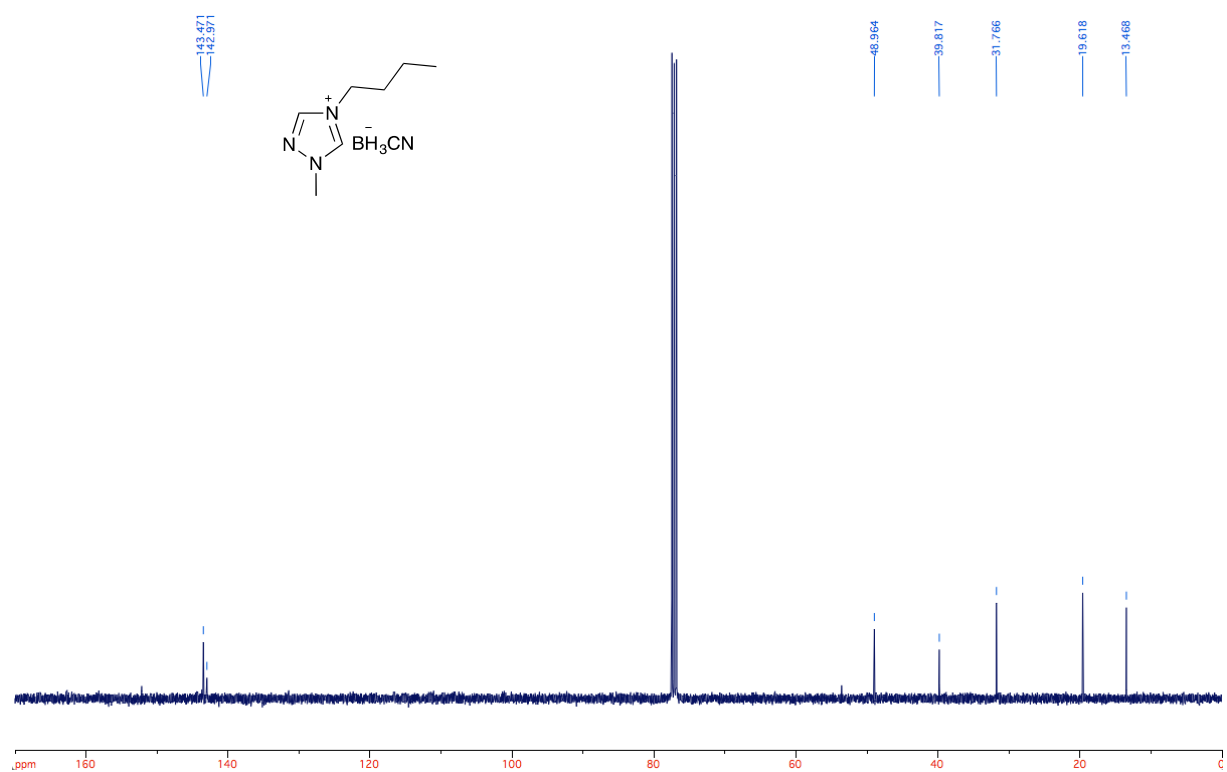

**Fig. S27.** <sup>13</sup>C NMR of 4-Butyl-1-methyl-1*H*-1,2,4-triazol-4-ium cyanotrihydroborate (11)

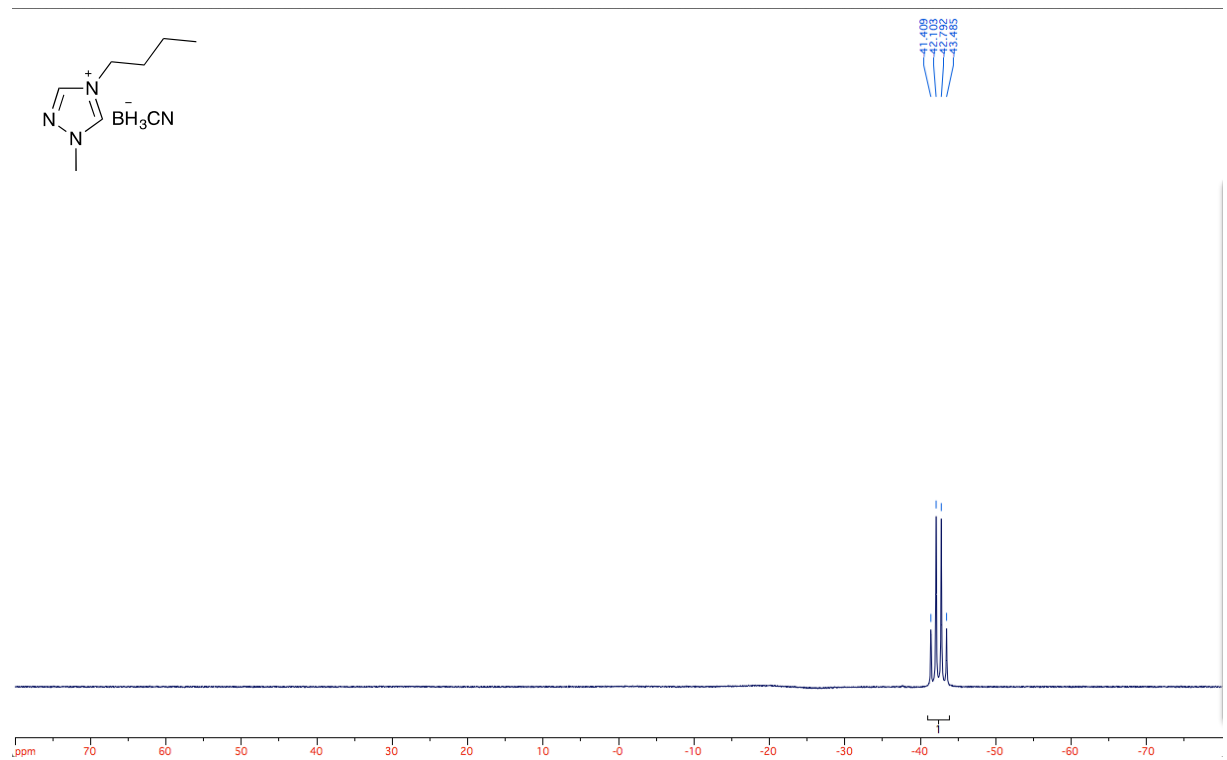

**Fig. S28.** <sup>11</sup>B NMR of 4-Butyl-1-methyl-1*H*-1,2,4-triazol-4-ium cyanotrihydroborate (11)

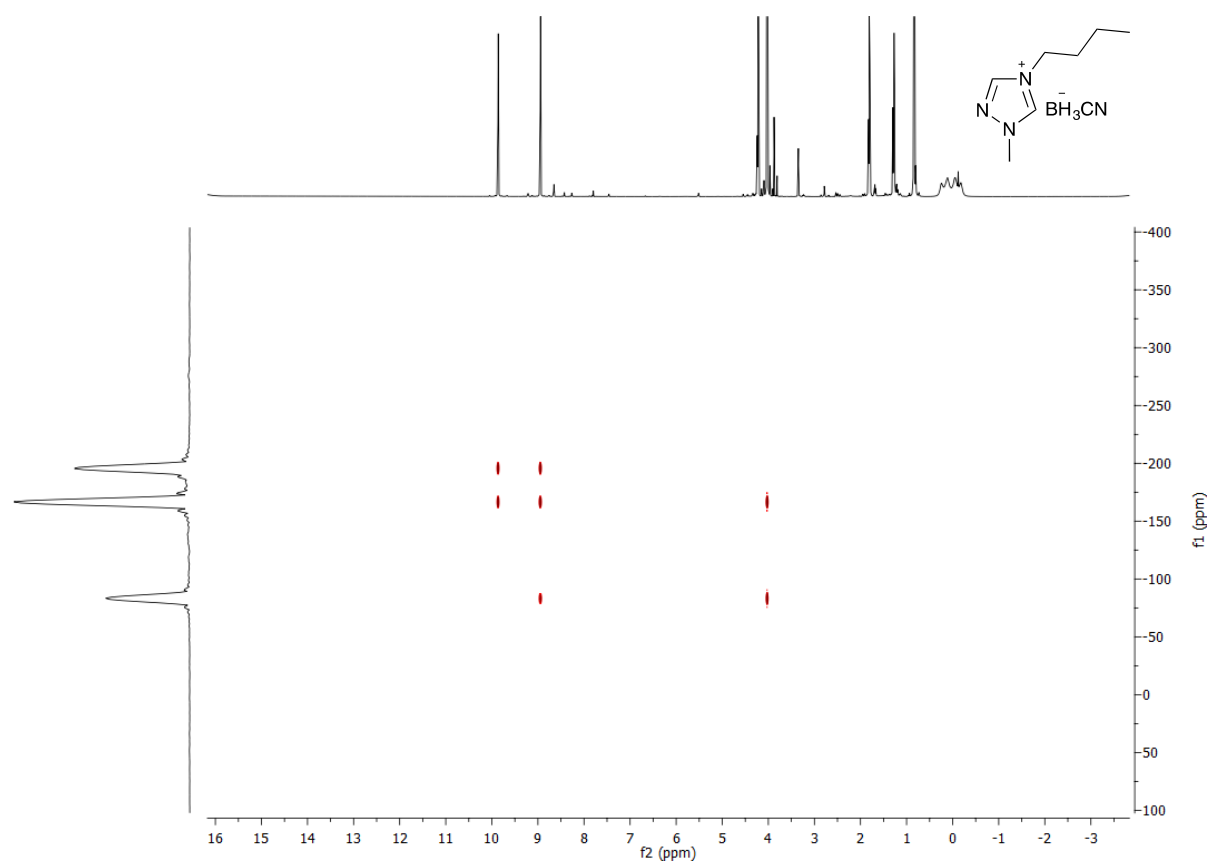

**Fig. S29.**  $^1\text{H}$ - $^{15}\text{N}$  HSQC of 4-Butyl-1-methyl-1*H*-1,2,4-triazol-4-ium cyanotrihydroborate (**11**).

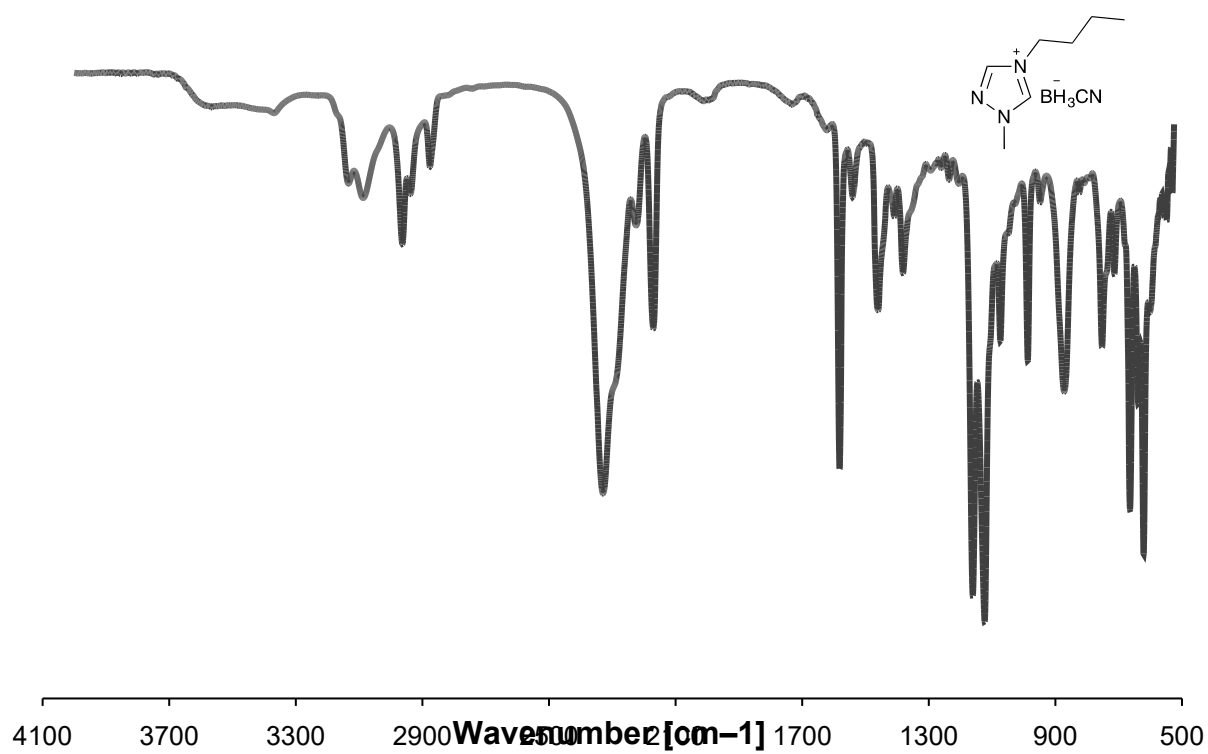

**Fig. S30.** IR Spectrum of 4-Butyl-1-methyl-1*H*-1,2,4-triazol-4-ium cyanotrihydroborate (**11**).

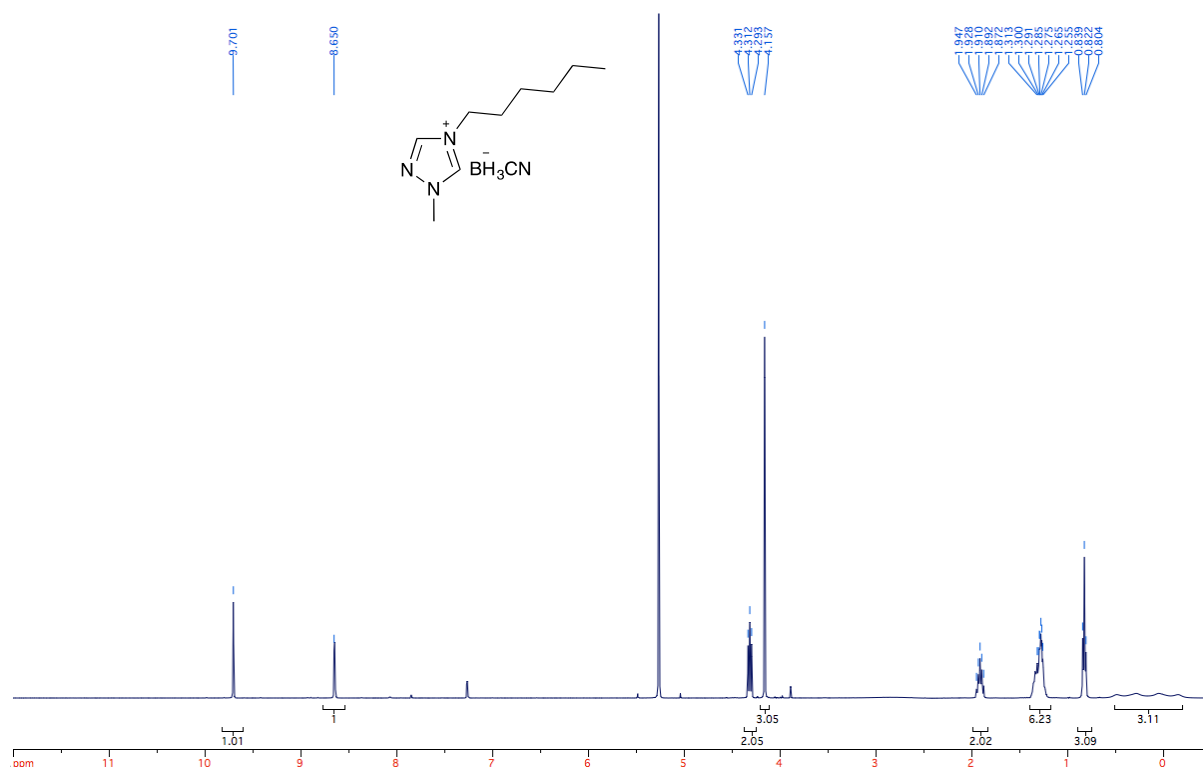

Fig. S31. <sup>1</sup>H NMR of 4-Hexyl-1-methyl-1H-1,2,4-triazol-4-ium cyanotrihydroborate (12).

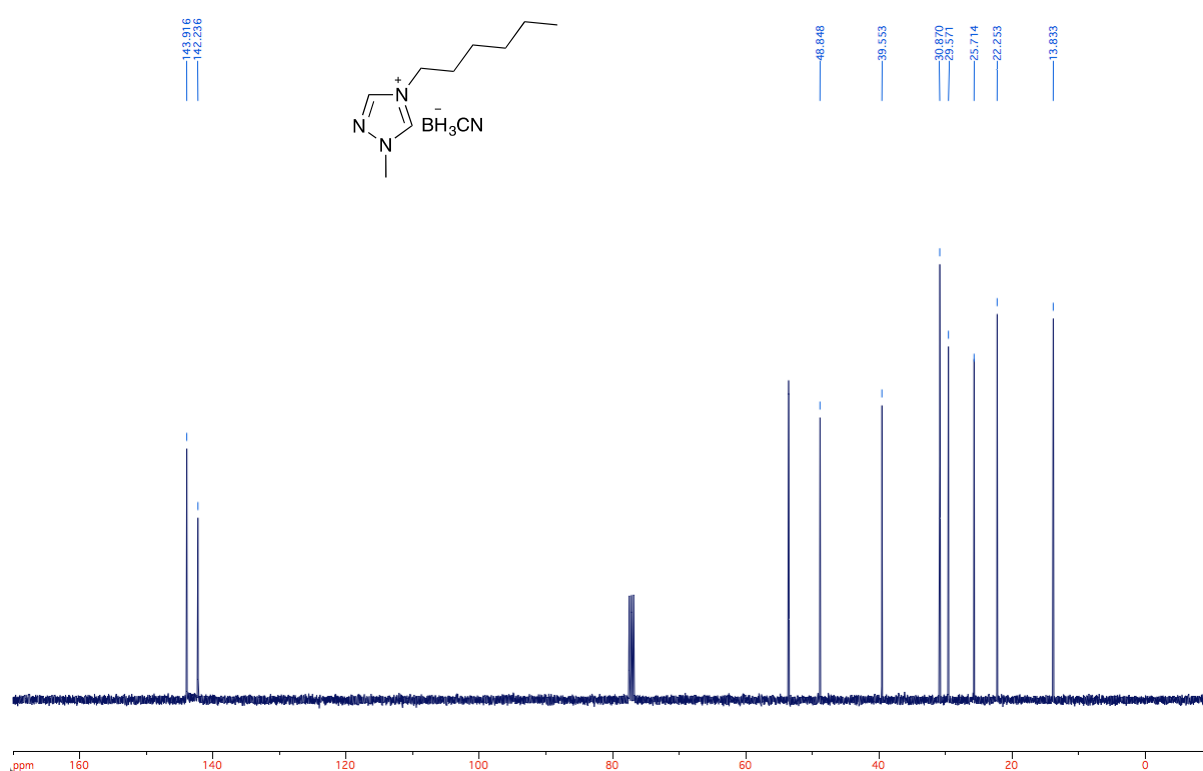

Fig. S32. <sup>13</sup>C NMR of 4-Hexyl-1-methyl-1H-1,2,4-triazol-4-ium cyanotrihydroborate (12).



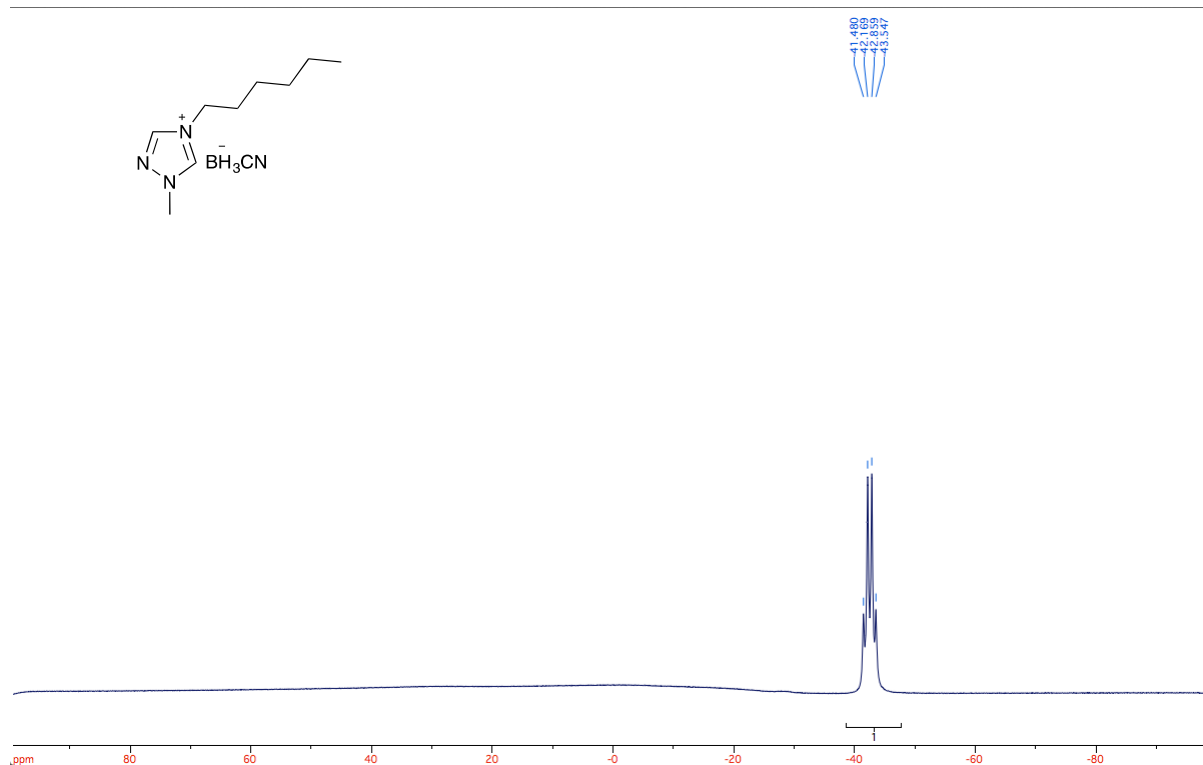

**Fig. S33.**  $^{11}\text{B}$  NMR of 4-Hexyl-1-methyl-1*H*-1,2,4-triazol-4-ium cyanotrihydroborate (**12**).

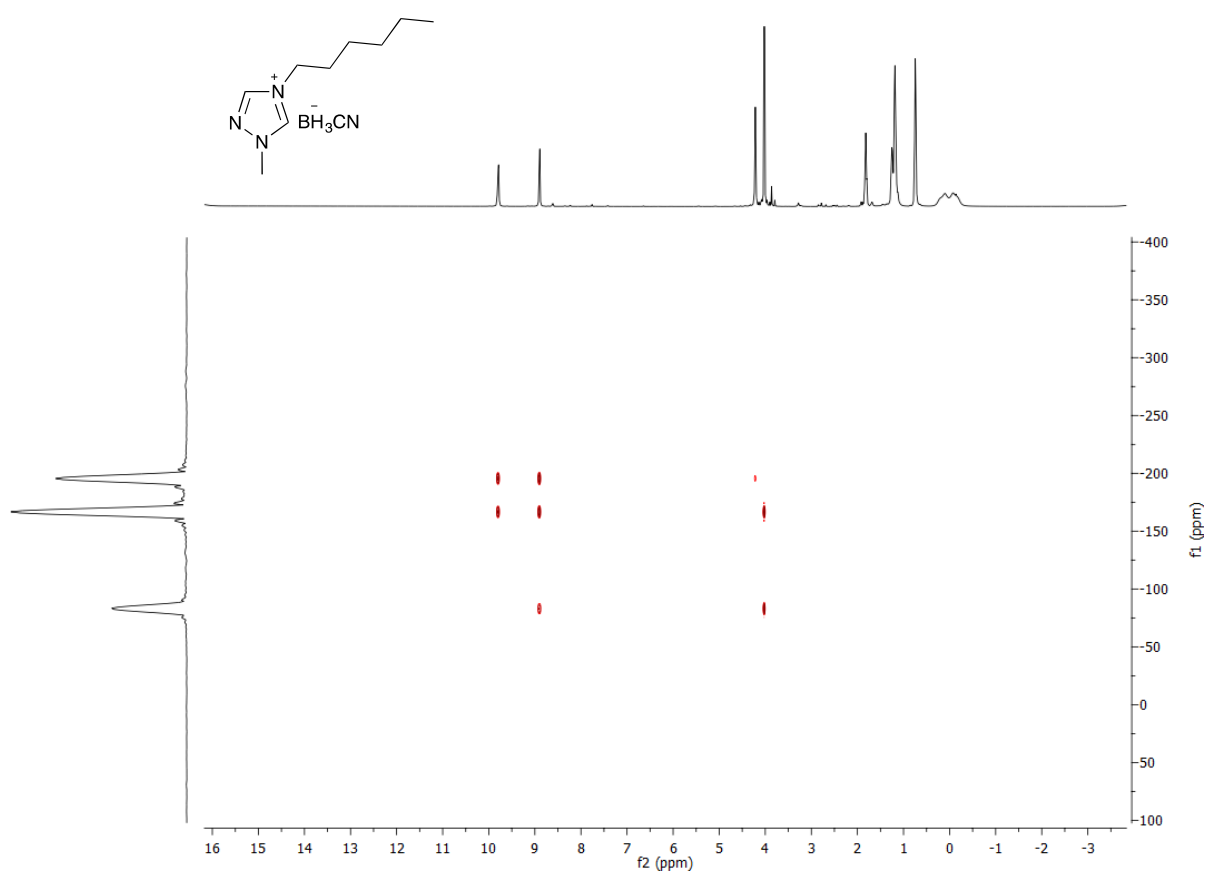

**Fig. S34.**  $^1\text{H}$ - $^{15}\text{N}$  HSQC of 4-Hexyl-1-methyl-1*H*-1,2,4-triazol-4-ium cyanotrihydroborate (**12**).

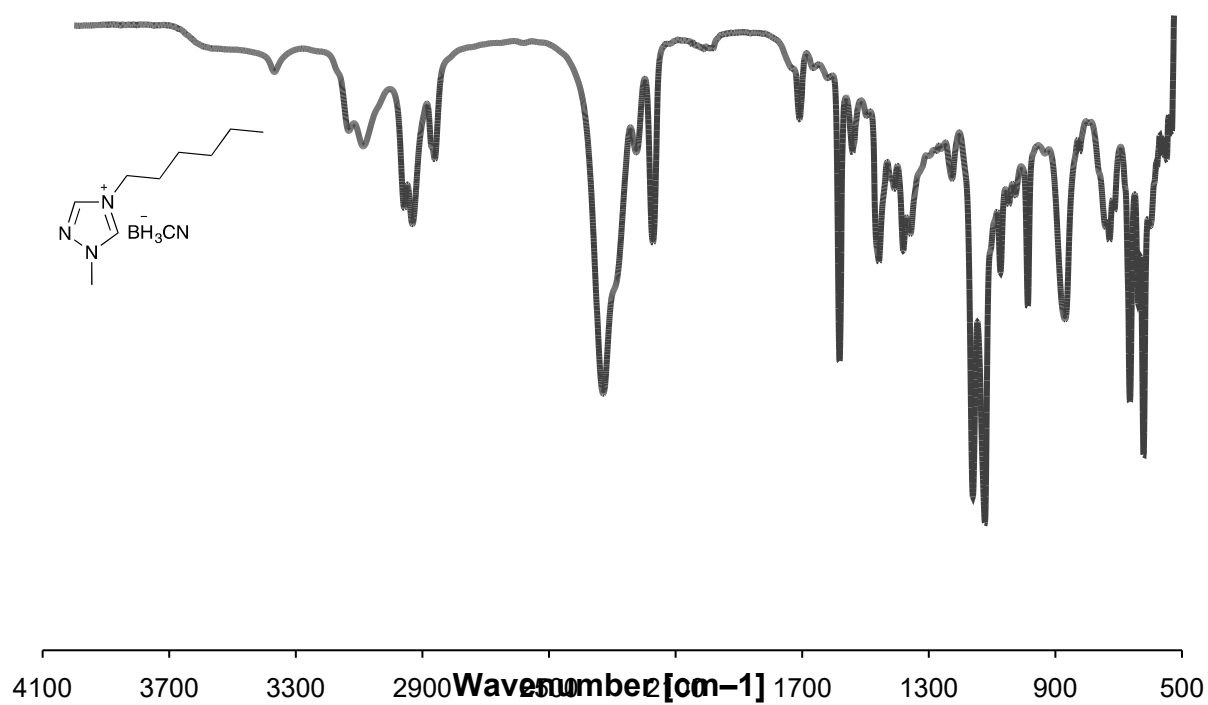

**Fig. S35.** IR Spectrum of 4-hexyl-1-methyl-1*H*-1,2,4-triazol-4-ium cyanotrihydroborate (**12**).

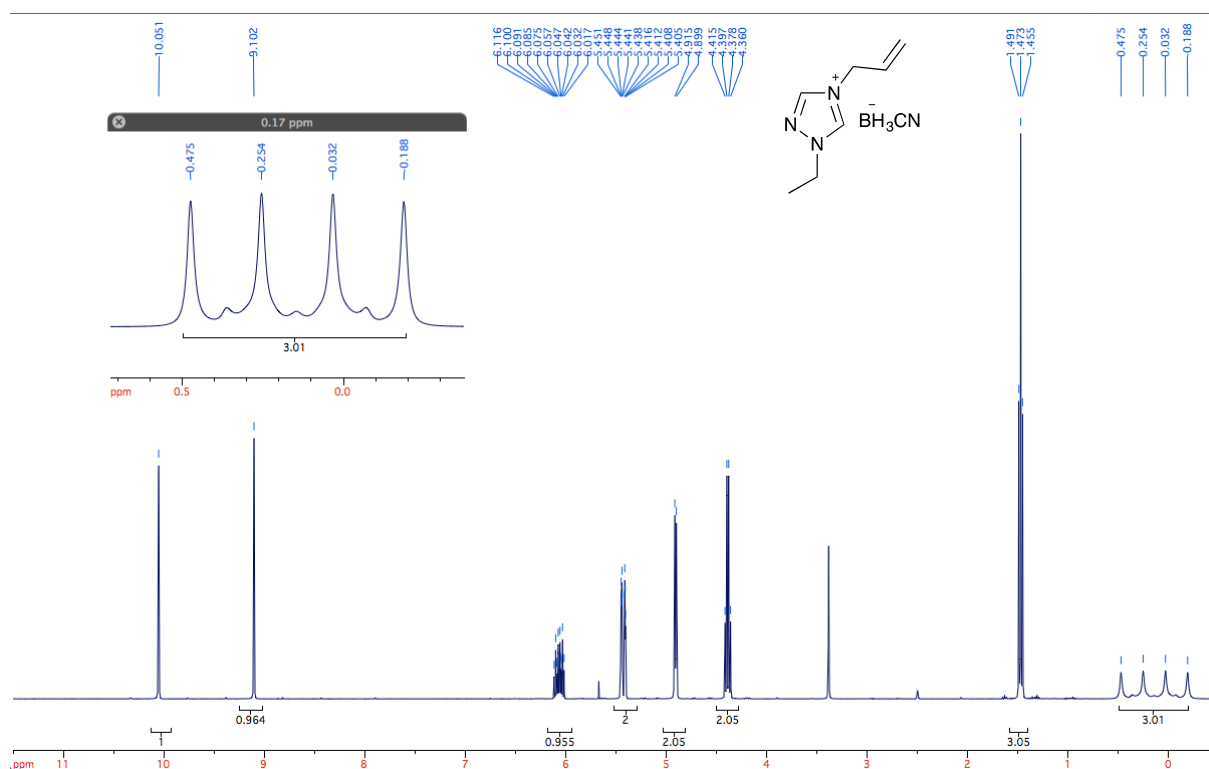

**Fig. S36.**  $^1\text{H}$  NMR of 4-Allyl-1-ethyl-1*H*-1,2,4-triazol-4-ium cyanotrihydroborate (**13**).

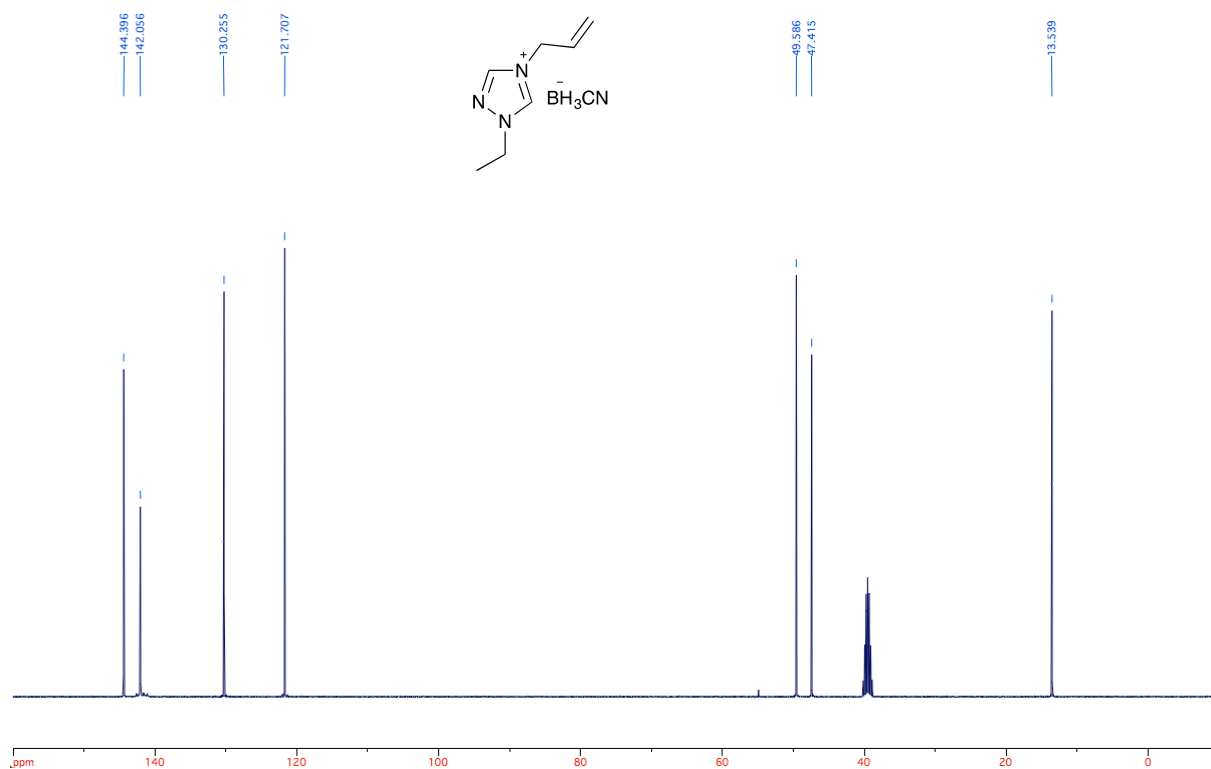

**Fig. S37.**  $^{13}\text{C}$  NMR of 4-Allyl-1-ethyl-1*H*-1,2,4-triazol-4-ium cyanotrihydroborate (**13**).

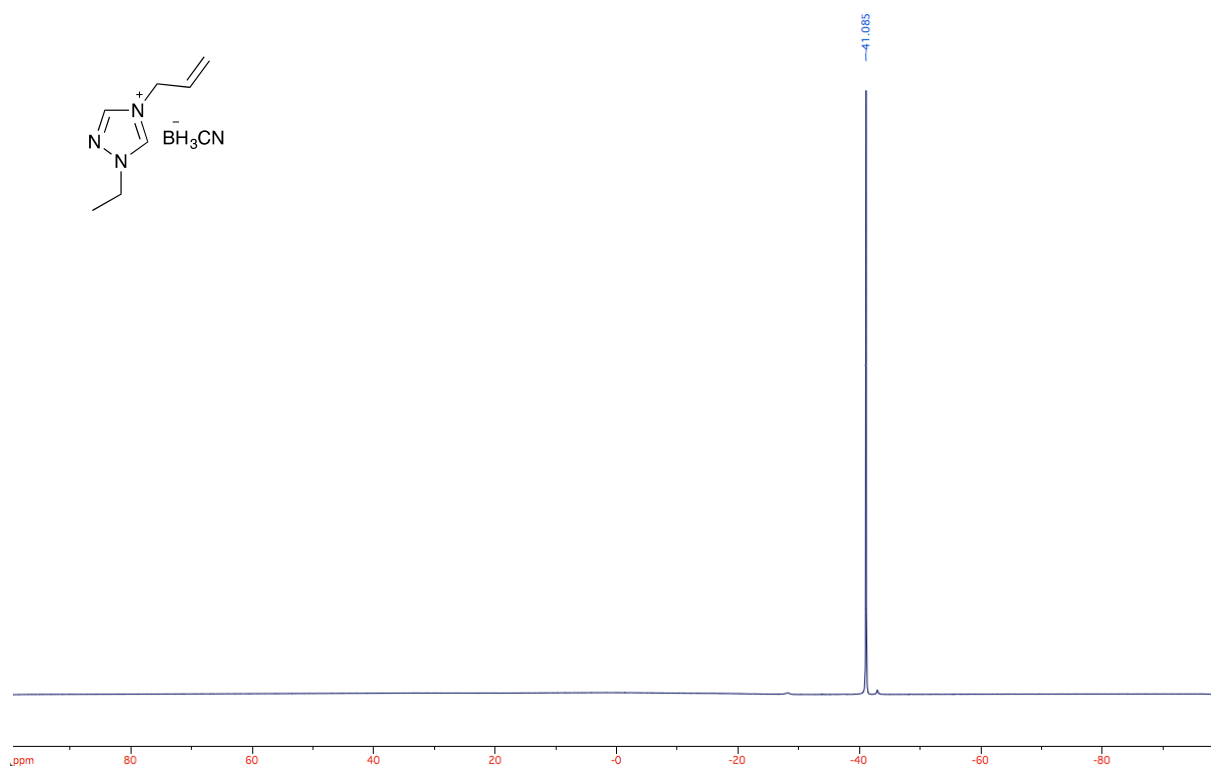

**Fig. S38.**  $^{11}\text{B}$  NMR of 4-Allyl-1-ethyl-1*H*-1,2,4-triazol-4-ium cyanotrihydroborate (**13**).

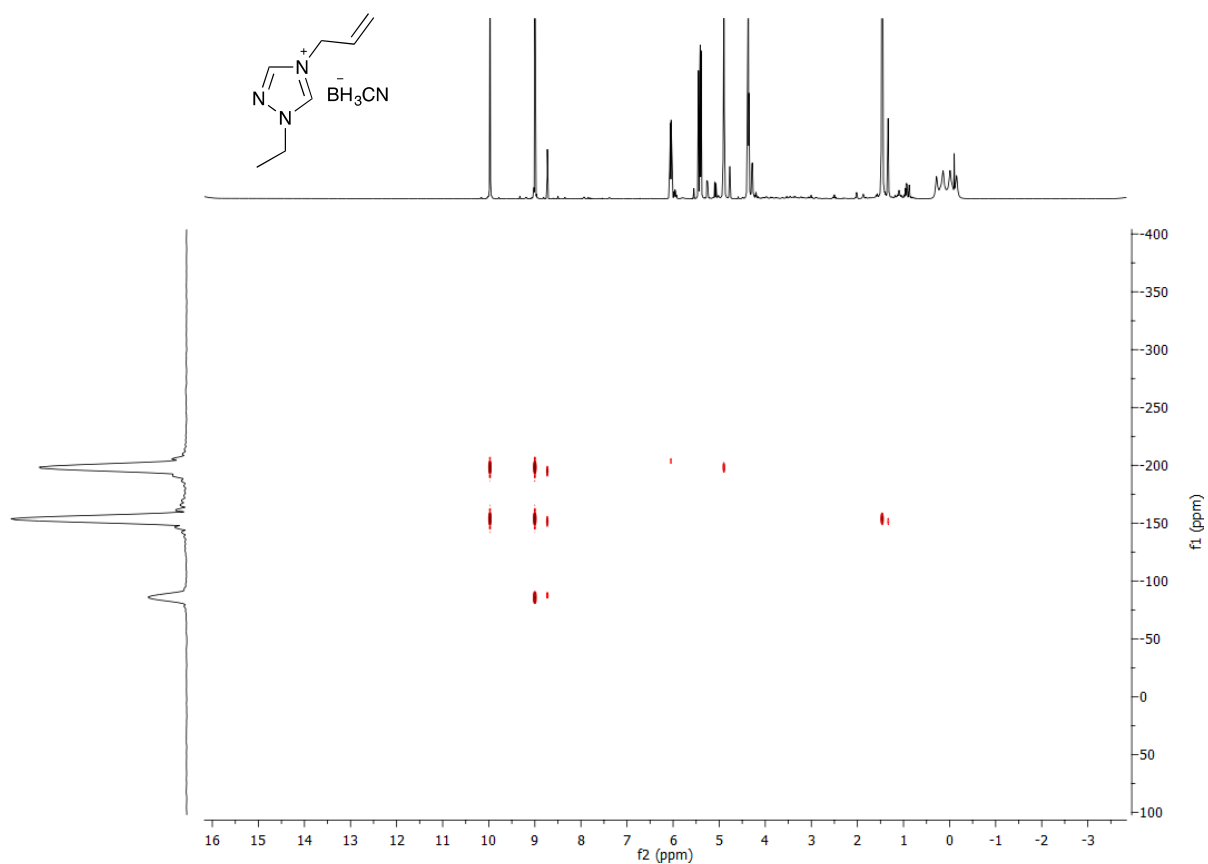

**Fig. S39.**  $^1\text{H}$ - $^{15}\text{N}$  HSQC of 4-Allyl-1-ethyl-1*H*-1,2,4-triazol-4-ium cyanotrihydroborate (13).

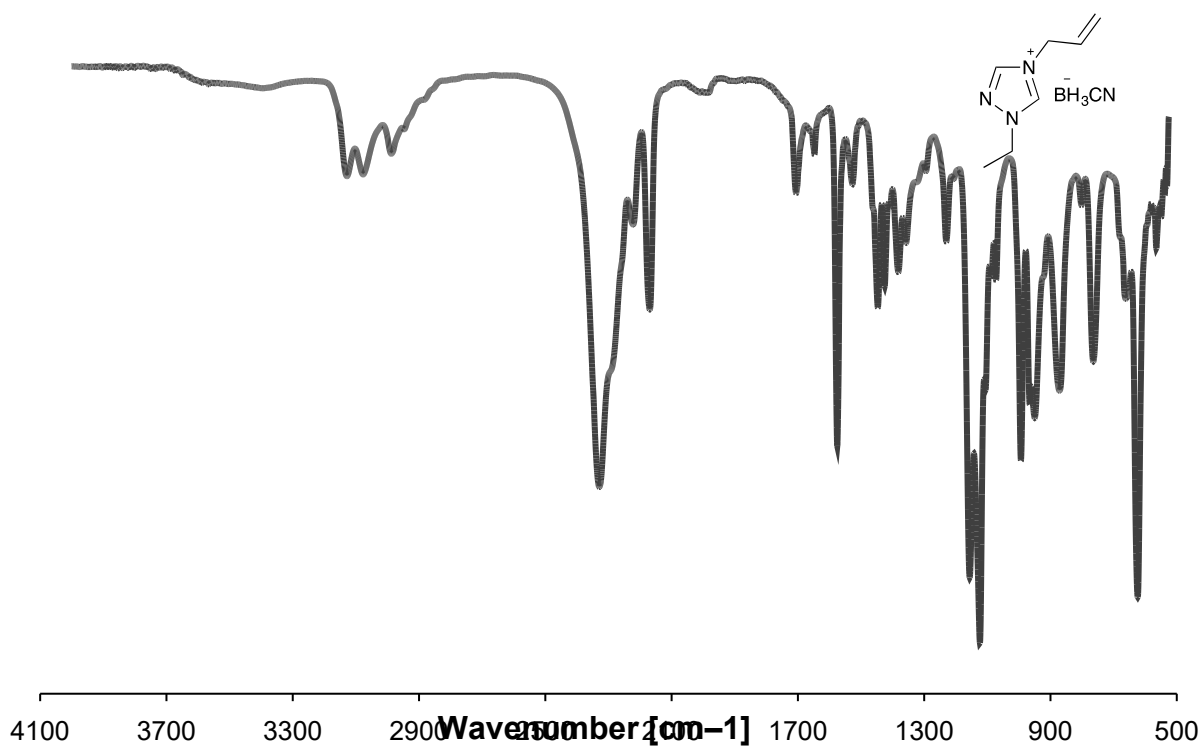

**Fig. S40.** IR spectrum of 4-Allyl-1-ethyl-1*H*-1,2,4-triazol-4-ium cyanotrihydroborate (13).

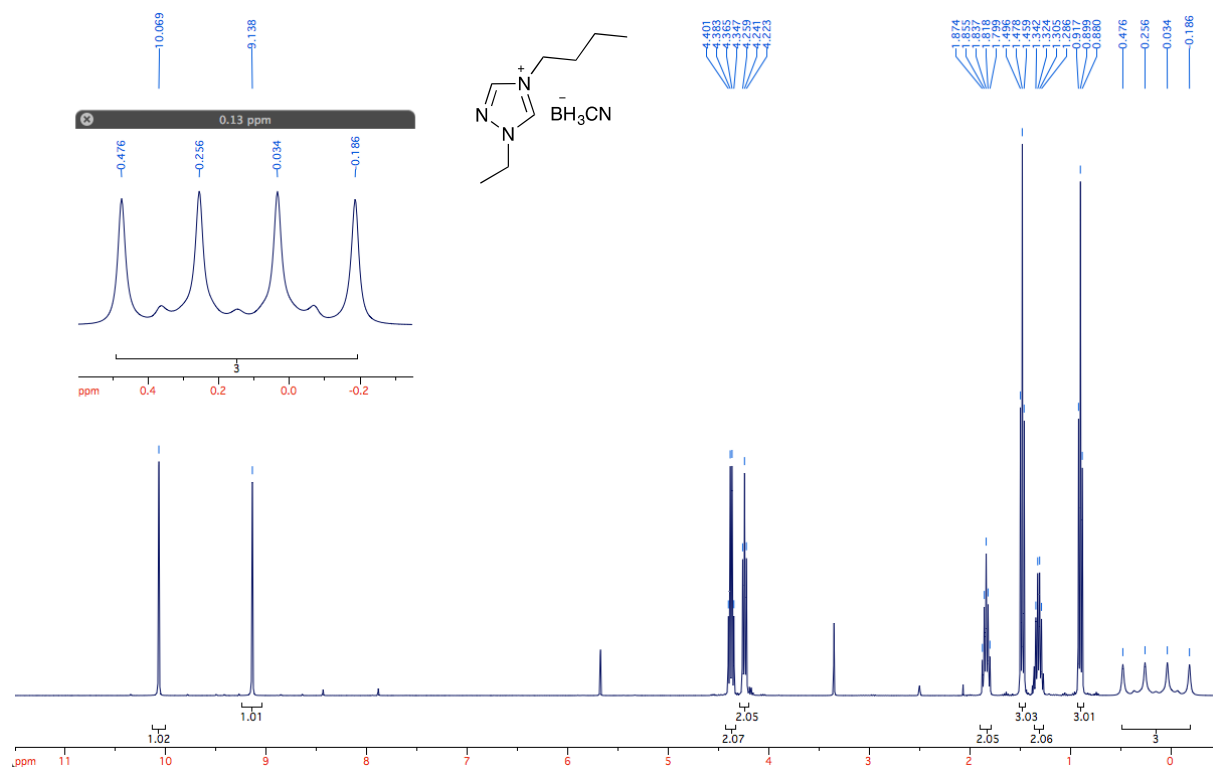

**Fig. S41.**  $^1\text{H}$  NMR of 4-Butyl-1-ethyl-1*H*-1,2,4-triazol-4-ium cyanotrihydroborate (**14**).

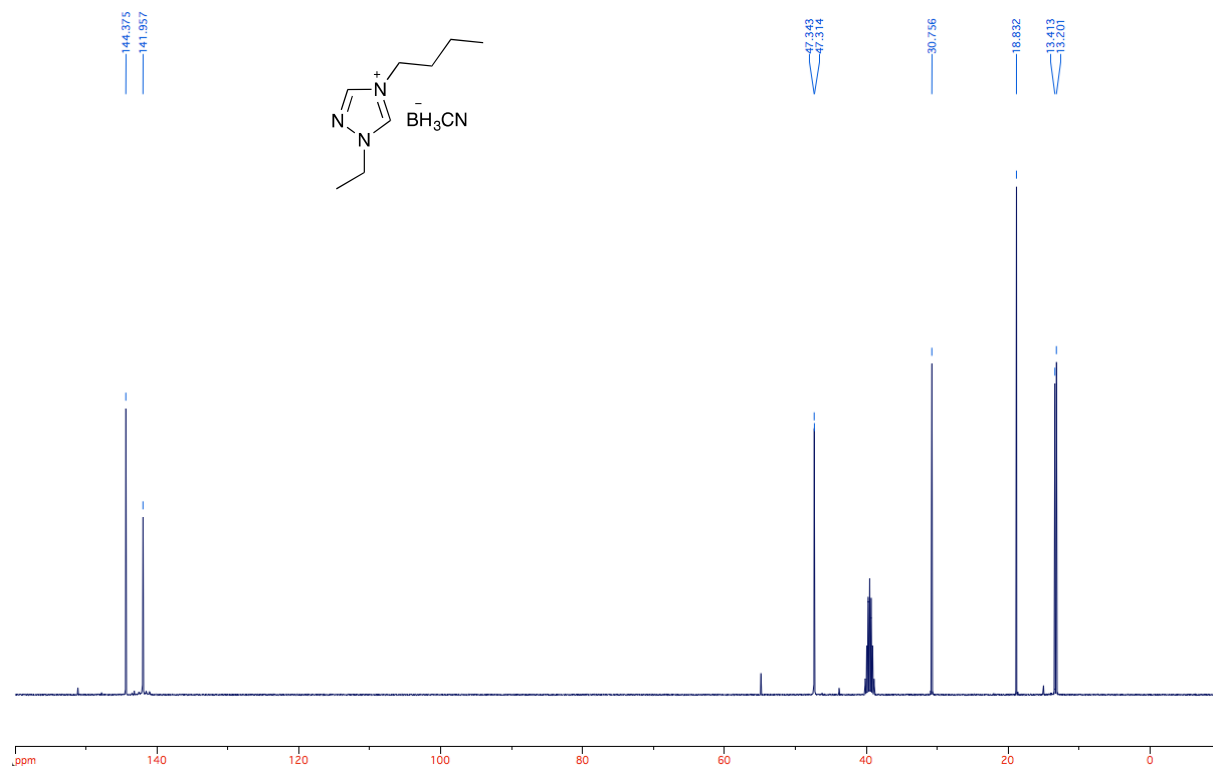

**Fig. S42.**  $^{13}\text{C}$  NMR of 4-Butyl-1-ethyl-1*H*-1,2,4-triazol-4-ium cyanotrihydroborate (**14**).

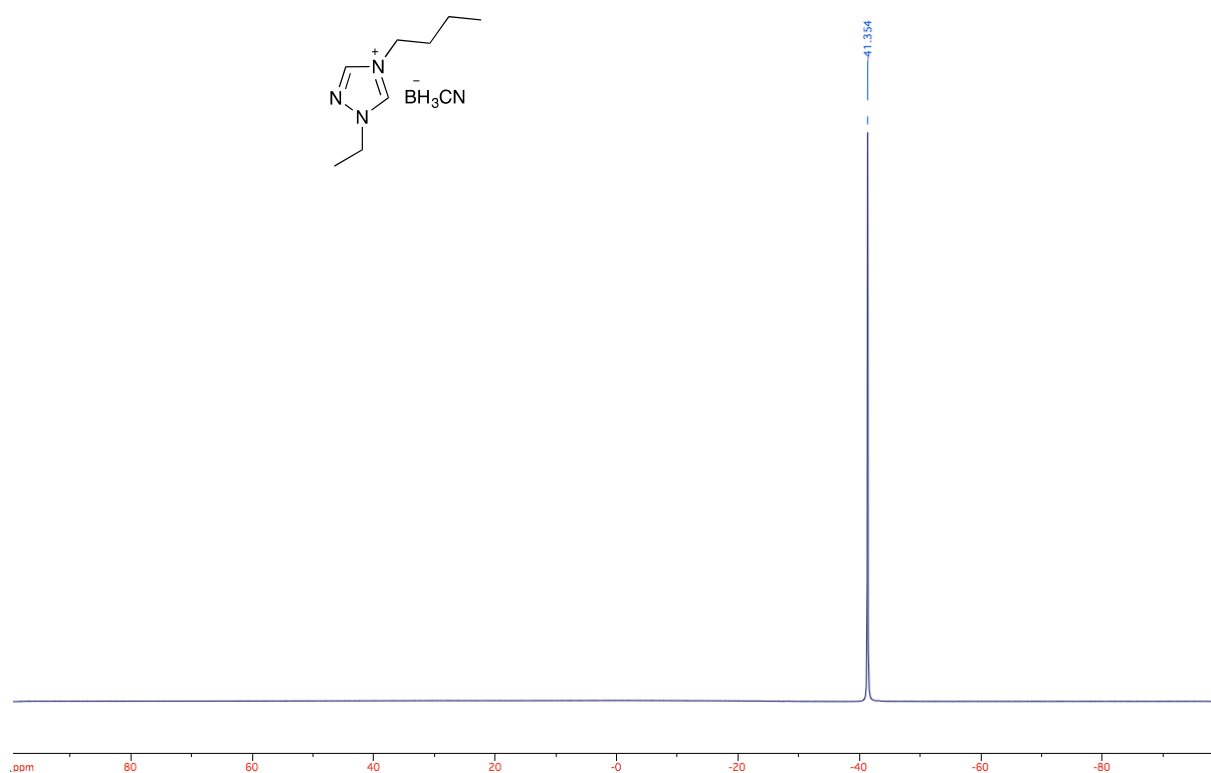

**Fig. S43.**  $^{11}\text{B}$  NMR of 4-Butyl-1-ethyl-1*H*-1,2,4-triazol-4-ium cyanotrihydroborate (**14**).

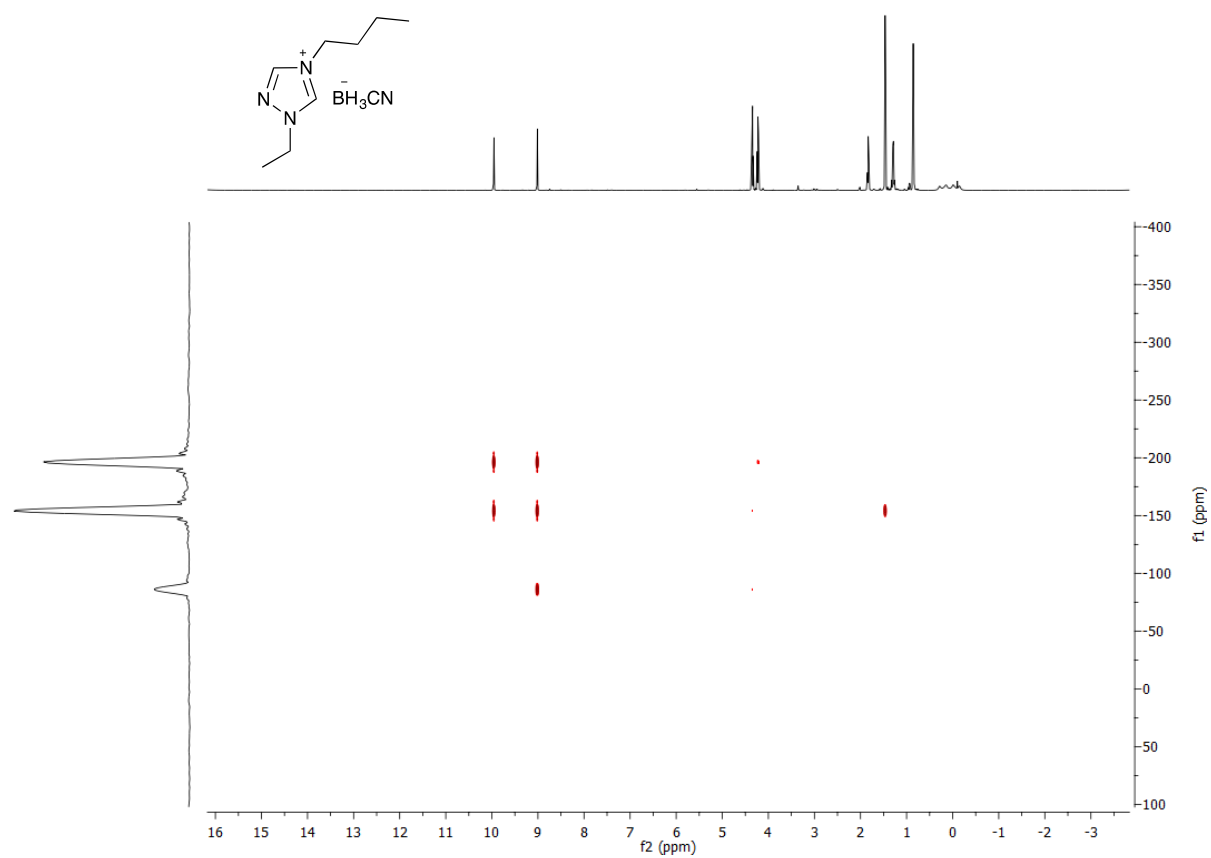

**Fig. S44.**  $^1\text{H}$ - $^{15}\text{N}$  HSQC of 4-Butyl-1-ethyl-1*H*-1,2,4-triazol-4-ium cyanotrihydroborate (**14**).

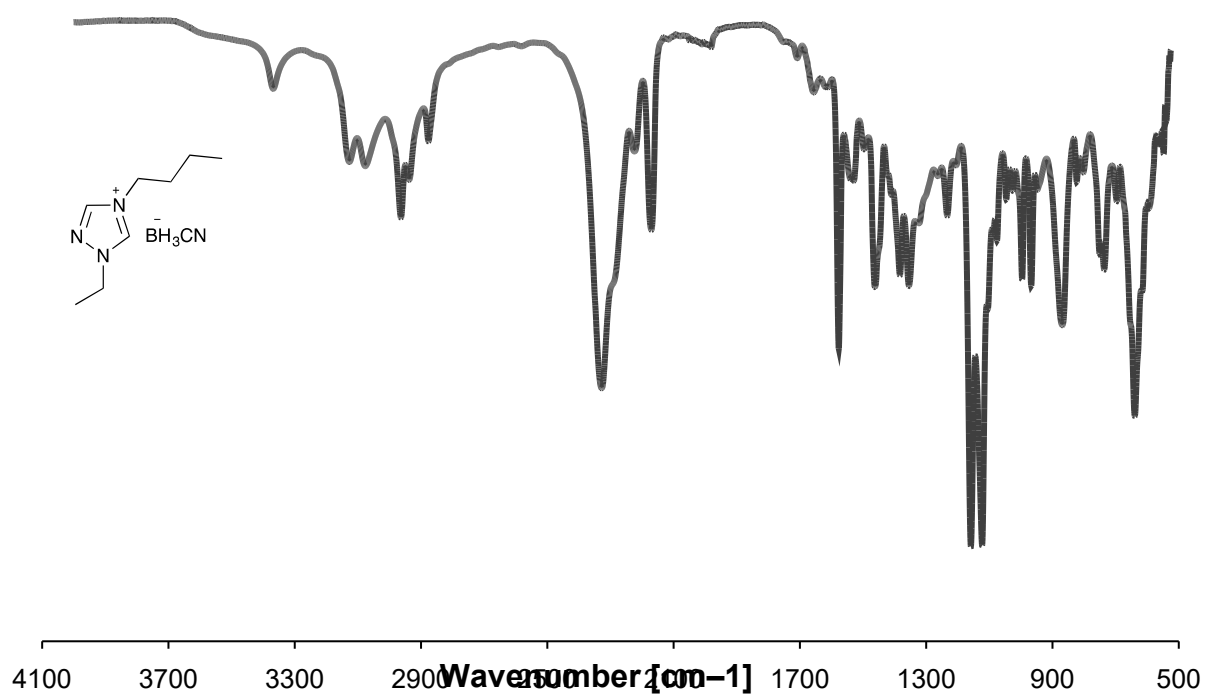

**Fig. S45.** IR spectrum of 4-Butyl-1-ethyl-1*H*-1,2,4-triazol-4-ium cyanotrihydroborate (**14**).

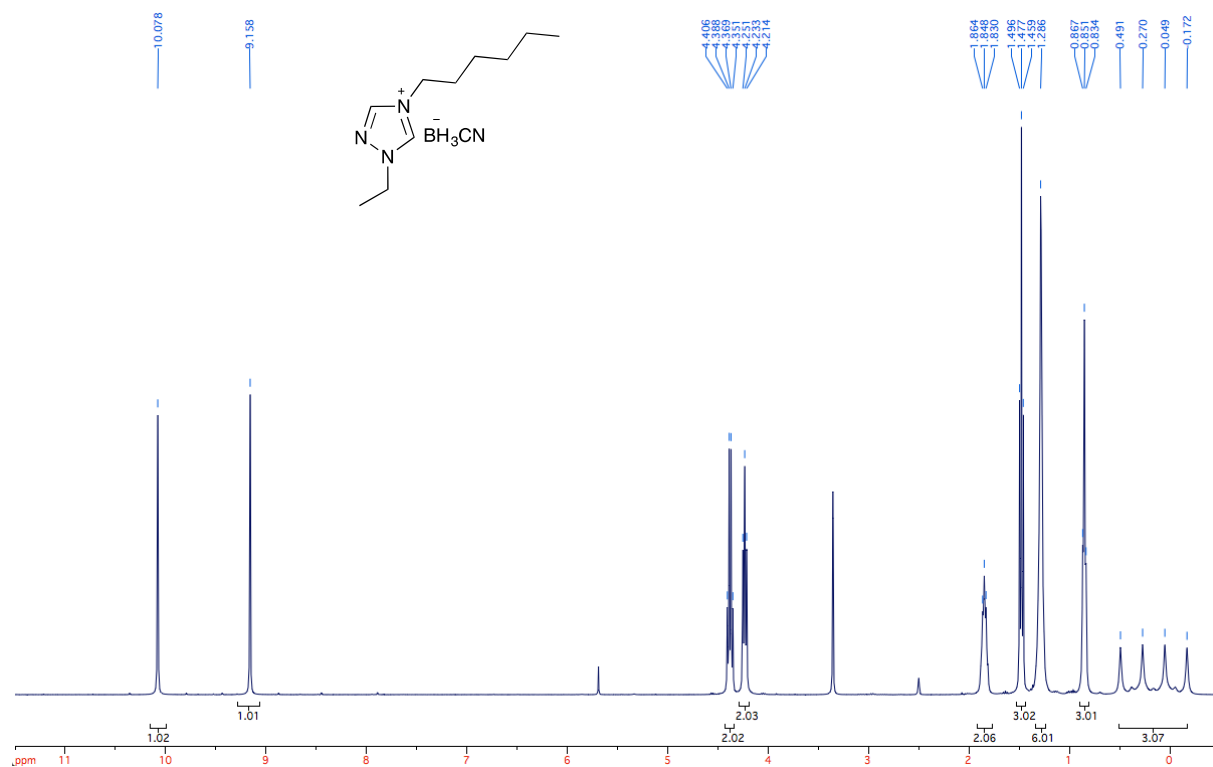

**Fig. S46.** <sup>1</sup>H NMR of 1-Ethyl-4-hexyl-1*H*-1,2,4-triazol-4-ium cyanotrihydroborate (**15**).

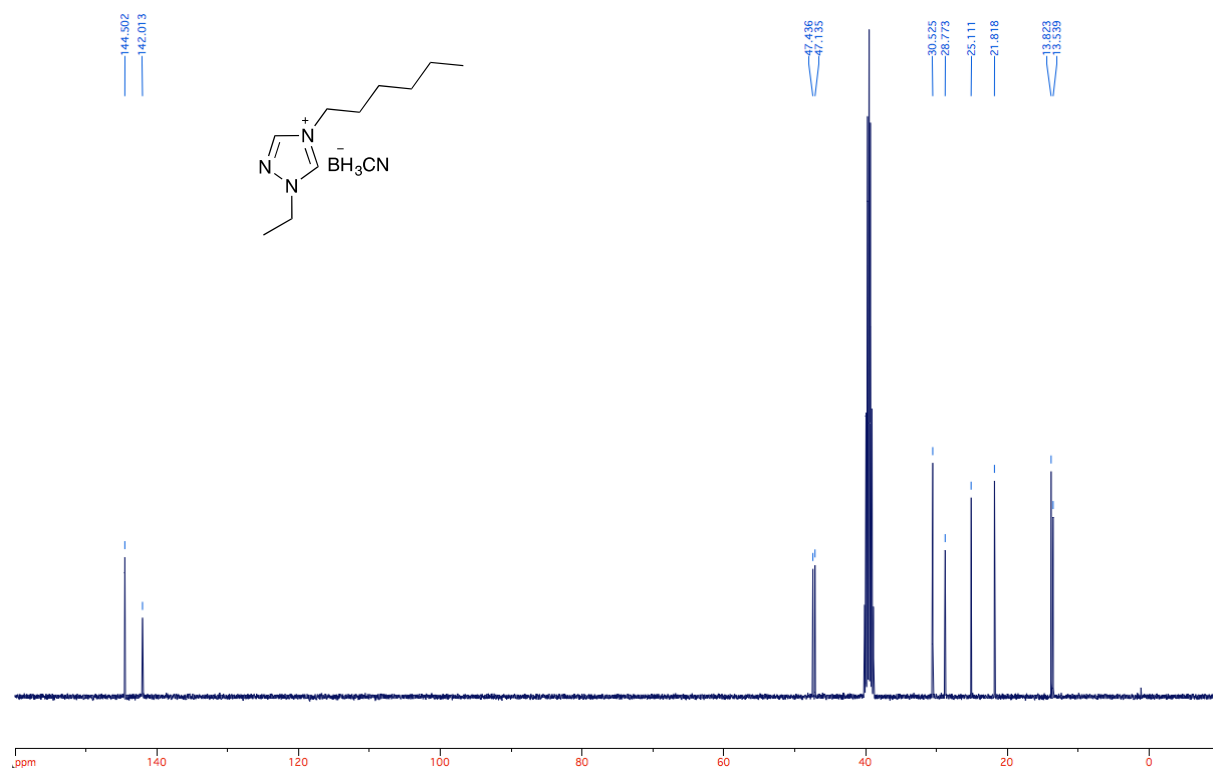

**Fig. S47.**  $^{13}\text{C}$  NMR of 1-Ethyl-4-hexyl-1H-1,2,4-triazol-4-ium cyanotrihydroborate (**15**).

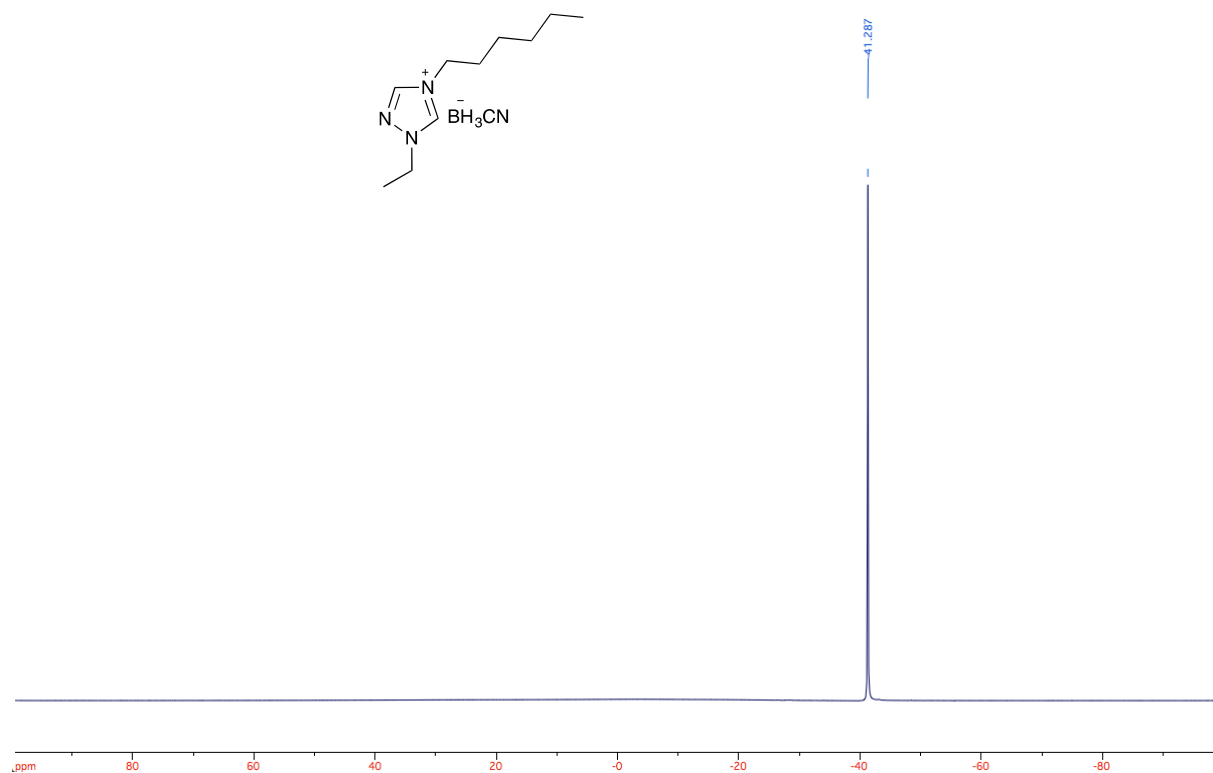

**Fig. S48.**  $^{11}\text{B}$  NMR of 1-Ethyl-4-hexyl-1H-1,2,4-triazol-4-ium cyanotrihydroborate (**15**).



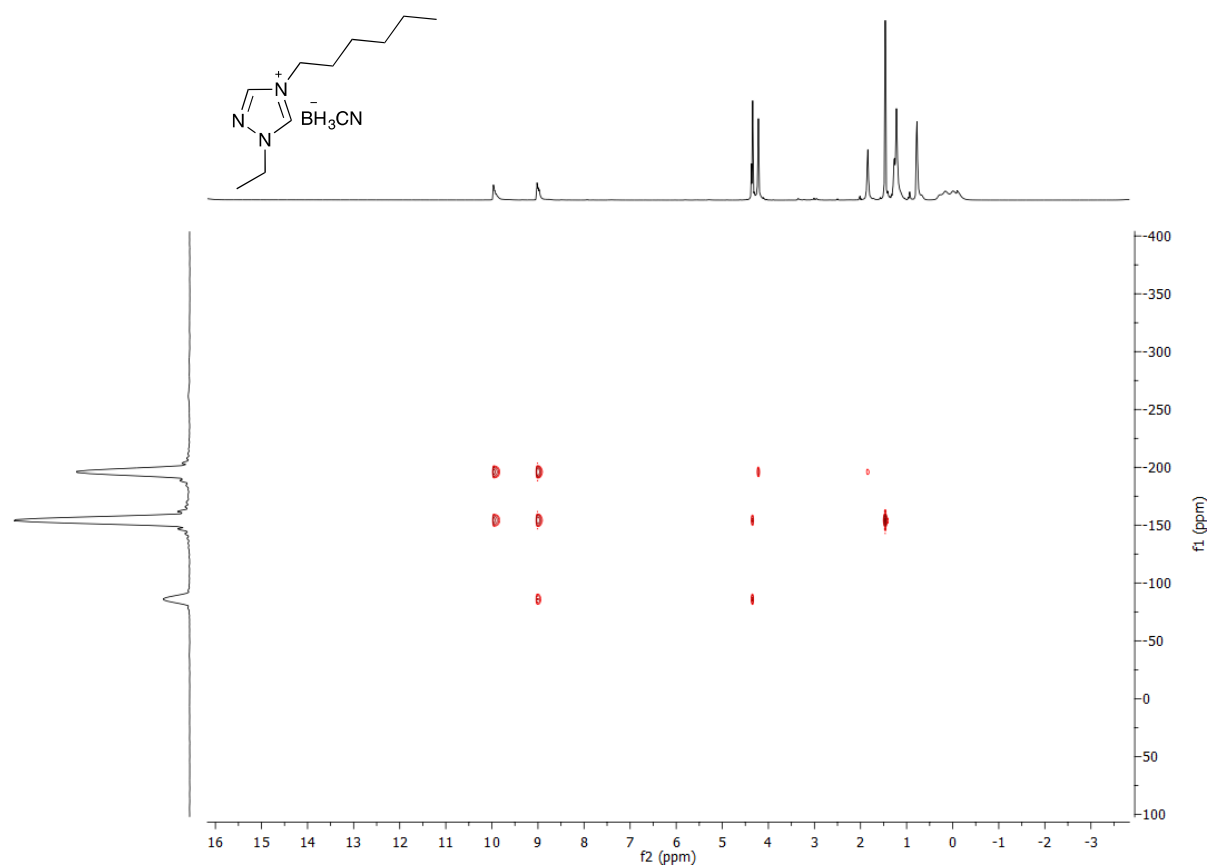

**Fig. S49.**  $^1\text{H}$ - $^{15}\text{N}$  HSQC of 1-Ethyl-4-hexyl-1*H*-1,2,4-triazol-4-ium cyanotrihydroborate (**15**).

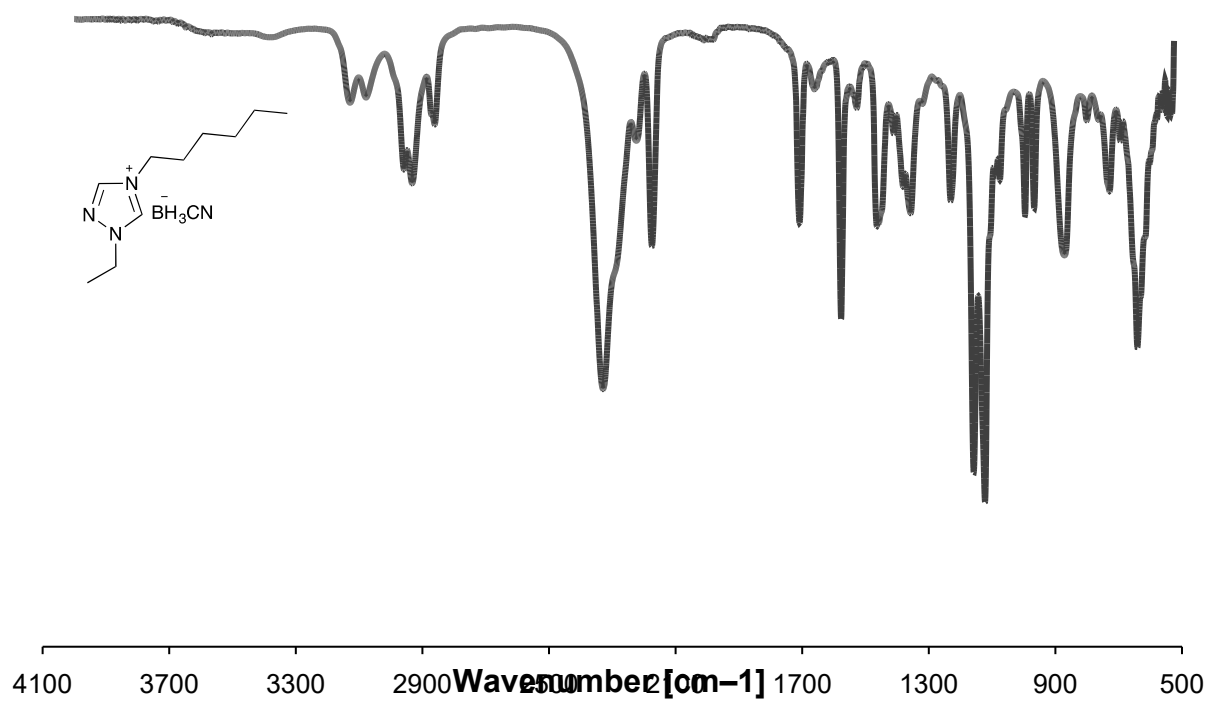

**Fig. S50.** IR spectrum of 1-Ethyl-4-hexyl-1*H*-1,2,4-triazol-4-ium cyanotrihydroborate (**15**).

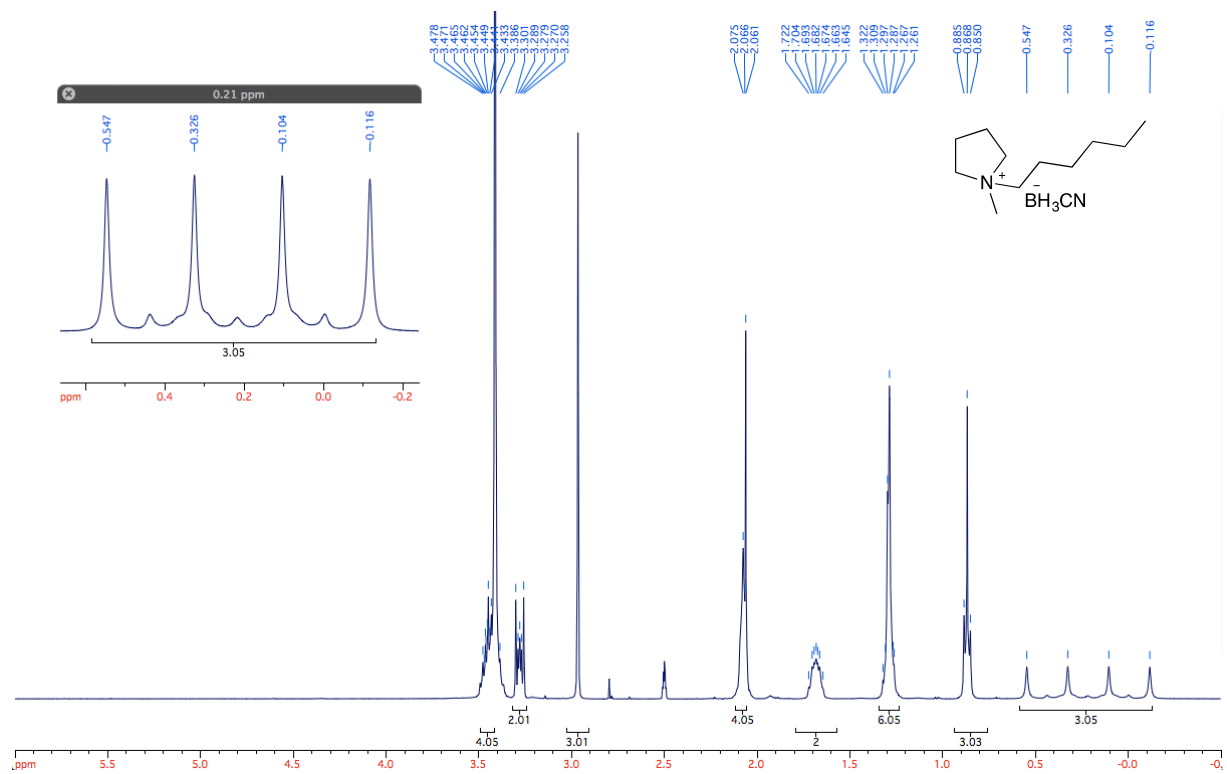

**Fig. S51.**  $^1\text{H}$  NMR of 1-Hexyl-1-methylpyrrolidin-1-ium cyanotrihydroborate (**17**).

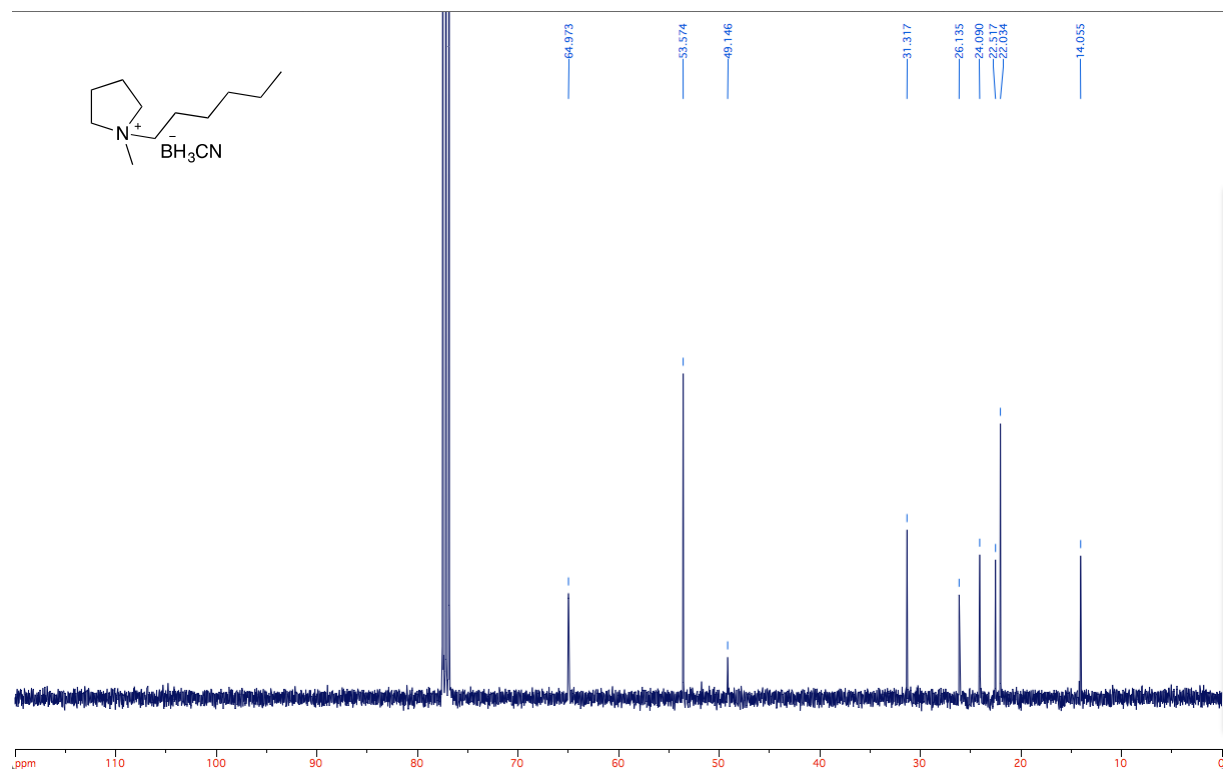

**Fig. S52.**  $^{13}\text{C}$  NMR of 1-Hexyl-1-methylpyrrolidin-1-ium cyanotrihydroborate (**17**).

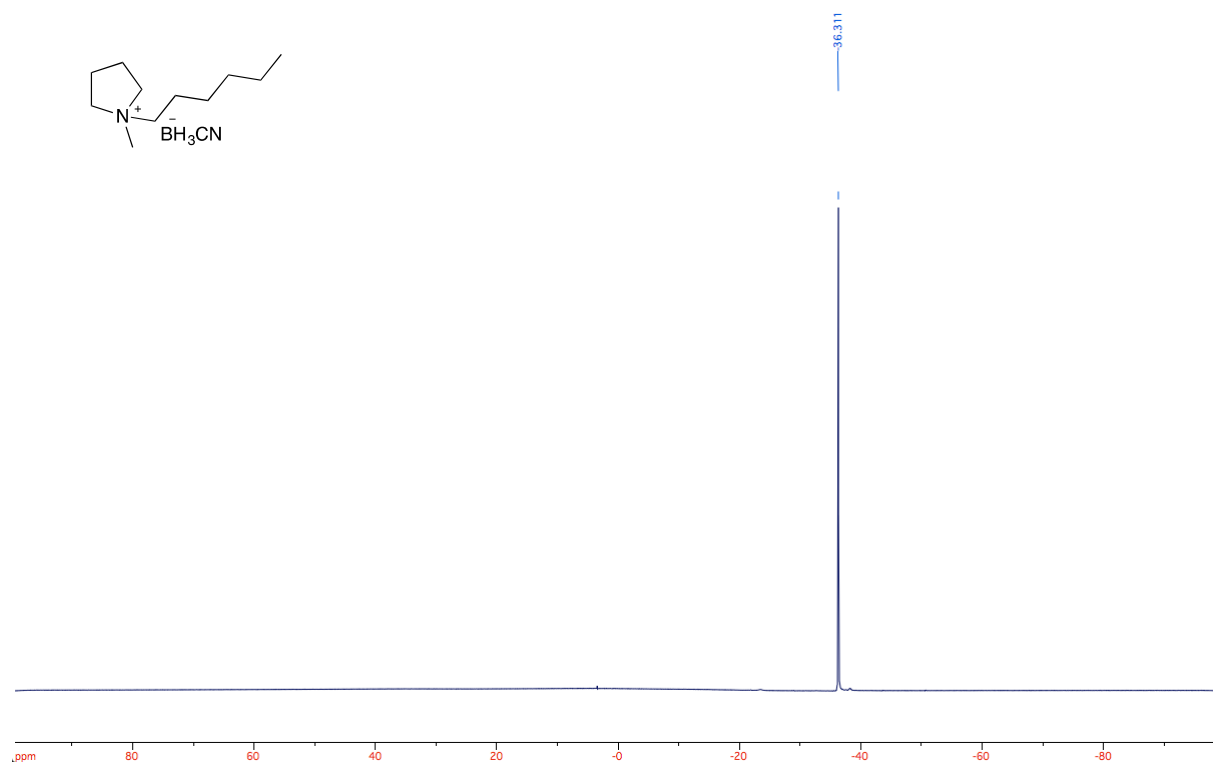

**Fig. S53.**  $^{11}\text{B}$  NMR of 1-Hexyl-1-methylpyrrolidin-1-ium cyanotrihydroborate (**17**).

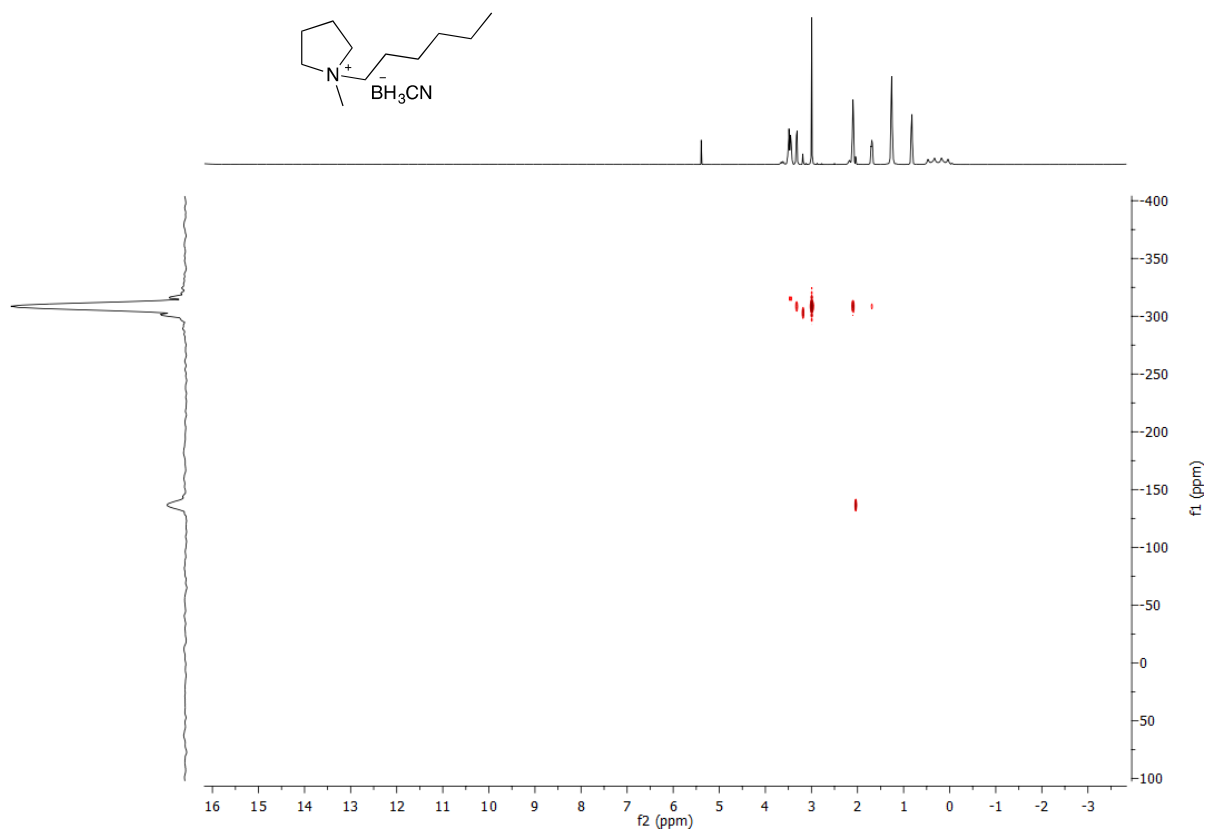

**Fig. S54.**  $^1\text{H}$ - $^{15}\text{N}$  HSQC of 1-Hexyl-1-methylpyrrolidin-1-ium cyanotrihydroborate (**17**).

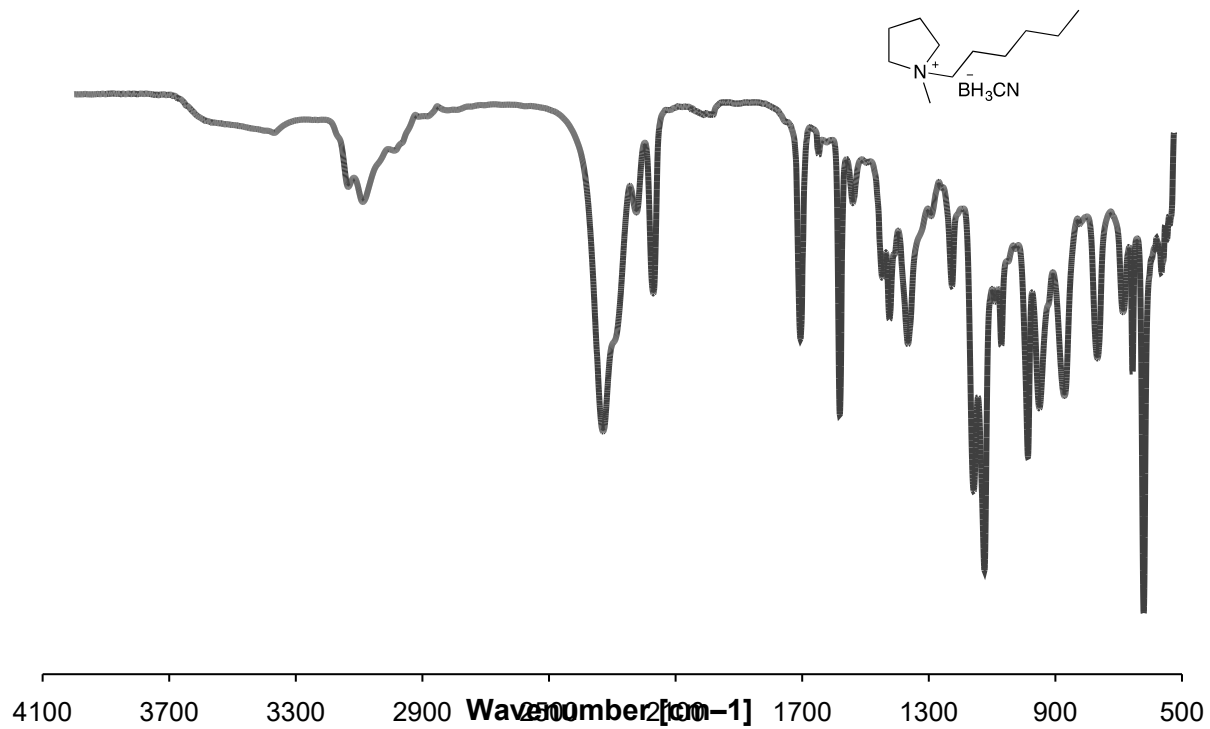

**Fig. S55.** IR spectrum of 1-Hexyl-1-methylpyrrolidin-1-ium cyanotrihydroborate (**17**).

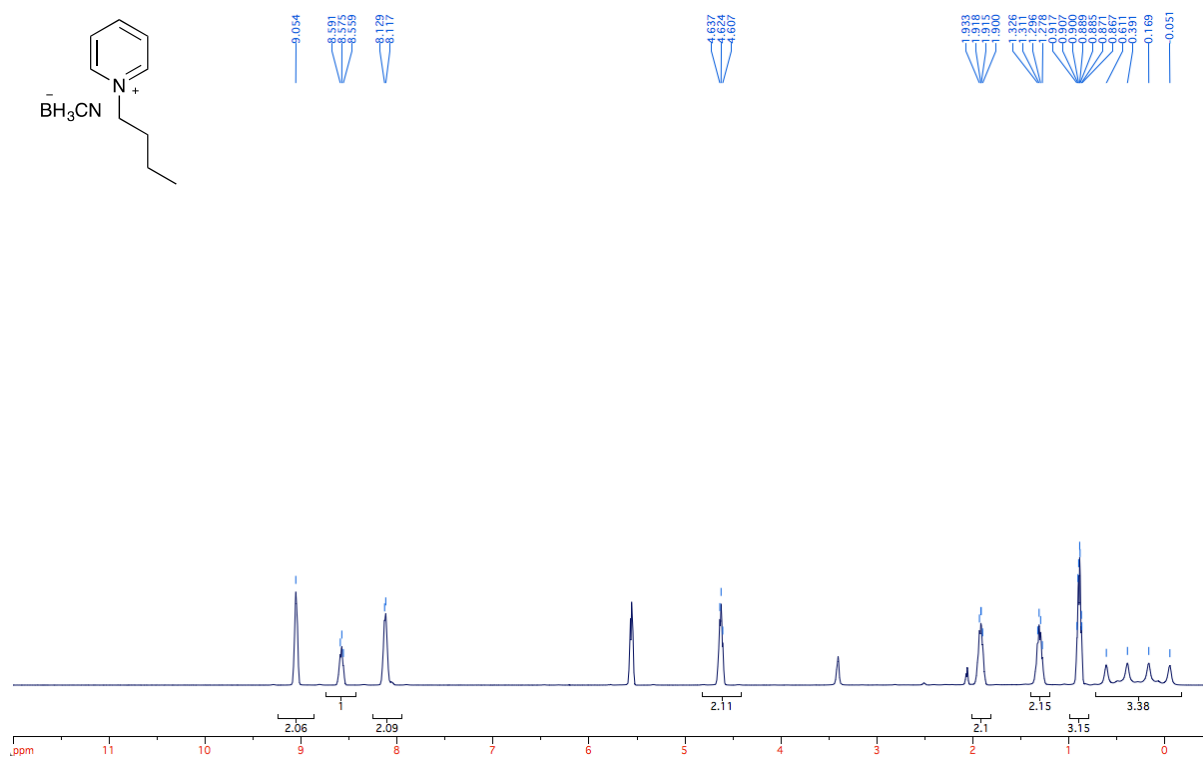

**Fig. S56.** <sup>1</sup>H NMR of 1-Butylpyridin-1-ium cyanotrihydroborate (**19**).

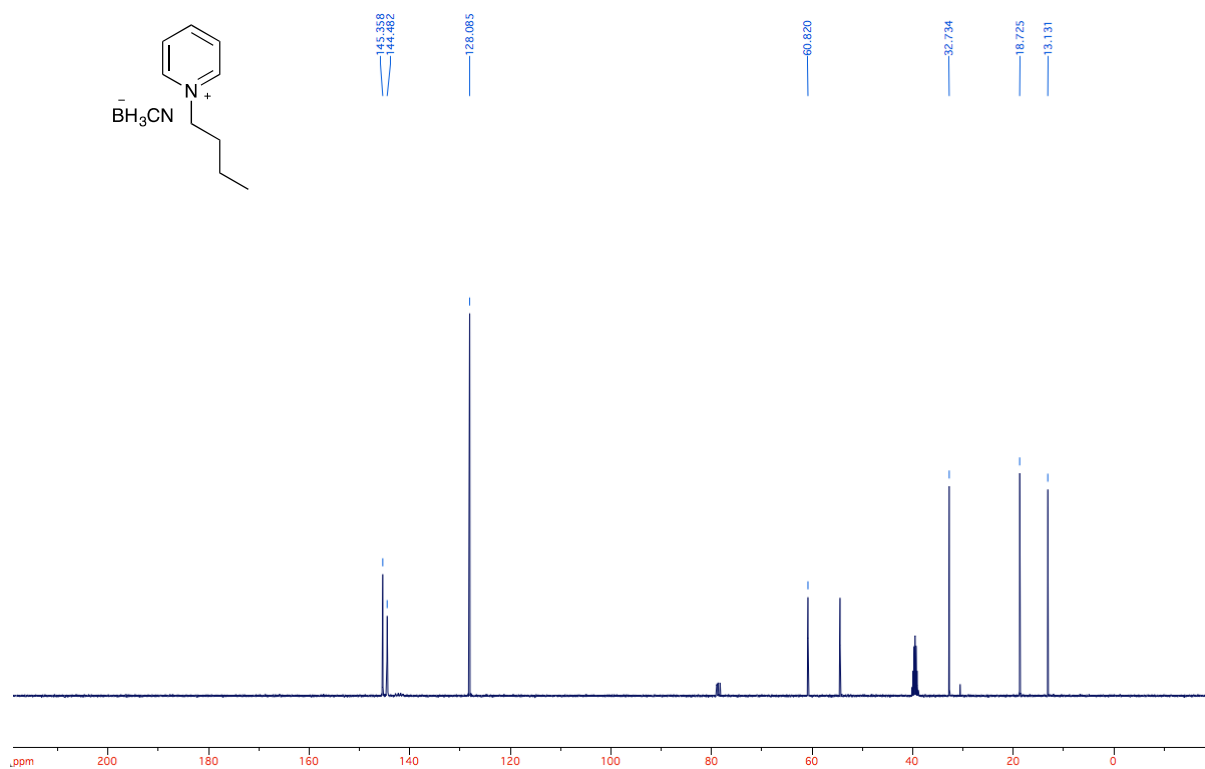

Fig. S57.  $^{13}\text{C}$  NMR of 1-Butylpyridin-1-ium cyanotrihydroborate (19).

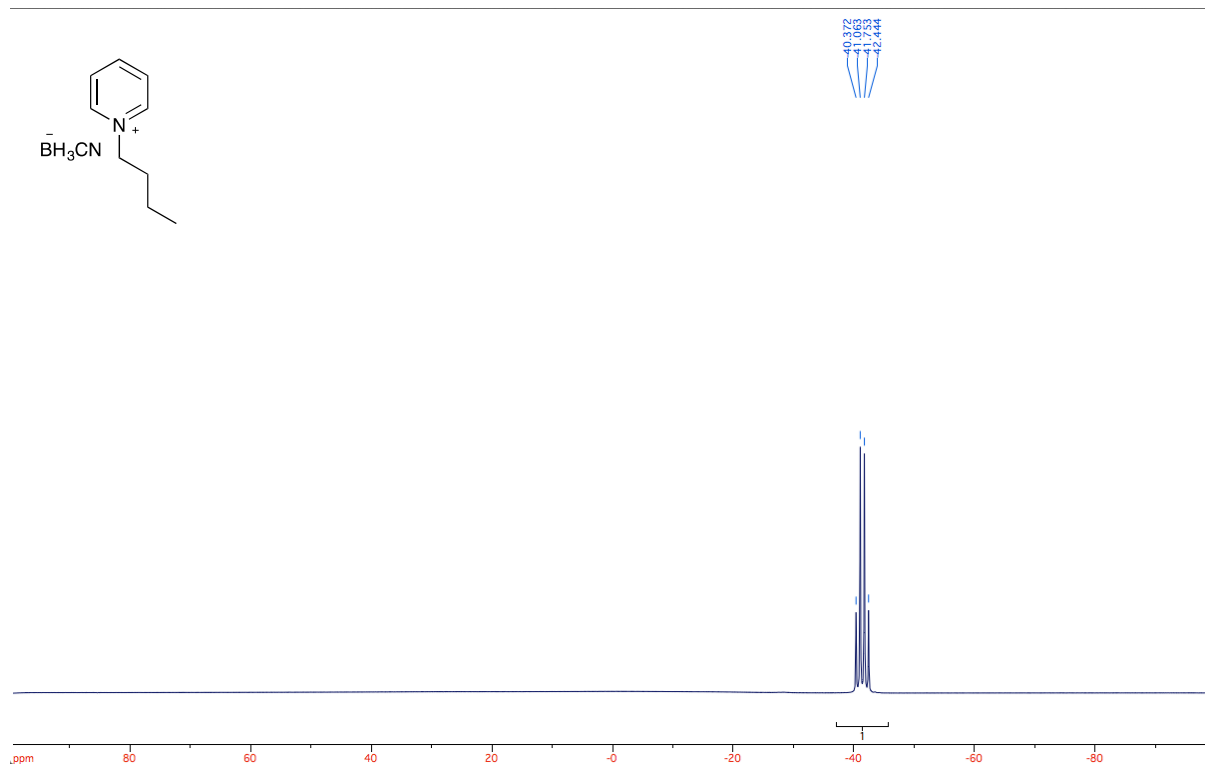

Fig. S58.  $^{11}\text{B}$  NMR of 1-Butylpyridin-1-ium cyanotrihydroborate (19).

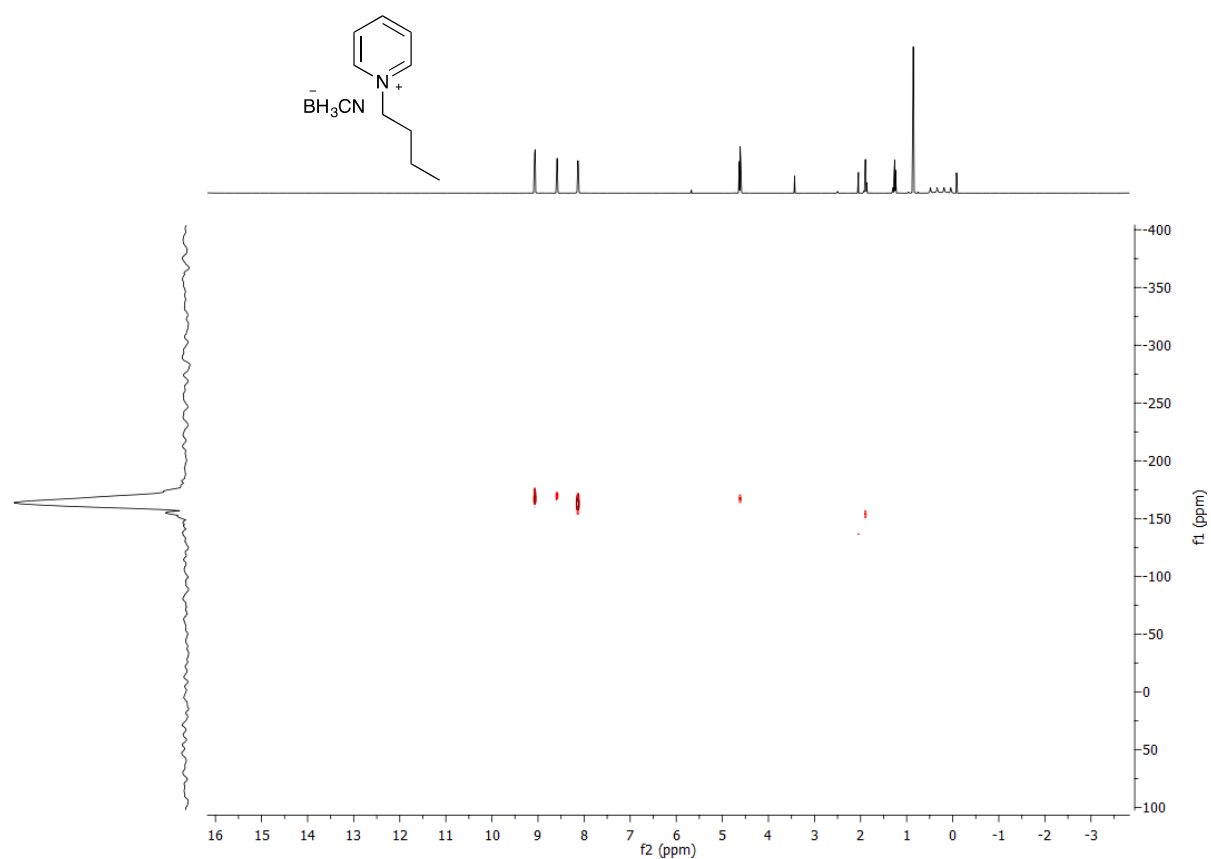

**Fig. S59.**  $^1\text{H}$ - $^{15}\text{N}$  HSQC of 1-Butylpyridin-1-ium cyanotrihydroborate (**19**).

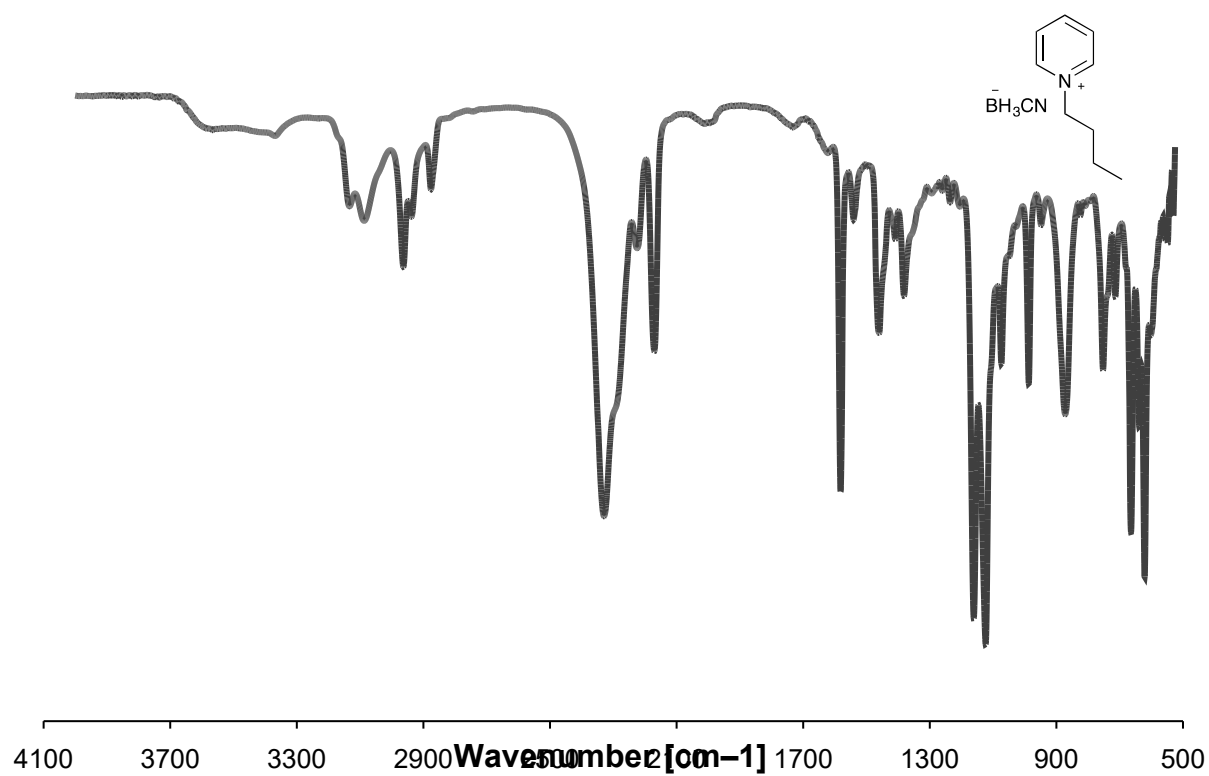

**Fig. S60.** IR spectrum of 1-Butylpyridin-1-ium cyanotrihydroborate (**19**).

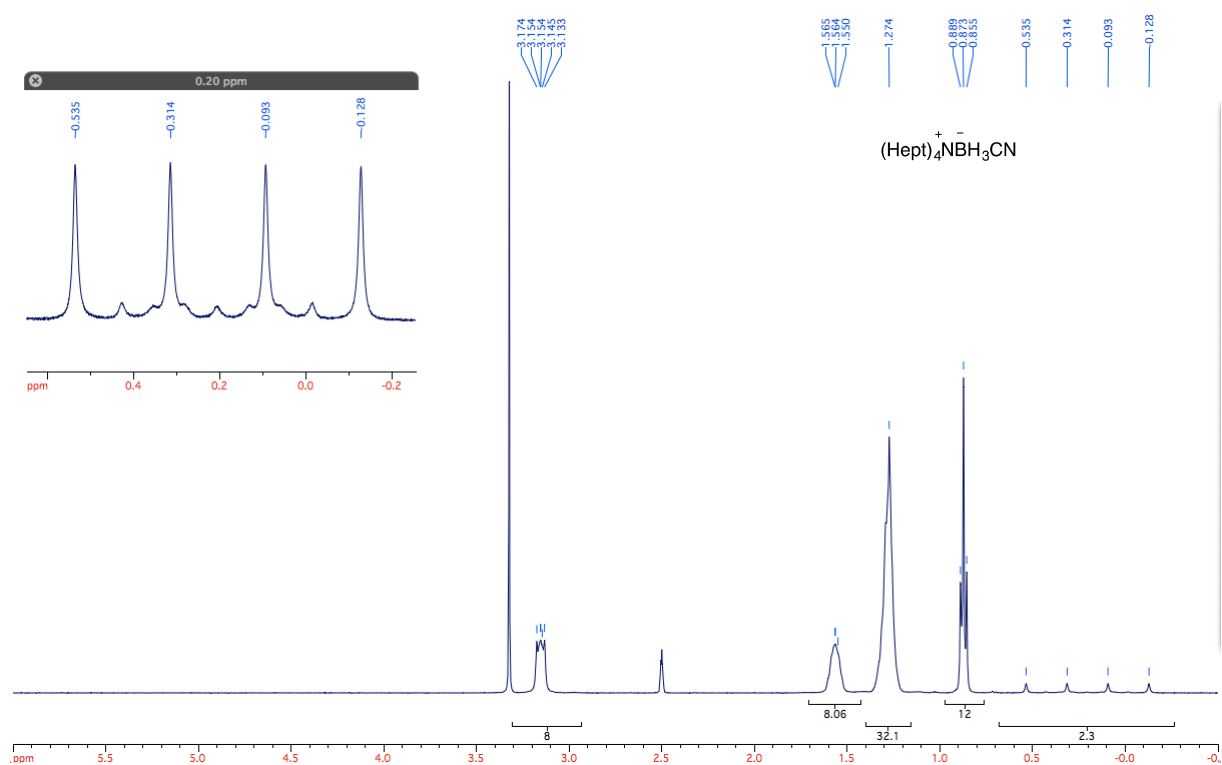

Fig. S61.  $^1\text{H}$  NMR Tetraheptylammonium cyanotrihydroborate (**20**).

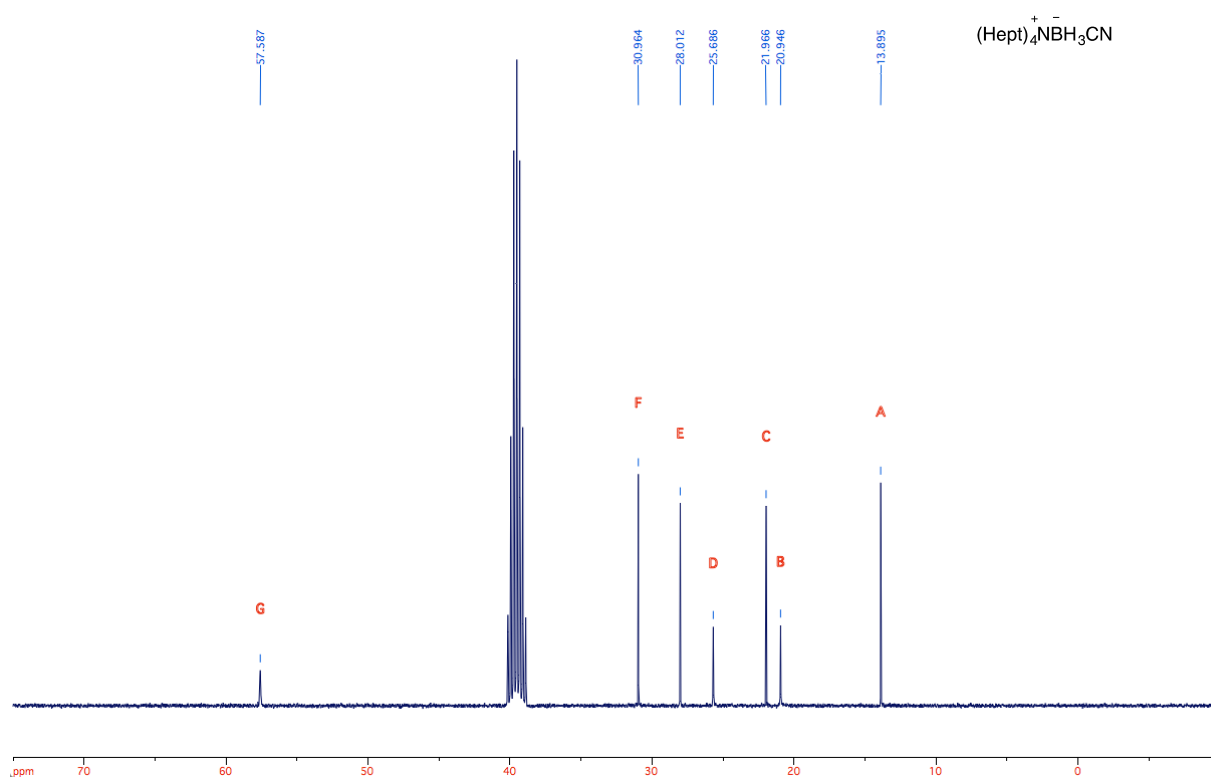

Fig. S62.  $^{13}\text{C}$  NMR of Tetraheptylammonium cyanotrihydroborate (**20**).

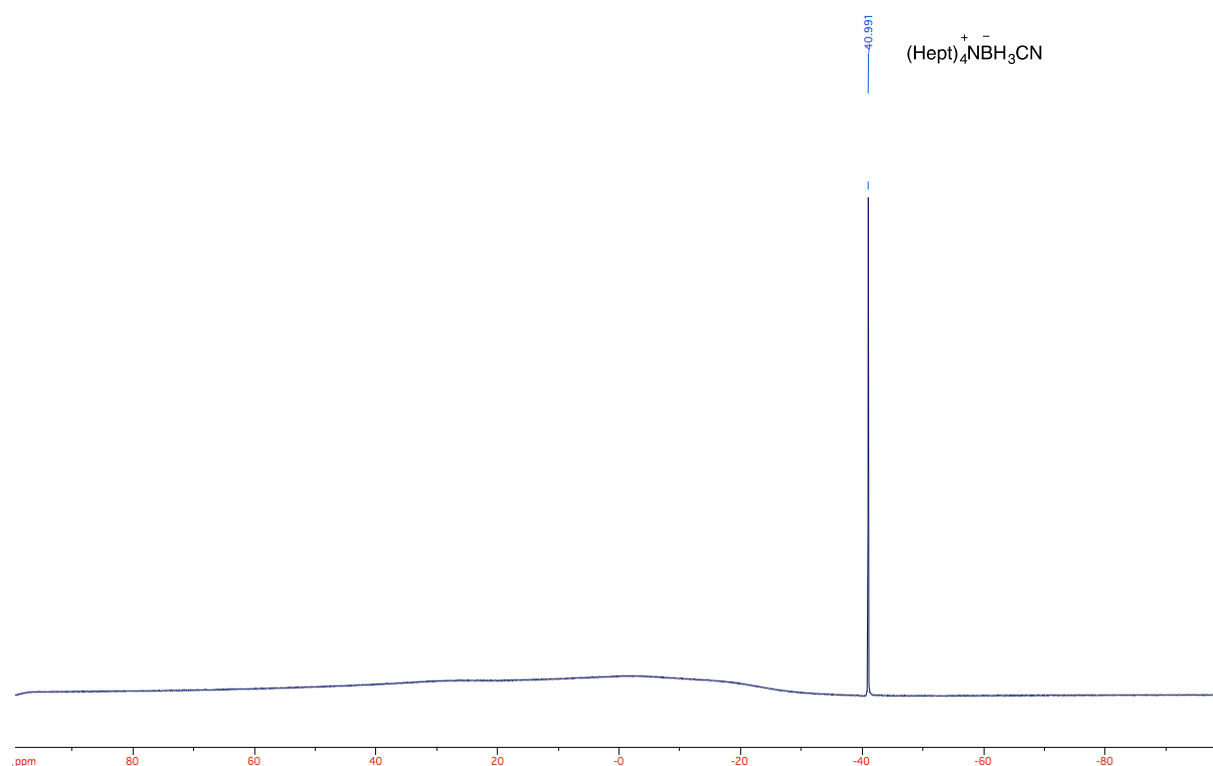

**Fig. S63.** <sup>11</sup>B NMR of Tetraheptylammonium cyanotrihydroborate (**20**).

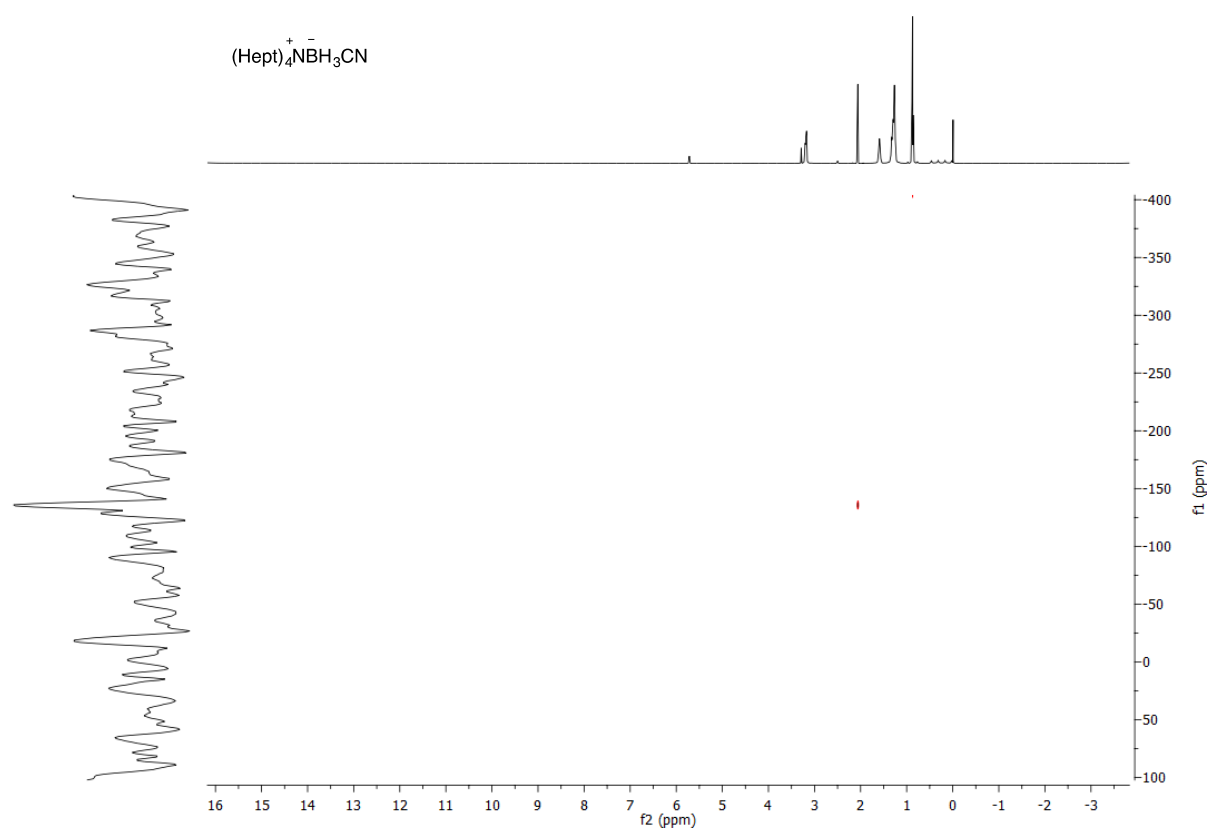

**Fig. S64.** <sup>1</sup>H-<sup>15</sup>N HSQC of Tetraheptylammonium cyanotrihydroborate (**20**).



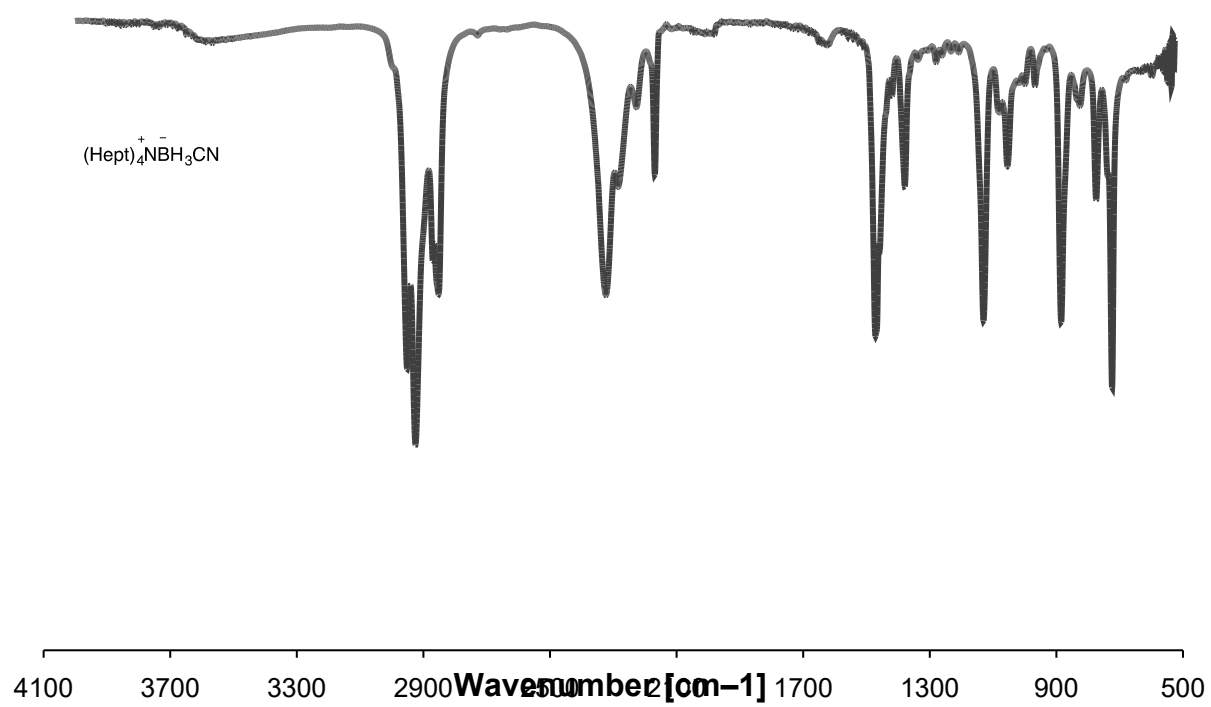

**Fig. S65.** IR spectrum of Tetraheptylammonium cyanotrihydroborate (**20**).

## Computational Methods

All calculations on structural properties of these molecules were performed at the levels of B3LYP/6-311+G(3df,2p) using G03 quantum chemistry package.<sup>1</sup> About the accuracy for the prediction of various properties of energetic molecules, there is a review paper available in the literature.<sup>2</sup> Since we also focus on energies of isodesmic reactions for heats of formation in these molecules, the B3LYP/6-311+G(3df,2p) calculation has been used as our results on heats of formation. Harmonic vibrational frequencies were also calculated at the same theory level as that are used to fully optimize molecular structures, which enable us to confirm the real minima. For heats of combustion, the general reaction equation is given by:

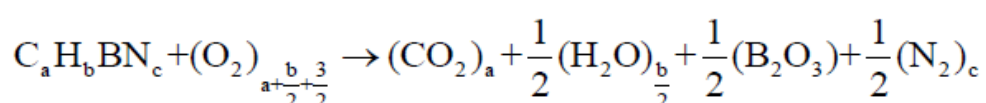

The experimental heats of formation for CO<sub>2</sub>, H<sub>2</sub>O and B<sub>2</sub>O<sub>3</sub> in gas phases are -393.51, -241.826 and -835.96 kJ/mol, respectively, which are given from NIST-JANAF thermochemical tables.<sup>3</sup> The Fig. S66 shows the calculated IR spectrum of **6** while the Fig. S67 gives the optimized structures of IL studied herein.

**Table S4.** Experimental heats of formation for reference molecules.<sup>3</sup>

| Name              | Formula                                      | $\Delta H_{gas}^f$ (kJ/mol) |
|-------------------|----------------------------------------------|-----------------------------|
| 1H-1,2,4-Triazole | C <sub>2</sub> H <sub>3</sub> N <sub>3</sub> | 192.7                       |
| Ammonia           | NH <sub>3</sub>                              | 106.69                      |
| Methane           | CH <sub>4</sub>                              | -74.87                      |
| Propene           | C <sub>3</sub> H <sub>6</sub>                | 20.41                       |
| Butane            | C <sub>4</sub> H <sub>10</sub>               | -125.6                      |
| <i>n</i> -Hexane  | C <sub>6</sub> H <sub>14</sub>               | -167.1                      |
| Ethane            | C <sub>2</sub> H <sub>6</sub>                | -84.0                       |
| Heptane           | C <sub>7</sub> H <sub>14</sub>               | -187.8                      |
| Pyridine          | C <sub>5</sub> H <sub>5</sub> N              | 140.2                       |
| Pyrrolidine       | C <sub>4</sub> H <sub>9</sub> N              | -3.4                        |
| Borane            | BH <sub>3</sub>                              | 106.69                      |
| Hydrogen cyanide  | CHN                                          | 135.14                      |

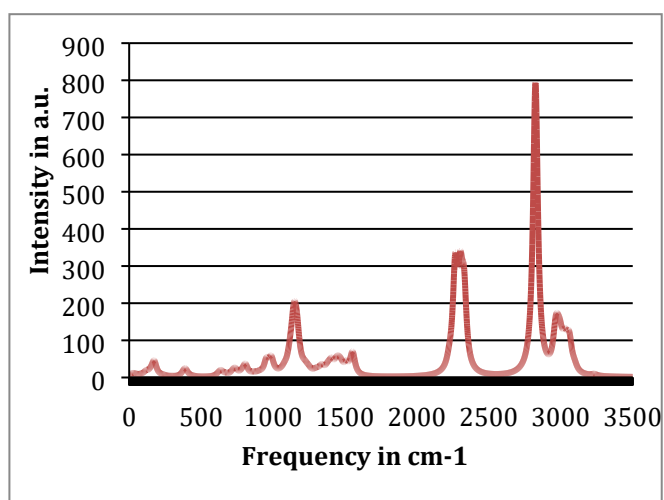

**Fig. S66.** The calculated IR spectrum of **15** in which there is no negative frequency, showing the real minimum with respect to the total energy.

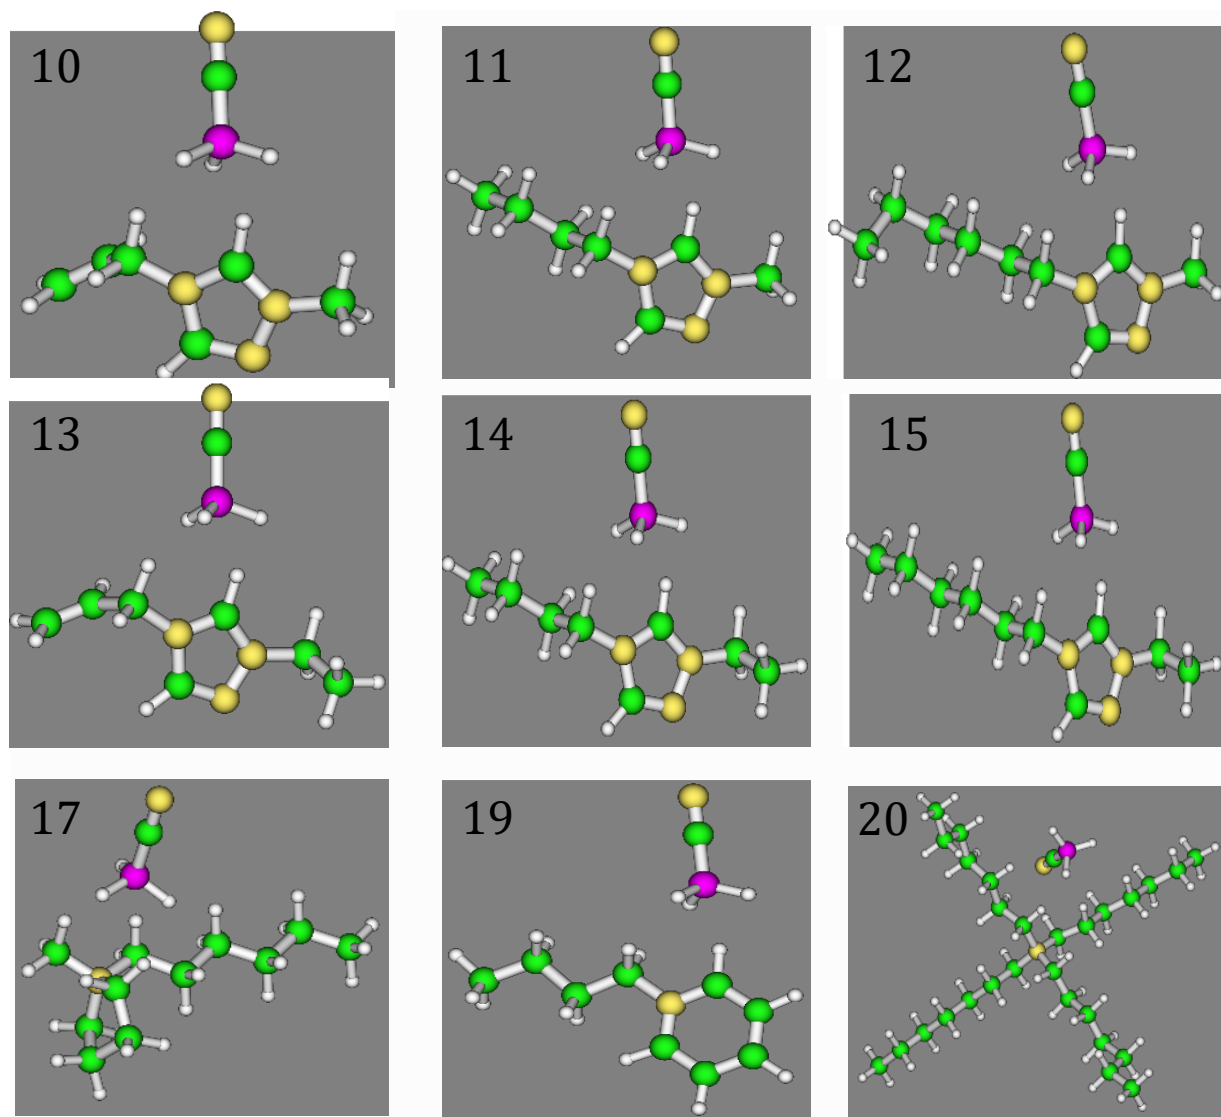

**Fig. S67.** The optimized structures of all ILs.

## Theoretical studies

Calculations of heats of formation for all ILs were based on the following set of hypothetical isodesmic (or nearly isodesmic) reactions from eqn. (1) to eqn. (9), respectively. In these isodesmic reactions, 1H-1,2,4-triazole ( $C_2H_3N_3$ ), ammonia ( $NH_3$ ), methane ( $CH_4$ ), propene ( $C_3H_6$ ), butane ( $C_4H_{10}$ ), n-hexane ( $C_6H_{14}$ ), ethane ( $C_2H_6$ ), heptane ( $C_7H_{14}$ ), pyridine ( $C_5H_5N$ ), pyrrolidine ( $C_4H_9N$ ), borane ( $BH_3$ ), and hydrogen cyanide ( $CHN$ ) are taken as reference molecules. Their experimental heats of formation are available and listed in Table S4.<sup>3</sup> The calculated heats of formation and combustion for these IL compounds are listed in Table 1.

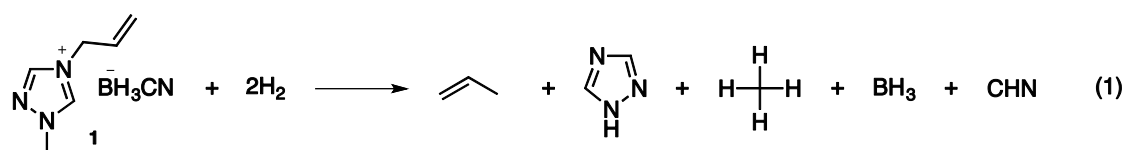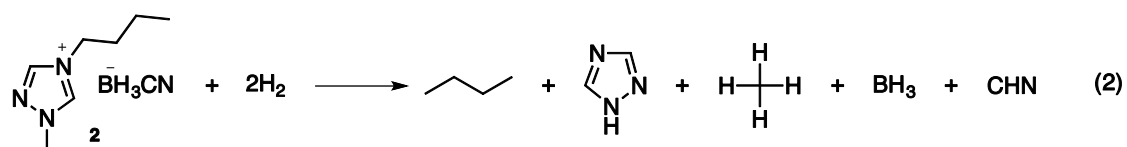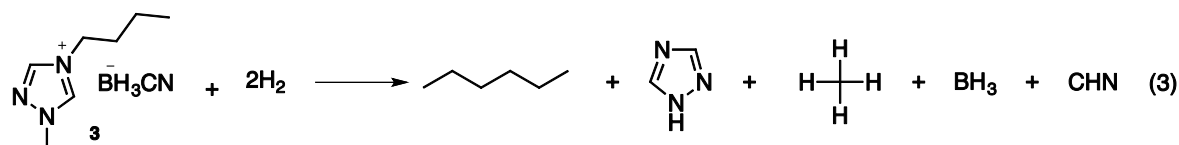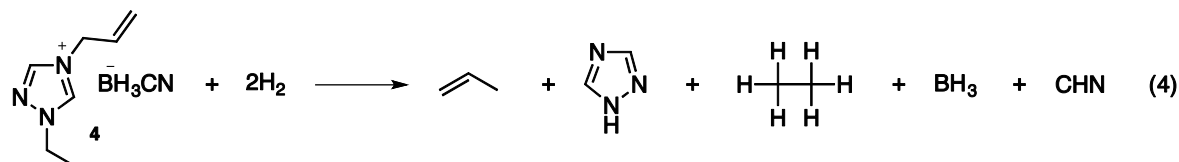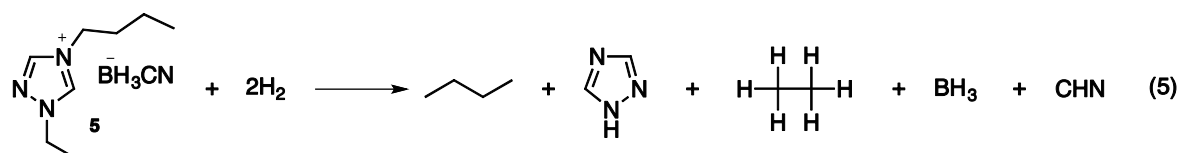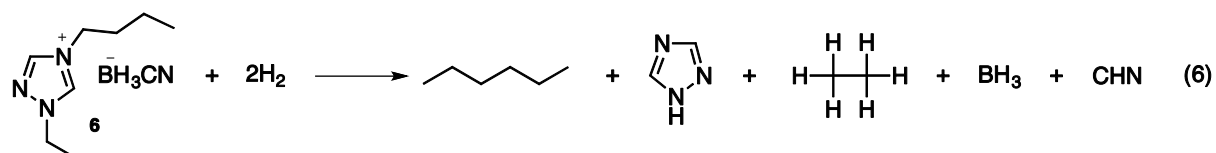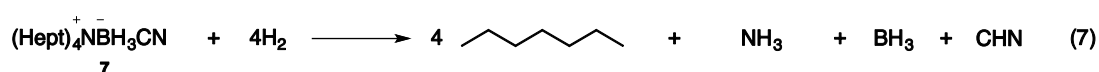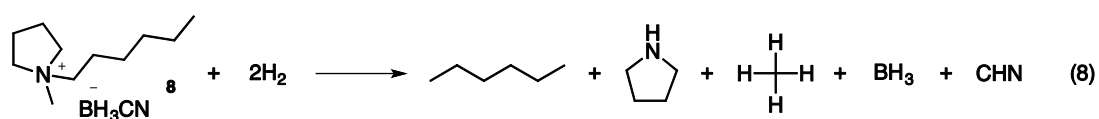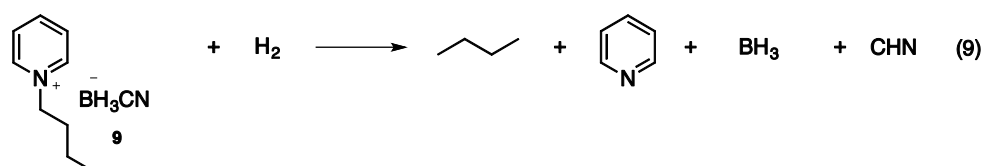

## Differential scanning calorimetry (DSC) curves

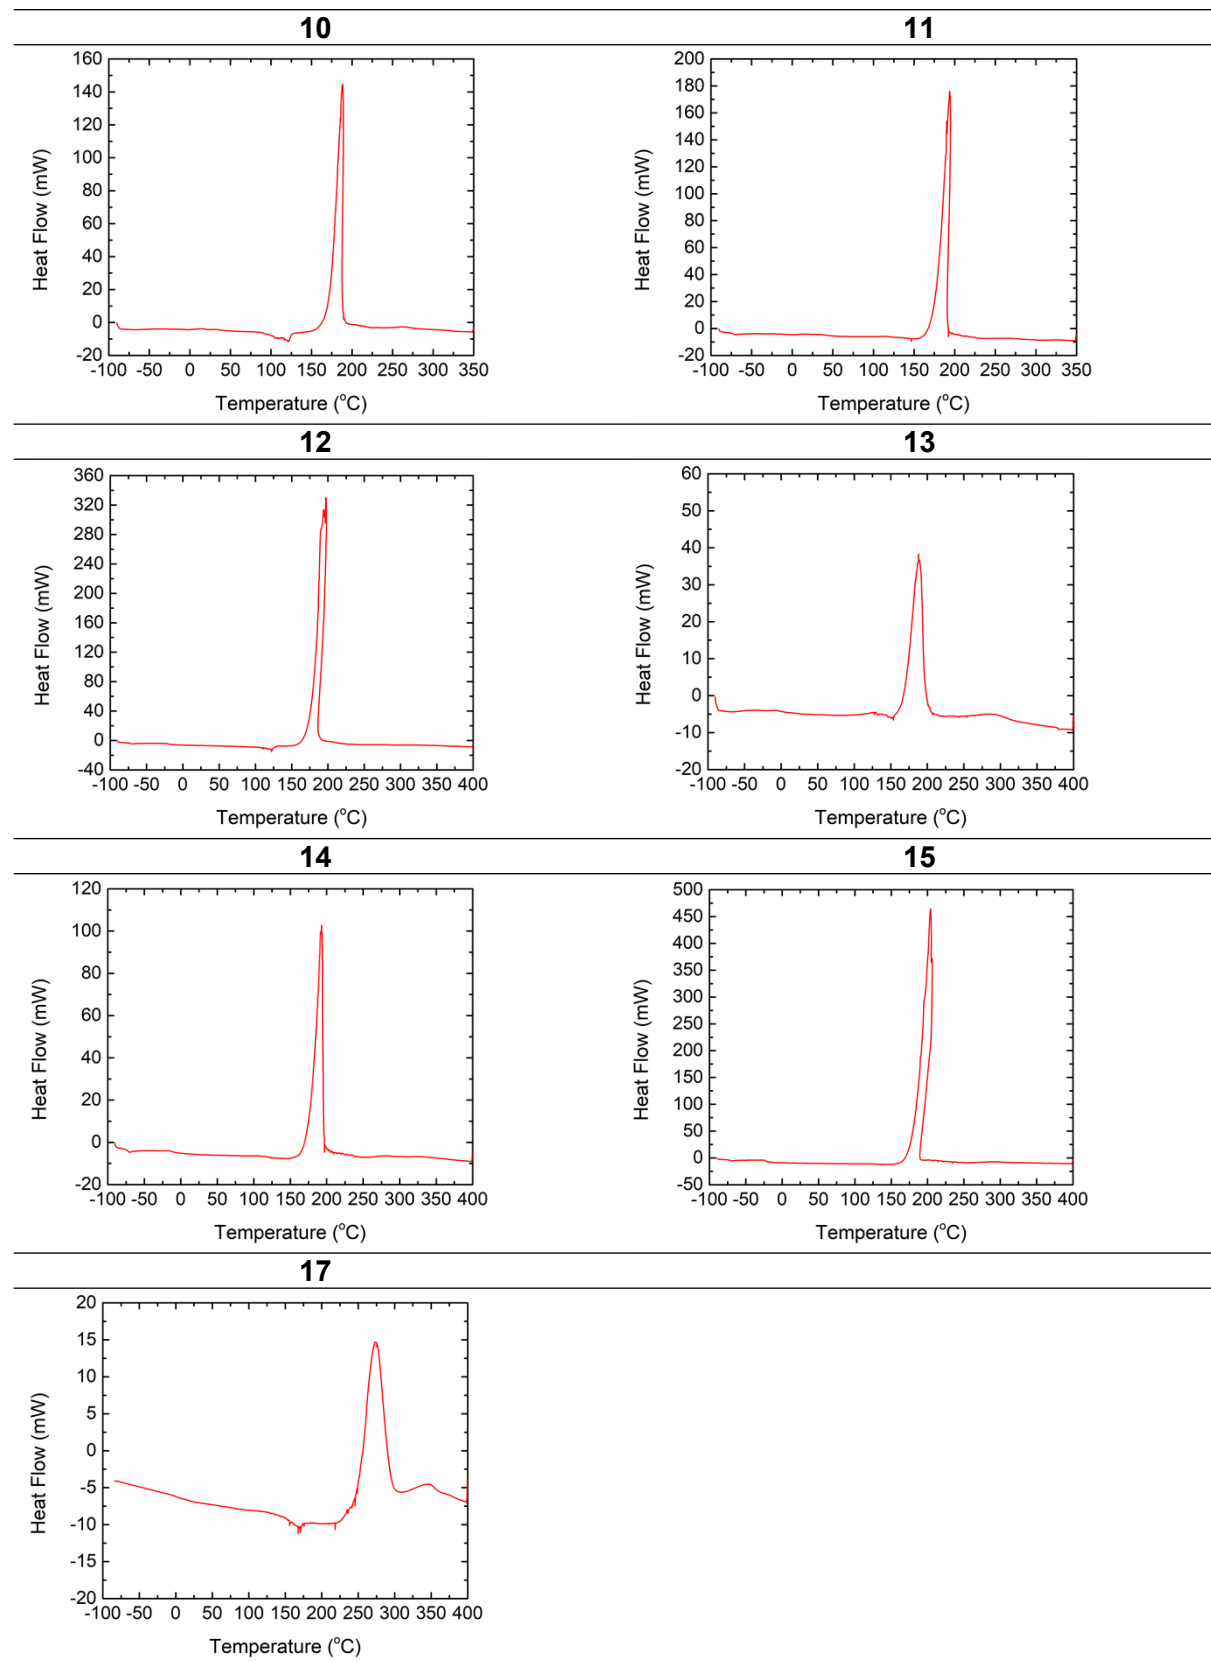

Fig. S68. DSC curves of selected ILs.

## $^{23}\text{Na}$ -NMR of 17

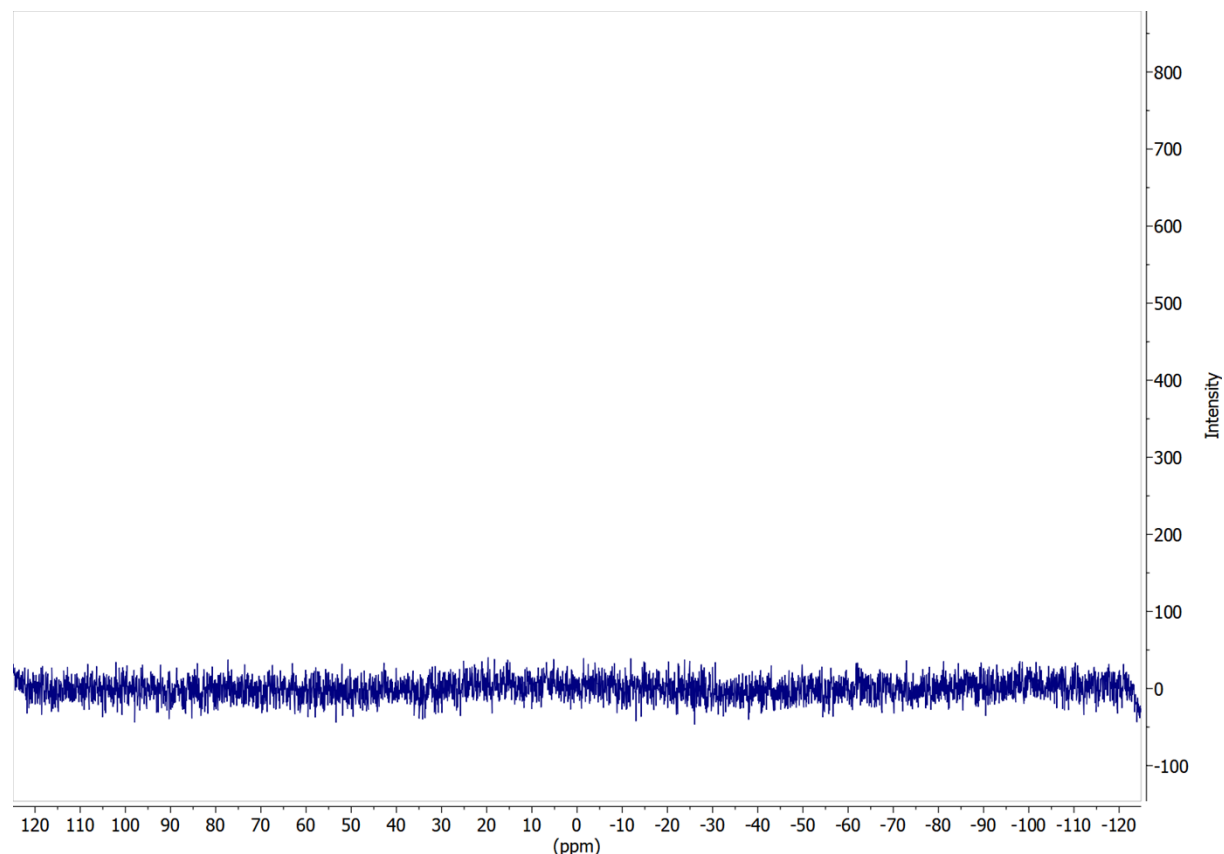

**Fig. S69.**  $^{23}\text{Na}$ -NMR (79 MHz,  $\text{CDCl}_3$ ) of 1-Hexyl-1-methylpyrrolidin-1-ium cyanotrihydroborate (17).

## References

- [1]. Gaussian 03, Revision C.02, M. J. Frisch, G. W. Trucks, H. B. Schlegel, G. E. Scuseria, M. A. Robb, J. R. Cheeseman, J. A. Montgomery, Jr., T. Vreven, K. N. Kudin, J. C. Burant, J. M. Millam, S. S. Iyengar, J. Tomasi, V. Barone, B. Mennucci, M. Cossi, G. Scalmani, N. Rega, G. A. Petersson, H. Nakatsuji, M. Hada, M. Ehara, K. Toyota, R. Fukuda, J. Hasegawa, M. Ishida, T. Nakajima, Y. Honda, O. Kitao, H. Nakai, M. Klene, X. Li, J. E. Knox, H. P. Hratchian, J. B. Cross, V. Bakken, C. Adamo, J. Jaramillo, R. Gomperts, R. E. Stratmann, O. Yazyev, A. J. Austin, R. Cammi, C. Pomelli, J. W. Ochterski, P. Y. Ayala, K. Morokuma, G. A. Voth, P. Salvador, J. J. Dannenberg, V. G. Zakrzewski, S. Dapprich, A. D. Daniels, M. C. Strain, O. Farkas, D. K. Malick, A. D. Rabuck, K. Raghavachari, J. B. Foresman, J. V. Ortiz, Q. Cui, A. G. Baboul, S. Clifford, J. Cioslowski, B. B. Stefanov, G. Liu, A. Liashenko, P. Piskorz, I. Komaromi, R. L. Martin, D. J. Fox, T. Keith, M. A. Al-Laham, C. Y. Peng, A. Nanayakkara, M. Challacombe, P. M. W. Gill, B. Johnson, W. Chen, M. W. Wong, C. Gonzalez, and J. A. Pople, Gaussian, Inc., Wallingford CT, 2004.
- [2]. Betsy M. Rice, Edward F. C. Byrd, William D. Mattson, Computational Aspects of Nitrogen-Rich HEDMs, *Struc. Bond.*, 2007, **125**, 153-194
- [3] M. W. Chase, Jr., NIST-JANAF Thermochemical Tables, Fourth Edition, *J. Phys. Chem. Ref. Data, Monograph*, **9** (1998) 1–1951.
